# Supplementary material for: A theoretical mechanistic study of IrIII/CuI-metallaphotoredox catalyzed asymmetric radical decarboxylative cyanation
Source: Royal Society of Chemistry journal article supplement (doi:10.1039/d0dt02630a), 2020-01-01
Supplement: d0dt02630a1.pdf [file d0dt02630a1.pdf]

## Electronic Supplementary Information

# Theoretical Mechanistic Study of Ir<sup>III</sup>/Cu<sup>I</sup>-Metallaphotoredox Catalyzed Asymmetric Radical Decarboxylative Cyanation

Yujie Liang,<sup>a,b</sup> Guangyan Sun,<sup>\*,a</sup> Zhongmin Su,<sup>\*,a,b</sup> Wei Guan<sup>\*,b</sup>

*<sup>a</sup>Department of Chemistry, Faculty of Science, Yanbian University, Yanji, Jilin 133002, P.  
R. China*

*<sup>b</sup>Faculty of Chemistry, Institute of Functional Material Chemistry, Northeast Normal  
University, Changchun 130024, P. R. China*

*E-mail: guanw580@nenu.edu.cn*

### Table of Contents

|                                                             |     |
|-------------------------------------------------------------|-----|
| COMPUTATIONAL DETAILS .....                                 |     |
| S2                                                          |     |
| 1. Correction of Translational Entropy in Solution.....     | S2  |
| 2. Redox Potential.....                                     | S2  |
| 3. Activation Barrier of Single Electron Transfer Step..... | S4  |
| 4. Fragment Molecular Orbital (FMO) Analysis.....           |     |
| S11                                                         |     |
| REFERENCES .....                                            | S15 |

## COMPUTATIONAL DETAILS

### 1. Correction of Translational Entropy in Solution

We evaluated the electronic energy ( $E_{sol}$ ) with zero-point energy correction in solution. For each species, the  $E_{sol}$  is defined through equation (S1):

$$E_{sol} = E_{sol}^{pot} + E_{gas}^{v_0} \quad (S1)$$

where the  $E_{sol}^{pot}$  is the potential energy including non-electrostatic energy in solution and  $E_{gas}^{v_0}$  delegates the zero-point vibrational energy in the gas phase. In a bimolecular process, such as the benzyl radical capture by Cu(II) complex, the entropy change which can decrease considerably must be taken into consideration. In such case, Gibbs energy ( $G_{sol}^o$ ) need be computed as follows:

$$\begin{aligned} G_{sol}^o &= H_0 - T(S_r^o + S_v^o + S_t^o) \\ &= E^T + P\Delta V - T(S_r^o + S_v^o + S_t^o) \\ &= E_{sol} + E_{therm} - T(S_r^o + S_v^o + S_t^o) \end{aligned} \quad (S2)$$

where  $\Delta V$  is 0 in solution,  $E_{therm}$  is the thermal correction by translational, vibrational, and rotational movements, and  $S_r^o$ ,  $S_v^o$ , and  $S_t^o$  are rotational, vibrational, and translational entropies, respectively.

In general, the Sackur-Tetrode equation is used to evaluate translational entropy  $S_t^o$ . In solution, however, the usual Sackur-Tetrode equation cannot be directly applied to the evaluation of  $S_t^o$ , because the translation movement is suppressed very much in solution.<sup>S1</sup> In this context, the translational entropy was corrected with the method developed by Whitesides et al., where the rotational entropy was evaluated in a normal manner. Thermal correction and entropy contributions of vibration movements to the Gibbs energy were evaluated with the frequencies calculated at 298.15 K and 1 atm.

### 2. Redox Potential

We calculated the standard redox potential ( $E_{1/2}^{red}$ ) according to the equation (S3):<sup>S2</sup>

$$E_{1/2}^{red} = -\frac{\Delta G_r}{nF} - E_{SHE} \quad (S3)$$

where  $F$  is the Faraday constant and  $n$  is the number of electrons transferred,  $E_{SHE} = 4.51$  V, and  $\Delta G_r$  is the free energy change of the reaction.

**Table S1.** The Gibbs free energy ( $G$ , a.u.), electronic energy ( $E_{opt}$ , a.u.), single point energy ( $E_{sp}$ , a.u.), and Gibbs free energy with the single point energy correction ( $G_{corr.}$ , a.u.) of \*Ir(III)<sub>DFT</sub> and \*Ir(III)<sub>TDDFT</sub>.

|               | *Ir(III) <sub>DFT</sub> (a.u.) | *Ir(III) <sub>TDDFT</sub> (a.u.) | $\Delta(*\text{Ir(III)}_{\text{TDDFT}} - *\text{Ir(III)}_{\text{DFT}})$<br>(kcal/mol) |
|---------------|--------------------------------|----------------------------------|---------------------------------------------------------------------------------------|
| $G^a$         | -1539.405209                   | -1539.409089                     | -2.4                                                                                  |
| $E_{opt}^a$   | -1539.81770017                 | -1539.823742                     | -3.8                                                                                  |
| $E_{sp}^b$    | -1539.89767944                 | -1539.895841                     | 1.1                                                                                   |
| $G_{corr.}^c$ | -1539.485188                   | -1539.481188                     | 2.5                                                                                   |

<sup>a</sup> at the (U)M06/[6-31G(d)/LanL2DZ (Ir)] level

<sup>b</sup> at the SMD(toluene)/(U)M06/[6-311++G(d,p)/SDD (Ir)] level

<sup>c</sup> at the SMD(toluene)/(U)M06/[6-311++G(d,p)/SDD (Ir)]/(U)M06/[6-31G(d)/LanL2DZ (Ir)] level

**Table S2.** The experimental and calculated redox potentials of Ir complexes.<sup>17</sup>

| Redox Potential      | $E_{1/2}^{red}$ [Ir <sup>IV</sup> /*Ir <sup>III</sup> ] | $E_{1/2}^{red}$ [Ir <sup>IV</sup> /Ir <sup>III</sup> ] |
|----------------------|---------------------------------------------------------|--------------------------------------------------------|
| Cal. <sup>DMF</sup>  | -1.81 V                                                 | 0.36 V                                                 |
| Cal. <sup>MeCN</sup> | -1.81 V                                                 | 0.36 V                                                 |
| Exp. <sup>MeCN</sup> | -1.73 V                                                 | 0.77 V                                                 |
| $\Delta$             | 0.08 V                                                  | 0.41 V                                                 |

**Table S3.** The experimental and calculated redox potentials of Cu complexes and NHP ester.<sup>17</sup>

| Redox Potential     | $E_{1/2}^{red}$ [NHP/NHP-] | $E_{1/2}^{red}$ [Cu <sup>II</sup> / Cu <sup>I</sup> ] |
|---------------------|----------------------------|-------------------------------------------------------|
| Cal. <sup>DMF</sup> | -1.46 V                    | -0.32 V                                               |

|                             |         |         |
|-----------------------------|---------|---------|
| <b>Cal.</b> <sup>MeCN</sup> | -1.42 V | -0.32 V |
| <b>Exp.</b> <sup>MeCN</sup> | -1.33 V | -       |
| $\Delta$                    | 0.09 V  | -       |

**Scheme S1.** Possible single electron transfer processes.  $\Delta G^{\circ\ddagger}$  values of SET processes are given in kcal/mol.

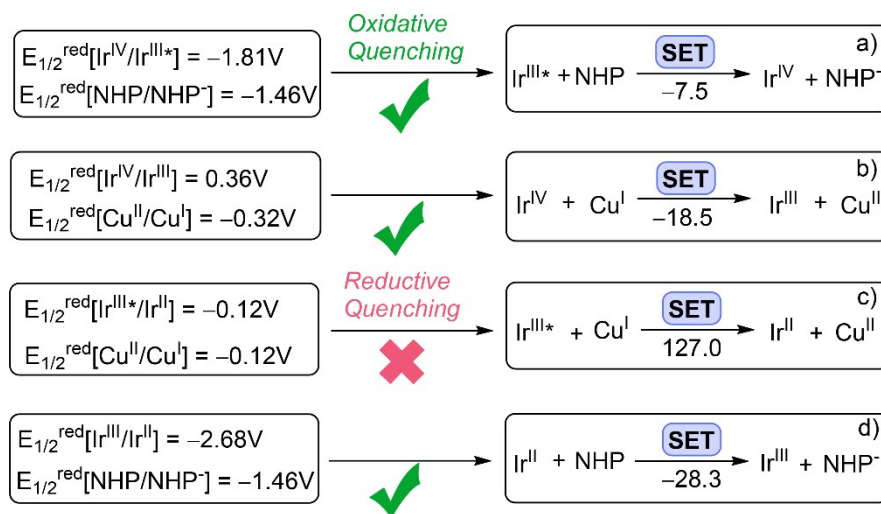

### 3. Activation Barrier of Single Electron Transfer Step

According to the Marcus equation, the reorganization energy  $\lambda$  is normally decomposed into internal energy ( $\lambda_i$ ) and external energy ( $\lambda_o$ ). The internal reorganization energy  $\lambda_i$  can be estimated according to the equation (S4):

$$\lambda_i = [E^{D^+}(Q_R) + E^{A^-}(Q_R)] - [E^{D^+}(Q_P) + E^{A^-}(Q_P)] \quad (\text{S4})$$

where  $Q_R$  and  $Q_P$  are the equilibrium geometries of the reactants and products, respectively. In addition, the external reorganization energy  $\lambda_o$  may be calculated from equation (S5–S7)

$$\lambda_o = (332 \text{ kcal/mol}) \left( \frac{1}{2a_1} + \frac{1}{2a_2} - \frac{1}{R} \right) \left( \frac{1}{\epsilon_{op}} - \frac{1}{\epsilon} \right) \quad (\text{S5})$$

$$\lambda = \lambda_o + \lambda_i \quad (\text{S6})$$

$$\Delta G^{\circ\ddagger} = \frac{(\Delta G_r + \lambda)^2}{4\lambda} \quad (\text{S7})$$

where  $a_1$  is the radii of the oxidant,  $a_2$  is the radii of the reductant,  $R = a_1 + a_2$ ,  $\epsilon_{op}$  is the optical dielectric constant ( $\epsilon_{op} = 2.25$ ),  $\epsilon$  is the static dielectric constant for the toluene solvent ( $\epsilon = 2.37$ ), and  $\Delta G_r$  is the free energy change of the reaction.

**Table S4.** Calculated electron transfer energy barriers related parameters for SET a) and b) in Scheme S1.

| SET step | $a_1$<br>(Å) | $a_2$<br>(Å) | $R$<br>(Å) | $\lambda$<br>(kcal/mol) | $\Delta G_r$<br>(kcal/mol) | $\Delta G_{SET}$<br>(kcal/mol) |
|----------|--------------|--------------|------------|-------------------------|----------------------------|--------------------------------|
| (a)      | 3.73         | 4.14         | 7.88       | 28.3                    | -7.5                       | 3.6                            |
| (b)      | 4.16         | 3.87         | 8.02       | 38.6                    | -18.5                      | 2.6                            |

**Table S5.** The zero-point energy ( $ZPE$ , a.u.) correction, Gibbs free energy ( $G$ , a.u.), electronic energy ( $E_{opt}$ , a.u.), single point energy ( $E_{sp}$ , a.u.), and Gibbs free energy with the single point energy correction ( $G_{corr.}$ , a.u.) of **3** and **TS2**.

|                               | <b>3</b> (a.u.) | <b>TS2</b> (a.u.) | $\Delta(\mathbf{TS2-3})$ (kcal/mol) |
|-------------------------------|-----------------|-------------------|-------------------------------------|
| $ZPE$ correction <sup>a</sup> | 0.375475        | 0.372299          | -2.0                                |
| $G^a$                         | -1167.482567    | -1167.477707      | 3.0                                 |
| $E_{opt}^a$                   | -1167.800169    | -1167.790423      | 6.1                                 |
| $E_{sp}^b$                    | -1168.21595     | -1168.218893      | -1.8                                |
| $G_{corr.}^c$                 | -1167.898348    | -1167.906177      | -4.9                                |

<sup>a</sup> at the (U)M06/[6-31G(d)/LanL2DZ (Ir,Cu)] level

<sup>b</sup> at the SMD(toluene)/(U)M06/[6-311++G(d,p)/SDD (Ir,Cu)] level

<sup>c</sup> at the SMD(toluene)/(U)M06/[6-311++G(d,p)/SDD (Ir,Cu)]/(U)M06/[6-31G(d)/LanL2DZ (Ir,Cu)] level

**Scheme S2.** Charges and spin states of some structures in Fig. 1 and Fig. 2.

(charge, spin state)

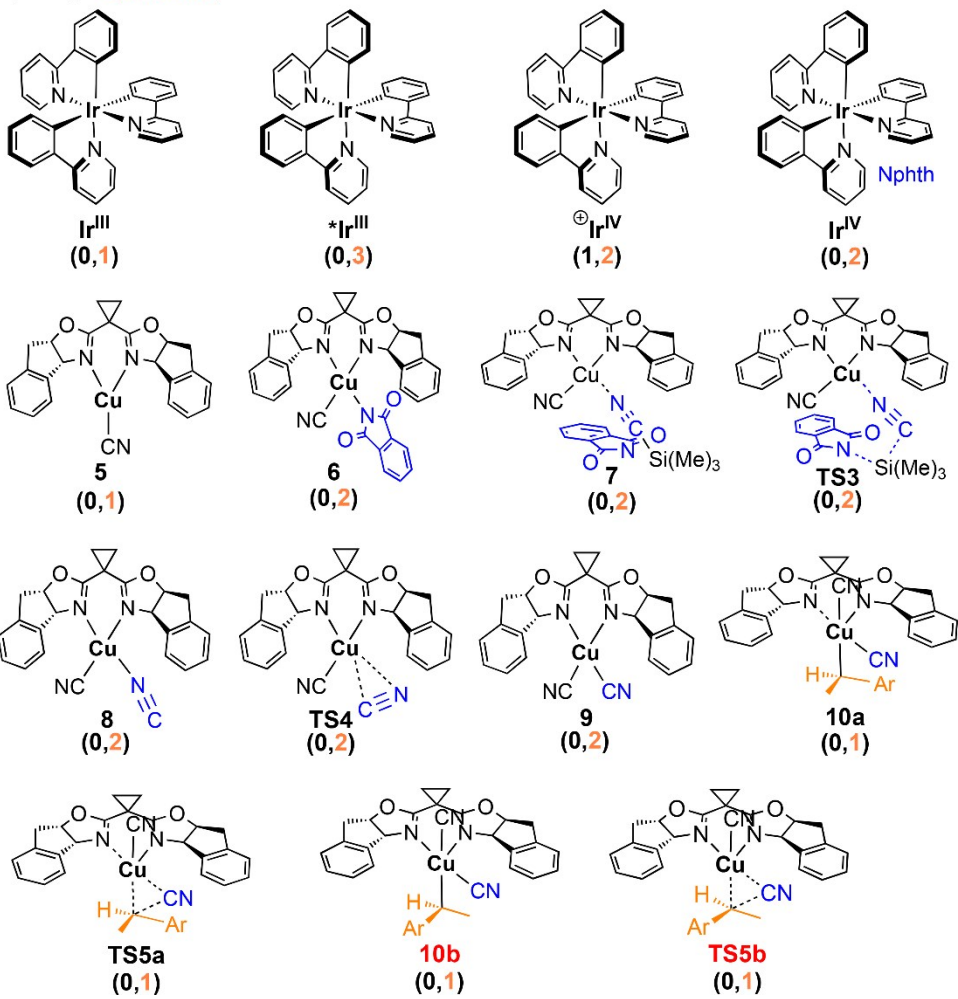

**Scheme S3.** Evaluation of active species.

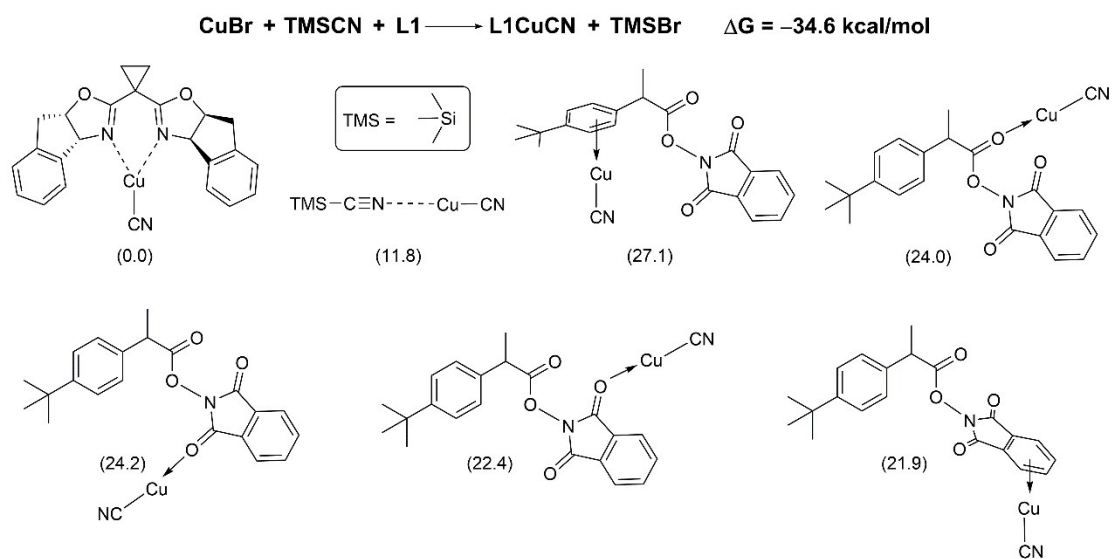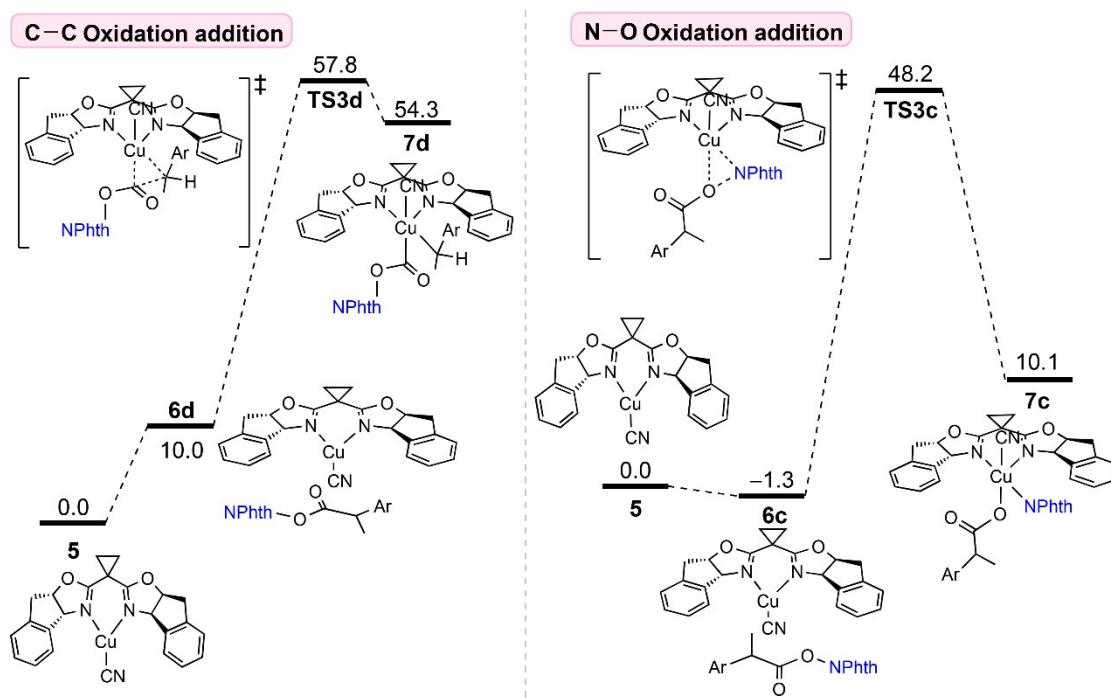

**Fig. S1** Gibbs energy profiles ( $\Delta G^\circ_{298.15}$ ) of oxidative additions the C–C and N–O bonds of NHP ester **1** to Cu(I) center of **5**.

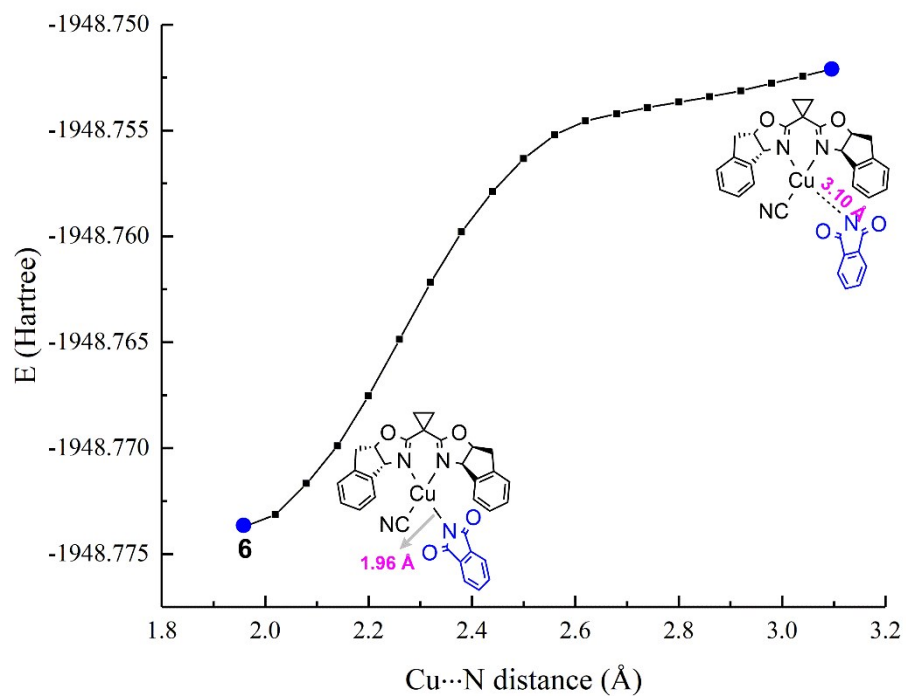

**Fig. S2** Relaxed scanning the potential energy surface of Nphth<sup>-</sup> anion dissociation by modulating Cu...N distance of **6** calculated at the (U)M06/[6-31G(d)/LanL2DZ (Ir, Cu)] level.



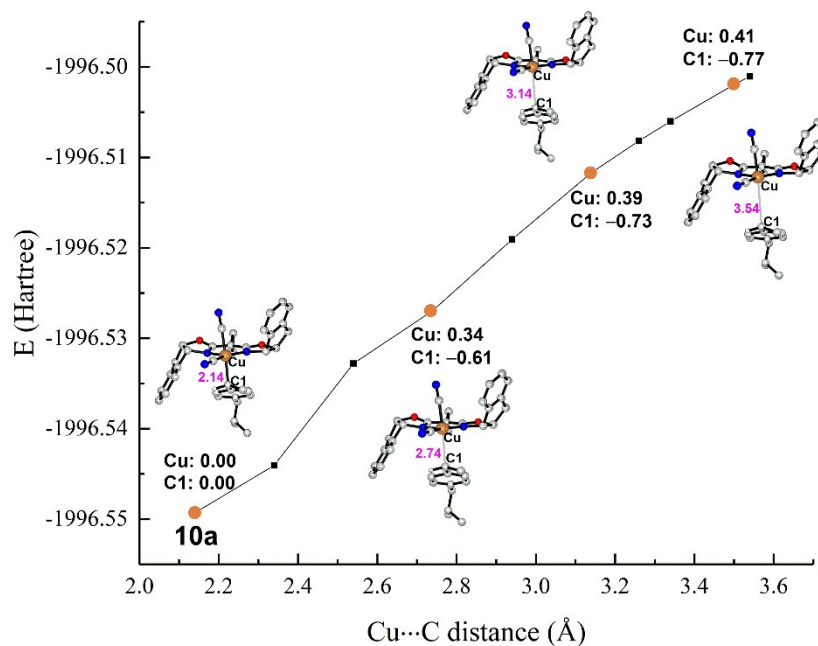

**Fig. S3** Relaxed scanning the potential energy surface of benzyl radical dissociation by modulating Cu...C distance of **10a** calculated at the (U)M06/[6-31G(d)/LanL2DZ (Ir, Cu)] level. As the distance of Cu...C increases, the spin polarization becomes more and more obvious.

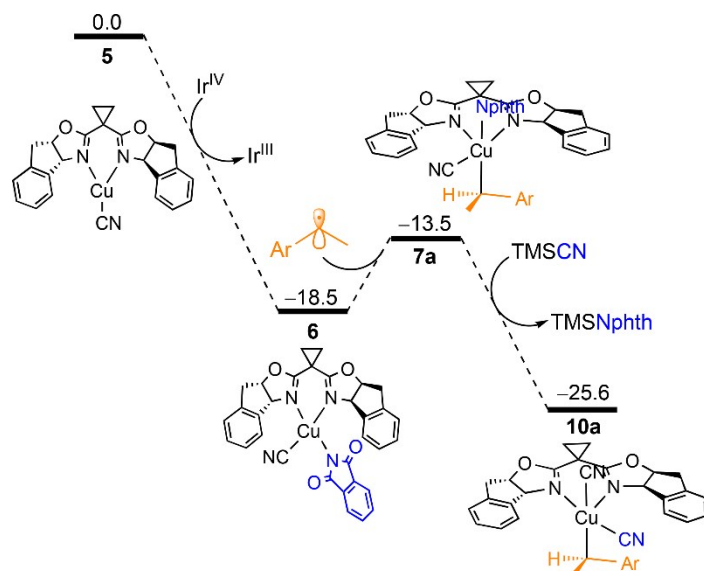

**Fig. S4** Gibbs energy profile ( $\Delta G^\circ_{298,15}$ ) of the radical capture from **6**.

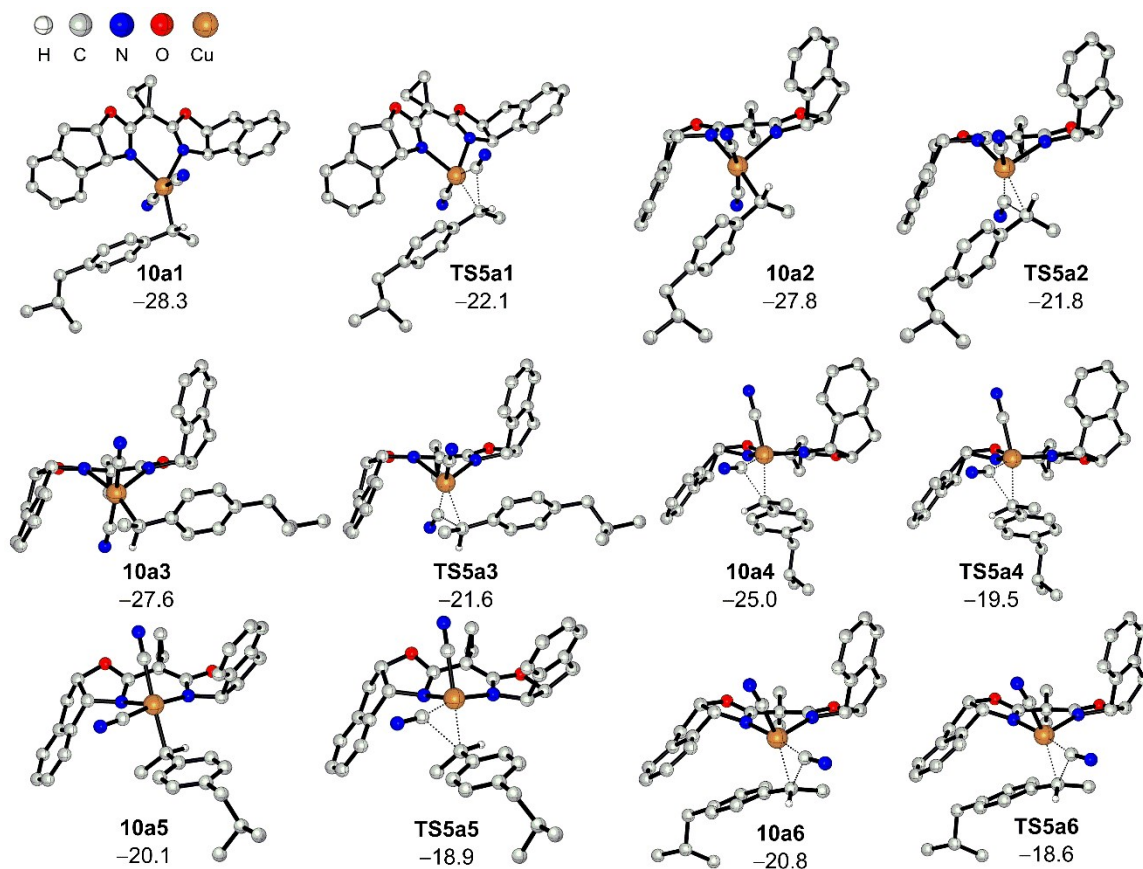

Fig. S5 Optimized structures for selected important stationary points leading to *R-pro* in Fig. 3.

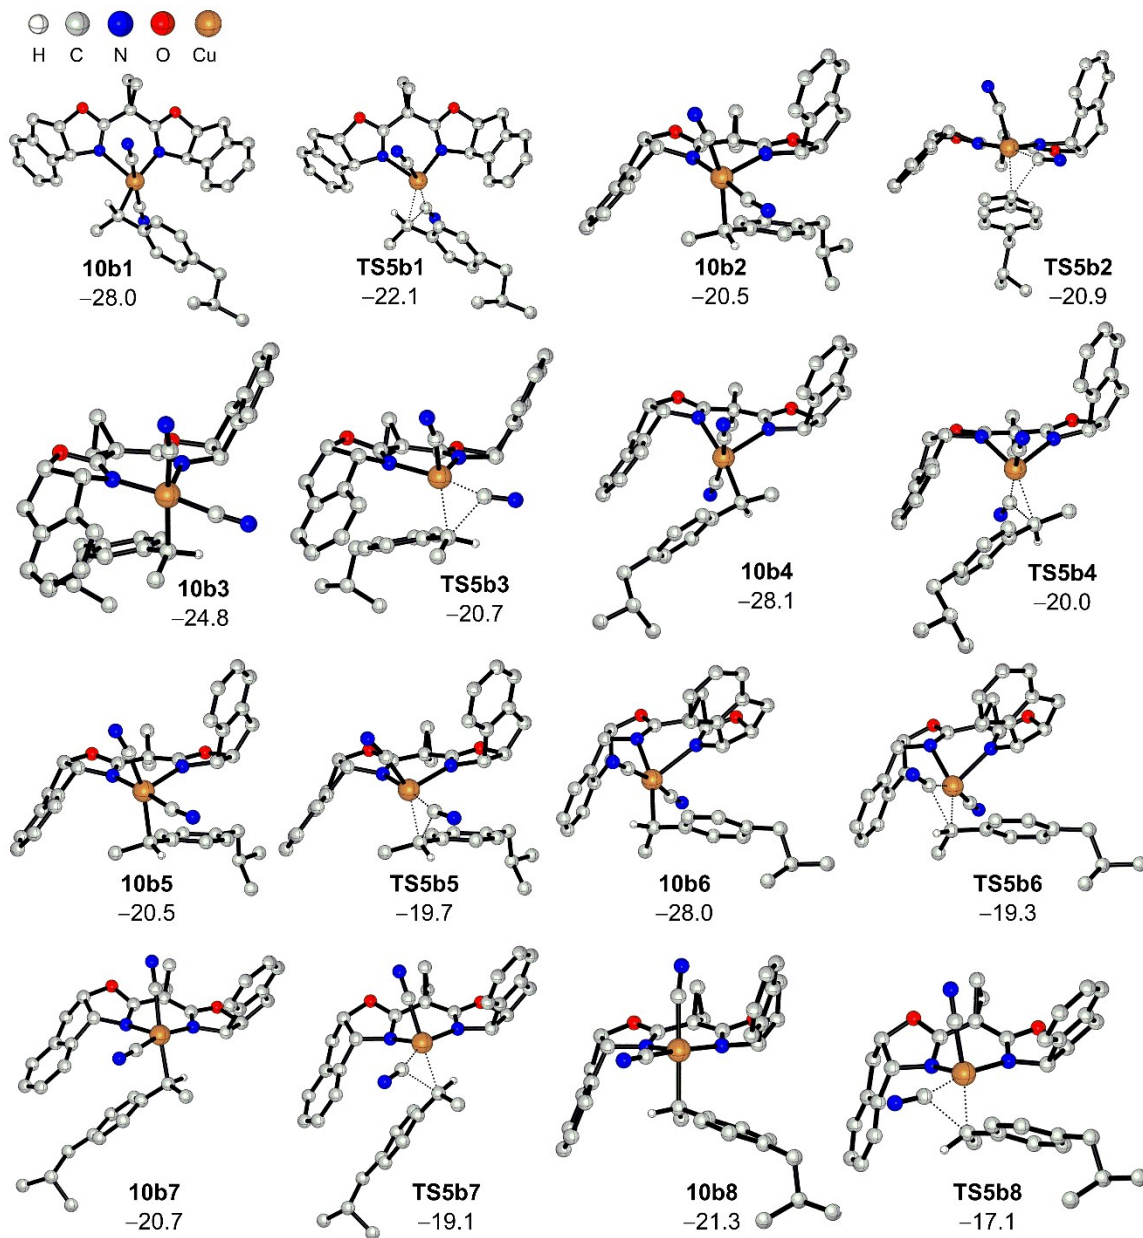

Fig. S6 Optimized structures for selected important stationary points leading to *S-pro* in Fig. 3.

#### 4. Fragment Molecular Orbital (FMO) Analysis

Generally, MOs of a total system AB can be represented by a linear combination of MOs of fragments A and B;<sup>S3</sup> see eqn (S8):

$$\varphi_i^{AB} = \sum_m C_{im}^A \varphi_m^A + \sum_{n} C_{in}^B \varphi_n^B \quad (\text{S8})$$

where  $\varphi_i^{AB}$  represents the *i*th MO of complex AB and  $\varphi_m^A$  and  $\varphi_n^B$  are the *m*th and *n*th MOs of fragments A and B, respectively.  $C_{im}^A$  and  $C_{in}^B$  are expansion coefficients of  $\varphi_m^A$  and  $\varphi_n^B$ , respectively. Electron populations of  $\varphi_m^A$  and  $\varphi_n^B$  can be obtained from these coefficients.

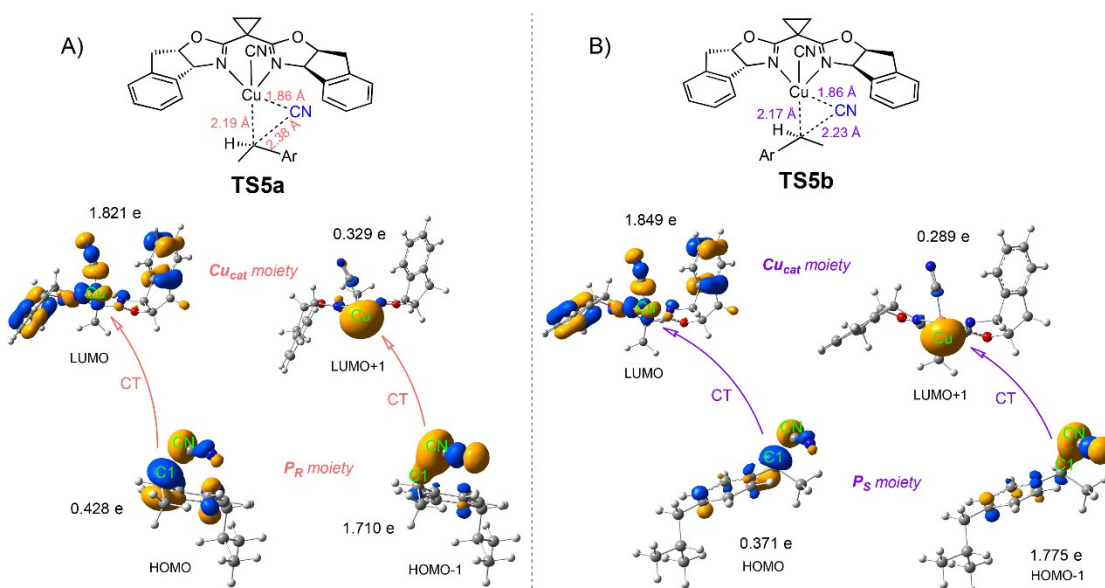

**Fig. S7** Important Kohn–Sham orbitals and their electron populations of Cu<sub>cat</sub> and P moieties in **TS5a** (or **TS5b**).

As shown in Fig. S7A, **TS5a** is divided into two fragments as copper catalyst (Cu<sub>cat</sub>) and product (P<sub>R</sub>) moieties. Specifically, the electron population of the lowest unoccupied molecular orbital (LUMO) of the Cu<sub>cat</sub> moiety highly increases to 1.821e in **TS5a**. Consistent with this increase in population, the population of the highest occupied molecular orbital (HOMO) of the P<sub>R</sub> moiety decreases to 0.428e. The substantial CT occurs from the  $\sigma^*$  anti-bonding orbital (HOMO of P<sub>R</sub> moiety) consisting of the p orbitals of the C1 and C( $\equiv$ N) atoms (pC1 and pC( $\equiv$ N)) to the Cu 3d $_{\pi}$  orbital (LUMO), indicating that the C1–C( $\equiv$ N) bond formation is under progress. In addition, the electron population of LUMO+1 of the Cu<sub>cat</sub> moiety moderately increases to 0.329e in **TS5a**, where the empty orbital mainly consists of 4p

and 3d orbitals of the Cu center. Correspondingly, the population of the HOMO-1 of the P<sub>R</sub> moiety decreases to 1.710e. These results clearly indicate that the CT occurs from the pC1 and pC(≡N) orbitals to the LUMO and LUMO+1 of the Cu<sub>cat</sub> moiety. These CTs contribute to the change of the Cu<sup>III</sup> to the Cu<sup>I</sup> and the formation of a new C1–C(≡N) bond. As shown in Fig. S7B, **TS5b** is divided into Cu<sub>cat</sub> and P<sub>S</sub> moieties in the same way. The LUMO and LUMO+1 populations of the Cu<sub>cat</sub> moiety increase to 1.849e and 0.289e, respectively, and the populations of the HOMO and HOMO-1 of the P<sub>S</sub> moiety correspondingly decreases to 0.371e and 1.775e. This means that a CT similar to that in **TS5a** from σ\* to 3d<sub>π</sub> and from lone pair to 4p and 3d orbitals of the Cu center is formed in **TS5b**.

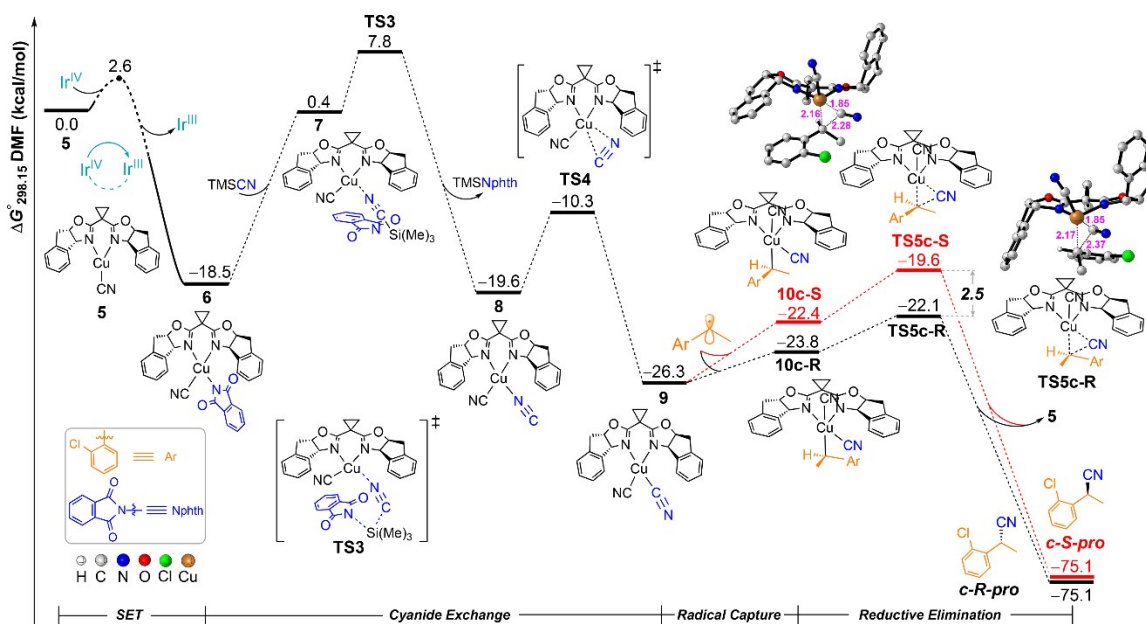

**Fig. S8** Gibbs energy profiles ( $\Delta G^{\circ}_{298.15}$ ) of copper catalytic cycle (Cu<sup>I</sup>–Cu<sup>II</sup>–Cu<sup>III</sup>–Cu<sup>I</sup>) providing R-type (black line) and S-type (red line) products with the substrate **S1** (Table 2, entry 1).



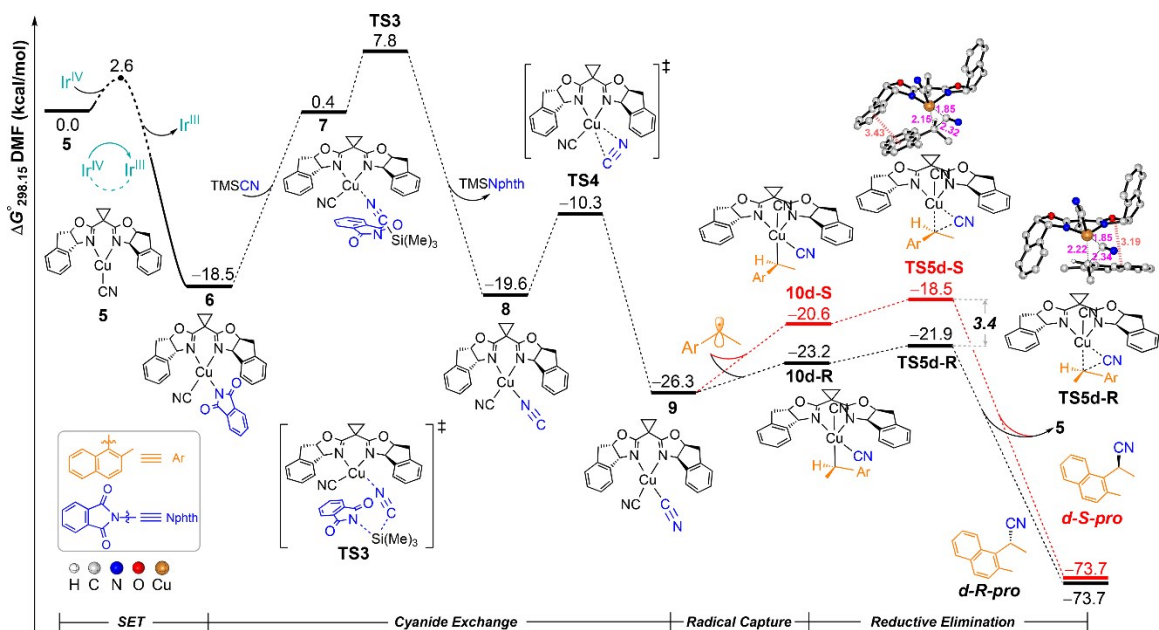

**Fig. S9** Gibbs energy profiles ( $\Delta G^{\circ}_{298.15}$ ) of copper catalytic cycle ( $\text{Cu}^{\text{I}}-\text{Cu}^{\text{II}}-\text{Cu}^{\text{III}}-\text{Cu}^{\text{I}}$ ) providing R-type (black line) and S-type (red line) products with the substrate **S2** (Table 2, entry 2).

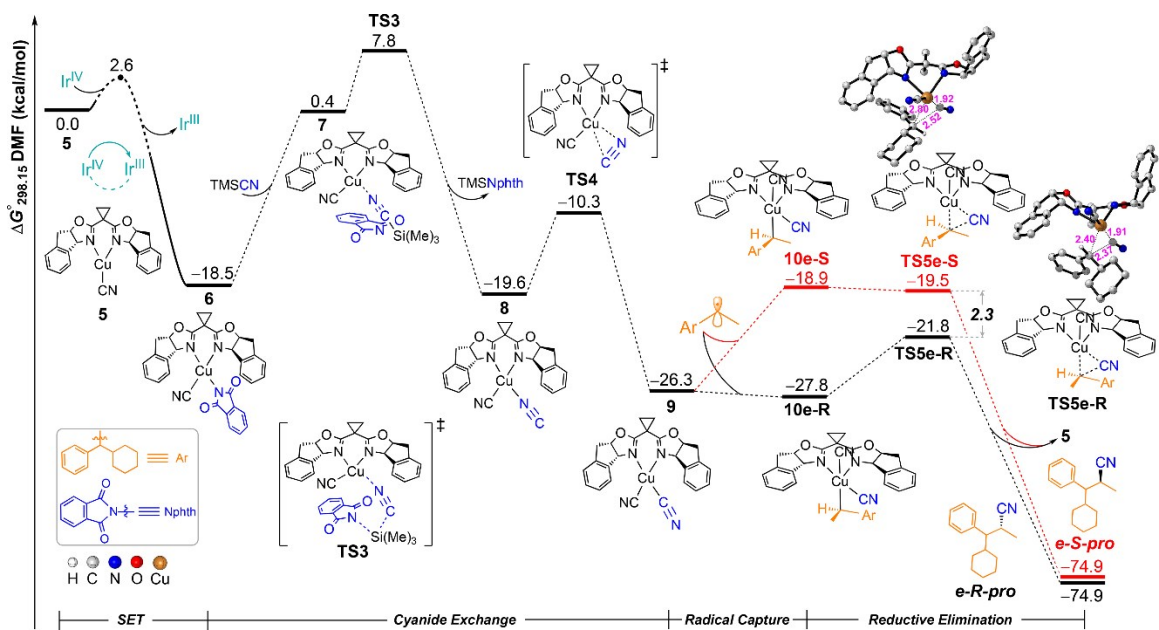

**Fig. S10** Gibbs energy profiles ( $\Delta G^{\circ}_{298.15}$ ) of copper catalytic cycle ( $\text{Cu}^{\text{I}}-\text{Cu}^{\text{II}}-\text{Cu}^{\text{III}}-\text{Cu}^{\text{I}}$ ) providing R-type (black line) and S-type (red line) products with the substrate **S3** (Table 2, entry 3).

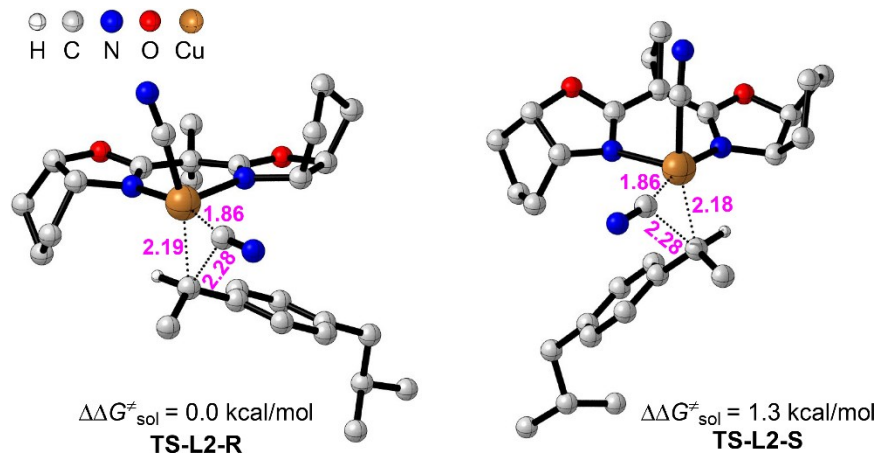

**Fig. S11** Relative Gibbs energies ( $\Delta G^{\circ}_{298.15}$ ) of transition states **TS-L2-R** and **TS-L2-S** calculated with the chiral ligand **L2** (Table 2, entry 4).

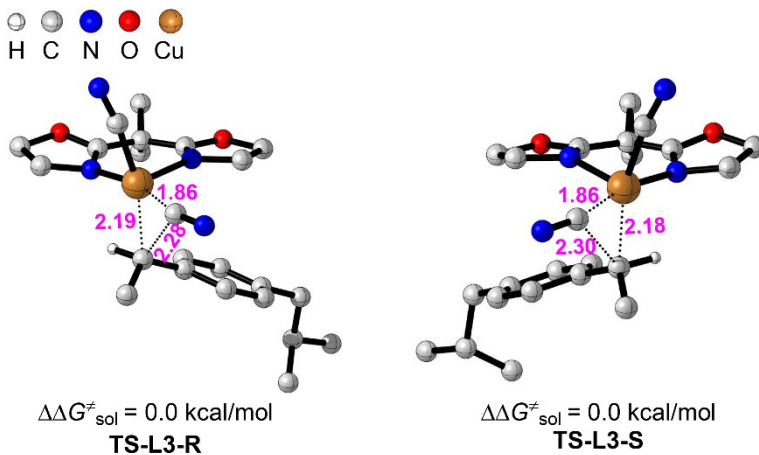

**Fig. S12** Relative Gibbs energies ( $\Delta G^{\circ}_{298.15}$ ) of transition states **TS-L3-R** and **TS-L3-S** calculated with the chiral ligand **L3** (Table 2, entry 5).

## REFERENCES

- S1. (a) S. Sakaki, Y. Y. Ohnishi and H. Sato, Theoretical and computational studies of organometallic reactions: successful or not? *Chem. Rec.*, 2010, **10**, 29–45; (b) A. Ishikawa, Y. Nakao, H. Sato and S. Sakaki, Oxygen atom transfer reactions of iridium and osmium complexes: theoretical study of characteristic features and significantly large differences between these two complexes, *Inorg. Chem.*, 2009, **48**, 8154–8163; (c) A. Ishikawa, Y. Nakao, H. Sato and S. Sakaki, Pd(II)-promoted direct cross-coupling reaction of arenes via highly regioselective aromatic C–H activation: a theoretical study, *Dalton Trans.*, 2010, **39**, 3279–3289.
- S2. A. V. Marenich, J. Ho, M. L. Coote, C. J. Cramer and D. G. Truhlar, Computational electrochemistry: prediction of liquid-phase reduction potentials, *Phys. Chem. Chem. Phys.*, 2014, **16**, 15068–15106.
- S3. (a) H. Baba, S. Suzuki and T. Takemura, Configuration analysis in the LCAO molecular orbital theory, *J. Chem. Phys.*, 1969, **50**, 2078–2086. (b) S. Kato, S. Yamabe and K. Fukui, Molecular orbital calculations of the electronic structure of borazane, *J. Chem. Phys.*, 1974, **60**, 572–578. (c) S. Dapprich and G. Frenking, Rotational analysis of n=4–7 rydberg states of CO observed by ion-dip spectroscopy, *J. Phys. Chem.*, 1995, **99**, 9352–9362.



## CARTESIAN COORDINATES OF OPTIMIZED STRUCTURES

**1**

|   |             |             |             |
|---|-------------|-------------|-------------|
| C | 4.48456400  | -0.39277100 | -0.27454100 |
| C | 3.49132800  | -0.32336500 | -1.25503800 |
| C | 2.21200600  | -0.80740700 | -1.02211900 |
| C | 1.88483900  | -1.37390500 | 0.21257500  |
| C | 2.87076800  | -1.44350200 | 1.19435000  |
| C | 4.15264300  | -0.96120900 | 0.95388100  |
| H | 3.73208800  | 0.11667800  | -2.22439700 |
| H | 1.45327000  | -0.73035100 | -1.79887400 |
| H | 2.63224700  | -1.88357500 | 2.16356000  |
| H | 4.91099300  | -1.02269400 | 1.73594000  |
| C | 5.85276900  | 0.16737400  | -0.53879300 |
| C | 0.52134800  | -1.95805900 | 0.48392700  |
| H | 0.46592700  | -2.27260200 | 1.53547200  |
| C | -0.60613300 | -0.99184100 | 0.24549000  |
| C | 5.91532400  | 1.70034100  | -0.48881800 |
| H | 5.18863600  | 2.08869400  | -1.22419200 |
| O | -1.60779100 | -1.25342400 | 1.17806300  |
| N | -2.76508600 | -0.59013400 | 0.88722100  |
| O | -0.73913200 | -0.18431800 | -0.62646900 |
| C | -2.91995000 | 0.78198800  | 1.19079600  |
| C | -3.56064100 | -1.01792500 | -0.19703000 |
| O | -3.44269300 | -2.06512200 | -0.77878100 |
| O | -2.21537700 | 1.42724300  | 1.91935300  |
| C | -4.50470600 | 0.10681200  | -0.40243600 |
| C | -4.12562400 | 1.16977100  | 0.41580700  |
| C | -4.82238200 | 2.36290200  | 0.41896800  |
| C | -5.92379300 | 2.46423300  | -0.43258700 |
| C | -6.30286000 | 1.40009600  | -1.25231100 |
| C | -5.59348400 | 0.19797600  | -1.24844000 |

|   |             |             |             |
|---|-------------|-------------|-------------|
| H | -4.51116300 | 3.18571200  | 1.05933400  |
| H | -6.49603600 | 3.38936600  | -0.46264100 |
| H | -7.16429900 | 1.51334400  | -1.90751100 |
| H | -5.87363400 | -0.63844600 | -1.88555200 |
| C | 0.21764500  | -3.17973900 | -0.40098300 |
| H | -0.78286800 | -3.57788300 | -0.19111400 |
| H | 0.25932600  | -2.90313100 | -1.46165800 |
| H | 0.96308900  | -3.96184800 | -0.21890400 |
| H | 6.57090200  | -0.23363300 | 0.19643600  |
| H | 6.20361200  | -0.16557400 | -1.52906200 |
| C | 5.53339000  | 2.22772200  | 0.88644600  |
| H | 5.59751100  | 3.32321100  | 0.92266000  |
| H | 4.51284600  | 1.93920000  | 1.16782600  |
| H | 6.21761000  | 1.82974900  | 1.65262300  |
| C | 7.30605200  | 2.17736200  | -0.88082700 |
| H | 8.05606900  | 1.80173700  | -0.16811000 |
| H | 7.59144600  | 1.82333800  | -1.88072300 |
| H | 7.36935900  | 3.27350000  | -0.87889200 |

**2**

|   |            |             |             |
|---|------------|-------------|-------------|
| C | 4.59156700 | -0.44666100 | -0.28535100 |
| C | 3.57322900 | -0.27835400 | -1.22708900 |
| C | 2.26448600 | -0.65040800 | -0.95299900 |
| C | 1.92841300 | -1.20071200 | 0.28808600  |
| C | 2.94297900 | -1.36943800 | 1.22909700  |
| C | 4.25435000 | -0.99996600 | 0.94824100  |
| H | 3.81668400 | 0.15330400  | -2.20047800 |
| H | 1.47990100 | -0.49343300 | -1.69013200 |
| H | 2.69847700 | -1.79793400 | 2.20238800  |
| H | 5.03203500 | -1.13672500 | 1.70264200  |
| C | 5.99329800 | -0.00062200 | -0.59210800 |
| C | 0.53363900 | -1.67350800 | 0.60270100  |
| H | 0.46366500 | -1.89418000 | 1.67707400  |

|   |             |             |             |
|---|-------------|-------------|-------------|
| C | -0.56458700 | -0.68663000 | 0.26961500  |
| C | 6.18963800  | 1.52005700  | -0.53082100 |
| H | 5.47305000  | 1.97674800  | -1.23585600 |
| O | -1.53039500 | -0.80507900 | 1.22418200  |
| N | -2.74629200 | -0.29507100 | 0.83722200  |
| O | -0.63830900 | 0.00251200  | -0.70966600 |
| C | -3.12168100 | 1.05803600  | 1.05959200  |
| C | -3.53303100 | -1.01950500 | -0.10029700 |
| O | -3.24573800 | -2.15262200 | -0.50323000 |
| O | -2.48678200 | 1.86092300  | 1.74142100  |
| C | -4.60188400 | -0.09967500 | -0.36780700 |
| C | -4.35961900 | 1.13567400  | 0.32382500  |
| C | -5.26411600 | 2.19535600  | 0.20276000  |
| C | -6.38803300 | 2.03838400  | -0.58552900 |
| C | -6.62781300 | 0.81468900  | -1.27236000 |
| C | -5.74511500 | -0.24101800 | -1.16589000 |
| H | -5.06571000 | 3.12953100  | 0.73034200  |
| H | -7.10058500 | 2.85773200  | -0.68855500 |
| H | -7.52052000 | 0.71651100  | -1.89161500 |
| H | -5.91839000 | -1.18109600 | -1.69169600 |
| C | 0.17109200  | -2.94984800 | -0.17629900 |
| H | -0.87339500 | -3.22788700 | 0.01408300  |
| H | 0.27365800  | -2.77054700 | -1.25428100 |
| H | 0.84151600  | -3.77174900 | 0.10584400  |
| H | 6.70043400  | -0.46923600 | 0.11467600  |
| H | 6.28362500  | -0.34881000 | -1.59743600 |
| C | 5.90025700  | 2.06170700  | 0.86105900  |
| H | 6.05372100  | 3.14844600  | 0.90507800  |
| H | 4.87011000  | 1.85096200  | 1.17297300  |
| H | 6.57515700  | 1.59917600  | 1.59935200  |
| C | 7.60128300  | 1.88429300  | -0.96737900 |
| H | 8.34104000  | 1.43774600  | -0.28466700 |
| H | 7.82118300  | 1.51841700  | -1.97994700 |

|   |            |            |             |
|---|------------|------------|-------------|
| H | 7.75806900 | 2.97152600 | -0.95828100 |
|---|------------|------------|-------------|

**TS1**

|   |             |             |             |
|---|-------------|-------------|-------------|
| C | 4.25907800  | 0.34825200  | 0.60128400  |
| C | 3.18146600  | 1.02924600  | 0.02848100  |
| C | 1.96040500  | 0.40518400  | -0.18589000 |
| C | 1.77193400  | -0.93306300 | 0.17796900  |
| C | 2.84613700  | -1.61216100 | 0.75292000  |
| C | 4.07043200  | -0.98464300 | 0.96072100  |
| H | 3.30433700  | 2.07934700  | -0.24724000 |
| H | 1.11980100  | 0.95491900  | -0.60347500 |
| H | 2.71678500  | -2.65537300 | 1.04645300  |
| H | 4.89654800  | -1.53792900 | 1.41319800  |
| C | 5.58323400  | 1.03423600  | 0.78666300  |
| C | 0.48364500  | -1.66329300 | -0.09101900 |
| H | 0.50557200  | -2.62520800 | 0.44089200  |
| C | -0.78422700 | -0.92603200 | 0.34198600  |
| C | 6.38613900  | 1.20060100  | -0.51006000 |
| H | 5.75526500  | 1.76147000  | -1.22198800 |
| O | -1.66542100 | -1.79468100 | 0.80929100  |
| N | -3.18733500 | -1.31012900 | 0.54331700  |
| O | -0.97155800 | 0.26067000  | 0.15965200  |
| C | -3.54672500 | -0.25850400 | 1.43747900  |
| C | -3.43996600 | -0.93374300 | -0.80225700 |
| O | -3.05219000 | -1.56463100 | -1.79381400 |
| O | -3.23591800 | -0.18123400 | 2.60586400  |
| C | -4.27141400 | 0.24660300  | -0.71146300 |
| C | -4.38422400 | 0.65396800  | 0.63461200  |
| C | -5.14648400 | 1.73482400  | 1.01899500  |
| C | -5.87528700 | 2.41641100  | 0.03380500  |
| C | -5.80358500 | 1.99044900  | -1.30374100 |
| C | -5.01955100 | 0.91426600  | -1.69513100 |
| H | -5.18511200 | 2.02785500  | 2.06852200  |

|   |             |             |             |
|---|-------------|-------------|-------------|
| H | -6.50840300 | 3.26158800  | 0.30159300  |
| H | -6.37825300 | 2.53127000  | -2.05833900 |
| H | -4.96092600 | 0.59605500  | -2.73519400 |
| C | 0.29785300  | -1.94819400 | -1.58925300 |
| H | -0.66227300 | -2.44957200 | -1.76247400 |
| H | 0.27811200  | -1.00438000 | -2.14958300 |
| H | 1.12390000  | -2.56485800 | -1.96981700 |
| H | 5.42827800  | 2.03203000  | 1.22997000  |
| H | 6.20225100  | 0.46900200  | 1.50552000  |
| C | 7.65262900  | 2.00209000  | -0.24602200 |
| H | 8.23362300  | 2.15537400  | -1.16592200 |
| H | 7.42695100  | 2.98892300  | 0.18126100  |
| H | 8.29982300  | 1.47094700  | 0.46936800  |
| C | 6.72293400  | -0.14722800 | -1.13034300 |
| H | 7.32750300  | -0.74841900 | -0.43210900 |
| H | 5.81810400  | -0.72126500 | -1.36484500 |
| H | 7.30362700  | -0.02746100 | -2.05538100 |

### 3

|   |             |             |             |
|---|-------------|-------------|-------------|
| C | 4.14998200  | 0.20543000  | 0.64900800  |
| C | 3.02420200  | 0.90551600  | 0.20588400  |
| C | 1.83764400  | 0.25394900  | -0.09967200 |
| C | 1.73246700  | -1.13604500 | 0.03655200  |
| C | 2.85506000  | -1.83395700 | 0.48387600  |
| C | 4.04452700  | -1.17739300 | 0.78426400  |
| H | 3.08139000  | 1.99260900  | 0.10882100  |
| H | 0.95244600  | 0.80786400  | -0.40550100 |
| H | 2.79113800  | -2.91709900 | 0.60219100  |
| H | 4.90901300  | -1.74730000 | 1.13314300  |
| C | 5.43506500  | 0.93039500  | 0.93476700  |
| C | 0.48154300  | -1.88499600 | -0.33130300 |
| H | 0.57643000  | -2.92120200 | 0.02251300  |
| C | -0.83398500 | -1.30220300 | 0.25818800  |

|   |             |             |             |
|---|-------------|-------------|-------------|
| C | 6.20717600  | 1.35077000  | -0.32261500 |
| H | 5.53189100  | 1.97583100  | -0.93318900 |
| O | -1.57133900 | -2.23356000 | 0.72000300  |
| N | -3.63002300 | -1.45245200 | 0.53959100  |
| O | -1.07284400 | -0.10158600 | 0.13268500  |
| C | -3.81397900 | -0.41753400 | 1.44325500  |
| C | -3.65753600 | -0.95178300 | -0.75025900 |
| O | -3.38687300 | -1.54103400 | -1.78247800 |
| O | -3.72616600 | -0.46445500 | 2.65541200  |
| C | -4.14579000 | 0.46899100  | -0.68015300 |
| C | -4.23440100 | 0.79873900  | 0.66198200  |
| C | -4.66257100 | 2.04617900  | 1.07406600  |
| C | -5.00238700 | 2.97087600  | 0.08371800  |
| C | -4.91246700 | 2.63839500  | -1.27005200 |
| C | -4.47969900 | 1.37230200  | -1.67114800 |
| H | -4.72238400 | 2.28729400  | 2.13495900  |
| H | -5.34065800 | 3.96829400  | 0.36601200  |
| H | -5.18211000 | 3.38216000  | -2.02047300 |
| H | -4.39864400 | 1.09549900  | -2.72183800 |
| C | 0.25546400  | -1.90696000 | -1.84663200 |
| H | -0.67616300 | -2.43914300 | -2.08026300 |
| H | 0.15427600  | -0.88239300 | -2.22625200 |
| H | 1.09487800  | -2.39279700 | -2.36404200 |
| H | 5.22927400  | 1.83337300  | 1.53366900  |
| H | 6.09741400  | 0.29560300  | 1.54967000  |
| C | 7.42565300  | 2.17916000  | 0.05828600  |
| H | 7.98161200  | 2.51316600  | -0.82875400 |
| H | 7.14591500  | 3.06927100  | 0.63867600  |
| H | 8.11574800  | 1.58362300  | 0.67630500  |
| C | 6.61702700  | 0.14203100  | -1.15071200 |
| H | 7.27053800  | -0.52084100 | -0.56070600 |
| H | 5.74558100  | -0.44545200 | -1.46483700 |
| H | 7.17236400  | 0.44272000  | -2.05000400 |

**TS2**

|   |             |             |             |
|---|-------------|-------------|-------------|
| C | 4.19380600  | 0.01949300  | 0.58751900  |
| C | 3.31249900  | 1.08198800  | 0.37288400  |
| C | 2.06705200  | 0.88020500  | -0.20450600 |
| C | 1.66097700  | -0.39913300 | -0.60263300 |
| C | 2.53624400  | -1.46632700 | -0.36746200 |
| C | 3.77993000  | -1.26021100 | 0.21186500  |
| H | 3.61038600  | 2.08804000  | 0.67714200  |
| H | 1.39158800  | 1.72235600  | -0.34355700 |
| H | 2.21373800  | -2.47295300 | -0.63590600 |
| H | 4.44875800  | -2.10678100 | 0.38082800  |
| C | 5.55373000  | 0.26634200  | 1.17567800  |
| C | 0.33226700  | -0.66244400 | -1.20696800 |
| H | 0.34585700  | -1.59839700 | -1.77431900 |
| C | -0.70744800 | -0.99321800 | 0.09289900  |
| C | 6.56006000  | 0.86898900  | 0.18598100  |
| O | -0.81334000 | -2.21499800 | 0.18397100  |
| N | -3.62281400 | -1.83334700 | 0.23468000  |
| O | -1.12517600 | 0.01574800  | 0.63249600  |
| C | -4.14509900 | -1.10085800 | 1.28235100  |
| C | -3.53429900 | -1.01665400 | -0.86205400 |
| O | -3.07386600 | -1.29830800 | -1.96755700 |
| O | -4.35387300 | -1.48454800 | 2.42362500  |
| C | -4.11371700 | 0.33692000  | -0.53524400 |
| C | -4.49079200 | 0.28689100  | 0.79507800  |
| C | -5.07185700 | 1.37061300  | 1.42342000  |
| C | -5.26381800 | 2.52987500  | 0.66572500  |
| C | -4.88166400 | 2.58098100  | -0.67640900 |
| C | -4.29785600 | 1.47341000  | -1.29869000 |
| H | -5.36071500 | 1.31244400  | 2.47275200  |
| H | -5.71588900 | 3.40992100  | 1.12486200  |
| H | -5.04259300 | 3.49952400  | -1.24206600 |

|   |             |             |             |
|---|-------------|-------------|-------------|
| H | -3.99466600 | 1.49351700  | -2.34589400 |
| C | -0.32180800 | 0.44233300  | -2.00017800 |
| H | -1.31077800 | 0.10918600  | -2.34319700 |
| H | -0.46988400 | 1.33941700  | -1.38893700 |
| H | 0.29264700  | 0.69632200  | -2.87751700 |
| H | 5.46770600  | 0.94484600  | 2.04059100  |
| H | 5.97346100  | -0.67826900 | 1.56325200  |
| C | 7.86458900  | 1.19853200  | 0.89702600  |
| H | 8.59367800  | 1.65448700  | 0.21308600  |
| H | 7.70647600  | 1.89076900  | 1.73550600  |
| H | 8.32075200  | 0.28285000  | 1.30432200  |
| H | 6.12316700  | 1.80596000  | -0.20266700 |
| C | 6.80999800  | -0.06480200 | -0.98895200 |
| H | 7.22063200  | -1.02366200 | -0.63394400 |
| H | 5.88499100  | -0.28290200 | -1.53681700 |
| H | 7.53366600  | 0.36605000  | -1.69453500 |

**Ir<sup>IV+</sup> Npht<sup>-</sup>**

|   |             |             |             |
|---|-------------|-------------|-------------|
| C | 0.55933400  | 2.24909700  | 3.74216900  |
| C | 1.20154600  | 1.68150600  | 2.64139600  |
| C | 0.51818600  | 0.77229100  | 1.83053800  |
| C | -0.78975700 | 0.39692900  | 2.16555000  |
| C | -1.43650200 | 0.99386300  | 3.25266300  |
| C | -0.75858600 | 1.91572800  | 4.03763100  |
| H | 1.09242300  | 2.97215600  | 4.35927500  |
| H | 2.22736200  | 1.97081300  | 2.40948700  |
| H | -2.48787900 | 0.79027900  | 3.44328200  |
| H | -1.26787900 | 2.38598100  | 4.87634000  |
| C | -3.20009300 | -2.08135000 | 0.65494400  |
| C | -2.65970600 | -1.19404200 | 1.56783800  |
| C | -2.48053300 | -2.39086500 | -0.49498000 |
| C | -1.42031500 | -0.60490100 | 1.31050100  |
| H | -3.22524100 | -0.89608600 | 2.44610600  |



|   |             |             |             |
|---|-------------|-------------|-------------|
| C | -1.23928200 | -1.80849000 | -0.67078600 |
| H | -2.87831000 | -3.05796500 | -1.25470400 |
| N | -0.70521800 | -0.94950900 | 0.21124100  |
| H | -0.64375000 | -2.02587400 | -1.55505600 |
| H | -4.18852200 | -2.50637000 | 0.82335500  |
| C | 1.59131600  | -1.94783700 | -3.84735900 |
| C | 1.32999500  | -0.99047700 | -2.87038300 |
| C | 1.64414100  | -1.24426000 | -1.53534400 |
| C | 2.19533000  | -2.49245700 | -1.18682000 |
| C | 2.44780100  | -3.45295700 | -2.17131900 |
| C | 2.14573000  | -3.17884700 | -3.49742900 |
| H | 1.35373600  | -1.73724500 | -4.88912700 |
| H | 0.87193800  | -0.04221600 | -3.15424900 |
| H | 2.87732600  | -4.42041400 | -1.91151200 |
| H | 2.33710700  | -3.92861400 | -4.26250600 |
| C | 3.25197000  | -3.91691900 | 2.15285800  |
| C | 3.01924200  | -3.84883700 | 0.79028100  |
| C | 2.93034400  | -2.82470300 | 2.95256200  |
| C | 2.46974300  | -2.69392000 | 0.23226600  |
| H | 3.26461700  | -4.69016500 | 0.14744200  |
| C | 2.38242300  | -1.70520300 | 2.35219800  |
| H | 3.09553500  | -2.83353100 | 4.02610600  |
| N | 2.15666700  | -1.63767700 | 1.03100800  |
| H | 2.10837500  | -0.81965300 | 2.92302700  |
| H | 3.68258300  | -4.81560400 | 2.58960200  |
| C | 5.43922800  | 1.42753800  | 0.18368900  |
| C | 4.32718500  | 0.61414700  | 0.35366300  |
| C | 3.06202000  | 1.01239500  | -0.10959200 |
| C | 2.95774200  | 2.26588300  | -0.77438100 |
| C | 4.07896000  | 3.07497100  | -0.94077500 |
| C | 5.31595900  | 2.65917300  | -0.46111700 |
| H | 6.41172900  | 1.10463400  | 0.55233300  |
| H | 4.44123000  | -0.34791900 | 0.85436600  |

|    |             |             |             |
|----|-------------|-------------|-------------|
| H  | 3.99765300  | 4.03766600  | -1.44467800 |
| H  | 6.18872500  | 3.29581500  | -0.59326100 |
| C  | -0.05050300 | 3.95779300  | -2.34463000 |
| C  | 1.26962100  | 3.77000200  | -1.94055400 |
| C  | -0.99905100 | 2.99361600  | -2.04797900 |
| C  | 1.62161700  | 2.61899700  | -1.25151500 |
| H  | 2.02690400  | 4.51763100  | -2.16457700 |
| C  | -0.59852600 | 1.86298300  | -1.34778500 |
| H  | -2.04621500 | 3.04981600  | -2.33264700 |
| N  | 0.67220700  | 1.68248500  | -0.97171300 |
| H  | -1.32966100 | 1.10377000  | -1.08490500 |
| H  | -0.32685500 | 4.85862100  | -2.88906100 |
| Ir | 1.34783600  | 0.03377700  | 0.06083500  |
| N  | -3.47511500 | 1.49710300  | -0.10979600 |
| C  | -3.89303400 | 0.91801400  | -1.27122600 |
| C  | -4.35862700 | 1.16328700  | 0.87862600  |
| O  | -4.28976600 | 1.43276600  | 2.07686300  |
| O  | -3.32552000 | 0.96783000  | -2.36695000 |
| C  | -5.45600100 | 0.29495400  | 0.30796500  |
| C  | -5.15573700 | 0.12812400  | -1.03301600 |
| C  | -5.90958900 | -0.69488300 | -1.84742300 |
| C  | -6.99658300 | -1.35583600 | -1.26534500 |
| C  | -7.30107000 | -1.18564700 | 0.08686400  |
| C  | -6.52503700 | -0.35110200 | 0.89869600  |
| H  | -5.65464400 | -0.82288300 | -2.89921000 |
| H  | -7.61751700 | -2.01524500 | -1.87147800 |
| H  | -8.15506900 | -1.71362100 | 0.51075600  |
| H  | -6.74198200 | -0.21277300 | 1.95790200  |

**\*Ir<sup>III</sup>**

|   |             |            |            |
|---|-------------|------------|------------|
| C | 0.11782700  | 3.71388100 | 2.41762600 |
| C | 0.47032200  | 2.48290000 | 1.87128700 |
| C | -0.33698600 | 1.86244800 | 0.91029700 |

|   |             |             |             |
|---|-------------|-------------|-------------|
| C | -1.50389500 | 2.52979900  | 0.49581600  |
| C | -1.84929200 | 3.77196900  | 1.04368700  |
| C | -1.04465500 | 4.36220300  | 2.00455500  |
| H | 0.75779200  | 4.17299900  | 3.17102400  |
| H | 1.38473600  | 1.99345100  | 2.20979700  |
| H | -2.75068900 | 4.29024400  | 0.71650900  |
| H | -1.31732600 | 5.32754300  | 2.42717900  |
| C | -4.23399400 | 1.61028600  | -1.95429200 |
| C | -3.55233900 | 2.32453900  | -0.98346200 |
| C | -3.67225200 | 0.44295600  | -2.45914100 |
| C | -2.31449700 | 1.86384300  | -0.52465300 |
| H | -3.98148800 | 3.23384200  | -0.57040800 |
| C | -2.44361300 | 0.03902100  | -1.96069100 |
| H | -4.17289400 | -0.15099600 | -3.21902900 |
| N | -1.77982000 | 0.72711700  | -1.02655800 |
| H | -1.95450800 | -0.86821900 | -2.31650800 |
| H | -5.20093300 | 1.96040000  | -2.31152200 |
| C | 0.39890200  | -3.03284800 | -3.07916700 |
| C | 0.54747200  | -1.82543000 | -2.39949700 |
| C | -0.02513000 | -1.63577400 | -1.14411400 |
| C | -0.82420600 | -2.66918600 | -0.54935700 |
| C | -0.93624700 | -3.89817300 | -1.24400600 |
| C | -0.34763800 | -4.06332600 | -2.48119700 |
| H | 0.86144400  | -3.18157500 | -4.05338700 |
| H | 1.13473900  | -1.02463600 | -2.85535600 |
| H | -1.50361500 | -4.72110000 | -0.80816000 |
| H | -0.46853400 | -5.01171700 | -3.00462000 |
| C | -2.79175400 | -2.84971200 | 2.65728700  |
| C | -2.25057200 | -3.24659100 | 1.46179000  |
| C | -2.52143800 | -1.53785400 | 3.13673500  |
| C | -1.43617600 | -2.37896800 | 0.70396800  |
| H | -2.44339200 | -4.24764500 | 1.07872200  |
| C | -1.71787800 | -0.71954500 | 2.38326600  |

|                         |             |             |             |
|-------------------------|-------------|-------------|-------------|
| H                       | -2.93016400 | -1.17795900 | 4.07674000  |
| N                       | -1.17419800 | -1.09862900 | 1.20776600  |
| H                       | -1.46008500 | 0.28737700  | 2.71191300  |
| H                       | -3.41681400 | -3.52986100 | 3.23229400  |
| C                       | 3.05115800  | -1.75915200 | 2.72941700  |
| C                       | 1.82988300  | -1.39533800 | 2.17816700  |
| C                       | 1.77417500  | -0.58658800 | 1.03196200  |
| C                       | 3.00029200  | -0.16383100 | 0.44647700  |
| C                       | 4.22288900  | -0.54642400 | 1.00365800  |
| C                       | 4.24772100  | -1.33709800 | 2.14336500  |
| H                       | 3.07819000  | -2.38443200 | 3.62081200  |
| H                       | 0.90367000  | -1.74806100 | 2.63175900  |
| H                       | 5.16303700  | -0.23047000 | 0.55106900  |
| H                       | 5.20162700  | -1.63182500 | 2.57712900  |
| C                       | 3.65234100  | 2.05098000  | -2.54900100 |
| C                       | 3.92226400  | 1.22984300  | -1.46969400 |
| C                       | 2.32555200  | 2.33195400  | -2.87962700 |
| C                       | 2.87235100  | 0.68303900  | -0.72747100 |
| H                       | 4.94902200  | 1.00477000  | -1.19113500 |
| C                       | 1.32396700  | 1.76116300  | -2.11686000 |
| H                       | 2.06991800  | 2.97730500  | -3.71524600 |
| N                       | 1.58392700  | 0.95010200  | -1.08247600 |
| H                       | 0.26879200  | 1.92950900  | -2.32733500 |
| H                       | 4.46808500  | 2.47554500  | -3.13053700 |
| Ir                      | 0.14574900  | -0.00369500 | 0.08083600  |
| <b>+Ir<sup>IV</sup></b> |             |             |             |
| C                       | -0.80416100 | 3.45698900  | -2.59849600 |
| C                       | -0.93852300 | 2.21338000  | -1.98349500 |
| C                       | -0.04737600 | 1.81950900  | -0.98098100 |
| C                       | 0.97235400  | 2.70433700  | -0.59501100 |
| C                       | 1.09752800  | 3.95273100  | -1.21787200 |
| C                       | 0.21495300  | 4.32656000  | -2.21829000 |
| H                       | -1.50390300 | 3.74735300  | -3.38094800 |

|   |             |             |             |
|---|-------------|-------------|-------------|
| H | -1.74170700 | 1.54829000  | -2.30164500 |
| H | 1.88665200  | 4.64353700  | -0.92416900 |
| H | 0.31673700  | 5.29682700  | -2.69920200 |
| C | 3.69369700  | 2.49457100  | 2.01841300  |
| C | 2.92885900  | 2.99985900  | 0.98212600  |
| C | 3.38042500  | 1.24519800  | 2.54414300  |
| C | 1.85932200  | 2.25572700  | 0.47635800  |
| H | 3.15728500  | 3.97479900  | 0.56047800  |
| C | 2.31515400  | 0.55225300  | 1.99662000  |
| H | 3.94764100  | 0.81004500  | 3.36196900  |
| N | 1.57042000  | 1.03318400  | 0.98966700  |
| H | 2.03504600  | -0.42887000 | 2.37640400  |
| H | 4.52644100  | 3.07124100  | 2.41536400  |
| C | 0.39623700  | -3.12950100 | 3.03607600  |
| C | -0.08783100 | -2.00455700 | 2.37186500  |
| C | 0.40010100  | -1.66643800 | 1.11073800  |
| C | 1.41558100  | -2.45693100 | 0.53106700  |
| C | 1.89935100  | -3.58133300 | 1.20496400  |
| C | 1.39182200  | -3.91287100 | 2.45432000  |
| H | -0.00269500 | -3.39829100 | 4.01275500  |
| H | -0.85945500 | -1.39431700 | 2.84379800  |
| H | 2.67469900  | -4.20699100 | 0.76441700  |
| H | 1.77475200  | -4.78555100 | 2.97868800  |
| C | 3.26347500  | -2.17776200 | -2.76026300 |
| C | 2.89536500  | -2.67190400 | -1.51982000 |
| C | 2.63594000  | -1.03830900 | -3.25448100 |
| C | 1.90332100  | -2.02991200 | -0.77952400 |
| H | 3.37351500  | -3.56232300 | -1.12051000 |
| C | 1.66166000  | -0.43383300 | -2.48091600 |
| H | 2.89234300  | -0.62015900 | -4.22343800 |
| N | 1.30475900  | -0.91436300 | -1.27892300 |
| H | 1.13060600  | 0.45660200  | -2.81236600 |
| H | 4.03414200  | -2.67998800 | -3.34066800 |

|    |             |             |             |
|----|-------------|-------------|-------------|
| C  | -2.82591200 | -2.32604900 | -2.57077600 |
| C  | -1.65601600 | -1.79115500 | -2.05092700 |
| C  | -1.68909100 | -0.93605800 | -0.93489900 |
| C  | -2.95466500 | -0.64878800 | -0.34679300 |
| C  | -4.12220700 | -1.19118600 | -0.87552900 |
| C  | -4.05832600 | -2.02658000 | -1.98646600 |
| H  | -2.78498700 | -2.98519500 | -3.43579800 |
| H  | -0.70217700 | -2.04294800 | -2.51340700 |
| H  | -5.09181800 | -0.97149100 | -0.43072400 |
| H  | -4.97269000 | -2.44936900 | -2.39674500 |
| C  | -3.83449000 | 1.50433100  | 2.63904100  |
| C  | -4.01899400 | 0.65712800  | 1.55799900  |
| C  | -2.54843900 | 1.92451600  | 2.96526600  |
| C  | -2.92029400 | 0.23407100  | 0.81318500  |
| H  | -5.01633300 | 0.32078100  | 1.28708700  |
| C  | -1.49146700 | 1.47624000  | 2.19304900  |
| H  | -2.36193100 | 2.59205900  | 3.80136800  |
| N  | -1.67126700 | 0.65042100  | 1.15250000  |
| H  | -0.46325200 | 1.77003300  | 2.39477400  |
| H  | -4.68897300 | 1.83768300  | 3.22336700  |
| Ir | -0.15521400 | -0.06095900 | -0.06399600 |

### Ar-radical

|   |             |             |             |
|---|-------------|-------------|-------------|
| C | 0.54494600  | 0.02707000  | -0.62921000 |
| C | -0.23841000 | -1.10364500 | -0.35546900 |
| C | -1.58718400 | -0.99946600 | -0.07789500 |
| C | -2.23532600 | 0.26408400  | -0.05842500 |
| C | -1.43230700 | 1.40085200  | -0.33656900 |
| C | -0.08529100 | 1.27939900  | -0.61265800 |
| H | 0.23415800  | -2.08790000 | -0.36969600 |
| H | -2.16643000 | -1.89965500 | 0.12516400  |
| H | -1.90261000 | 2.38492400  | -0.33069400 |
| H | 0.50769900  | 2.17163000  | -0.82167000 |

|   |             |             |             |
|---|-------------|-------------|-------------|
| C | 2.01554900  | -0.11155200 | -0.89167400 |
| C | -3.60860700 | 0.40695600  | 0.21808400  |
| H | -4.01850900 | 1.41812000  | 0.20944500  |
| C | 2.85118300  | -0.37497500 | 0.36969300  |
| H | 2.45689900  | -1.29014100 | 0.84604100  |
| C | -4.52394700 | -0.72662900 | 0.51826000  |
| H | -5.54581500 | -0.37912900 | 0.70207300  |
| H | -4.56786300 | -1.45379300 | -0.30886900 |
| H | -4.20416600 | -1.29279700 | 1.40821800  |
| H | 2.39820900  | 0.80320400  | -1.37562500 |
| H | 2.19002700  | -0.93527500 | -1.60338800 |
| C | 2.73238000  | 0.77131000  | 1.36318100  |
| H | 1.69535600  | 0.92644500  | 1.68671900  |
| H | 3.34328400  | 0.58712400  | 2.25686200  |
| H | 3.08491400  | 1.71038500  | 0.90782800  |
| C | 4.30600400  | -0.61140900 | -0.00830500 |
| H | 4.92020900  | -0.82989900 | 0.87529400  |
| H | 4.41318100  | -1.44887900 | -0.71098000 |
| H | 4.72752200  | 0.28366000  | -0.49079100 |

**CO<sub>2</sub>**

|   |            |            |             |
|---|------------|------------|-------------|
| C | 0.00000000 | 0.00000000 | 0.00000000  |
| O | 0.00000000 | 0.00000000 | 1.16414500  |
| O | 0.00000000 | 0.00000000 | -1.16414500 |

**5**

|   |             |             |             |
|---|-------------|-------------|-------------|
| C | 3.06968400  | 1.30292700  | -1.71711300 |
| O | 2.12180100  | 2.19373500  | -1.07381500 |
| C | 2.52715500  | -0.09894000 | -1.35115600 |
| H | 2.39249900  | -0.76967200 | -2.20959400 |
| C | 1.11291700  | 1.43355000  | -0.60874900 |
| N | 1.21269300  | 0.16837600  | -0.75070500 |
| C | -0.00005800 | 2.18730800  | 0.00024300  |
| C | 0.34782900  | 3.52701800  | 0.64886200  |

|   |             |             |             |
|---|-------------|-------------|-------------|
| C | -0.34822000 | 3.52691600  | -0.64854400 |
| H | 1.40509400  | 3.77535700  | 0.67366300  |
| H | -0.22001700 | 3.77417000  | 1.54170200  |
| H | 0.21957000  | 3.77401300  | -1.54143100 |
| H | -1.40554800 | 3.77497800  | -0.67332600 |
| C | -3.06983800 | 1.30255000  | 1.71735000  |
| O | -2.12205500 | 2.19348700  | 1.07404100  |
| C | -2.52722400 | -0.09921400 | 1.35123200  |
| H | -2.39272200 | -0.77012200 | 2.20955900  |
| C | -1.11301300 | 1.43340100  | 0.60910500  |
| N | -1.21264300 | 0.16823200  | 0.75105100  |
| C | 5.57199300  | -0.01280400 | 0.75510800  |
| C | 5.49718600  | -1.19007000 | 1.49349100  |
| C | 4.43827900  | -2.07992700 | 1.31072100  |
| C | 3.43306000  | -1.80633100 | 0.38810700  |
| C | 3.51153100  | -0.62435700 | -0.34049900 |
| C | 4.56900300  | 0.26609400  | -0.16599700 |
| H | 6.40307600  | 0.67781500  | 0.89769700  |
| H | 6.27477400  | -1.42021500 | 2.22014100  |
| H | 4.39540200  | -2.99790000 | 1.89364700  |
| H | 2.59928700  | -2.49649800 | 0.24629000  |
| C | 4.45696800  | 1.44516400  | -1.09404900 |
| H | 4.55810600  | 2.41656900  | -0.59144500 |
| H | 5.22939000  | 1.41589400  | -1.87642300 |
| C | -3.43278800 | -1.80620500 | -0.38860800 |
| C | -3.51141700 | -0.62442200 | 0.34028100  |
| C | -4.56891400 | 0.26603500  | 0.16584800  |
| C | -5.57169900 | -0.01262900 | -0.75554000 |
| C | -5.49670600 | -1.18968600 | -1.49425100 |
| C | -4.43782900 | -2.07956800 | -1.31149600 |
| H | -2.59906600 | -2.49643500 | -0.24678400 |
| H | -6.40278200 | 0.67799700  | -0.89810200 |
| H | -6.27413800 | -1.41963100 | -2.22113000 |



|    |             |             |             |
|----|-------------|-------------|-------------|
| H  | -4.39482700 | -2.99740500 | -1.89463000 |
| C  | -4.45717000 | 1.44472000  | 1.09441000  |
| H  | -4.55871200 | 2.41636100  | 0.59234900  |
| H  | -3.04156000 | 1.54011000  | 2.78655000  |
| H  | -5.22949400 | 1.41477500  | 1.87686500  |
| H  | 3.04145600  | 1.54053400  | -2.78630300 |
| C  | -0.00048000 | -3.20374100 | 0.00040900  |
| N  | -0.00114200 | -4.37479600 | 0.00086800  |
| Cu | 0.00029000  | -1.32785800 | -0.00015900 |

**6**

|   |             |             |             |
|---|-------------|-------------|-------------|
| C | 1.92751200  | 2.49095400  | -2.07764300 |
| O | 0.59303600  | 3.05114100  | -1.92563800 |
| C | 1.97501200  | 1.41733900  | -0.97014400 |
| H | 2.31645900  | 0.43131400  | -1.30549100 |
| C | -0.07393900 | 2.26489800  | -1.07285700 |
| N | 0.57456600  | 1.30517000  | -0.52889000 |
| C | -1.48534200 | 2.62437200  | -0.86850800 |
| C | -1.83858000 | 4.10980000  | -0.95588400 |
| C | -2.22506700 | 3.22478800  | -2.06523700 |
| H | -0.99616700 | 4.78212200  | -1.09324000 |
| H | -2.60755000 | 4.44496300  | -0.26513300 |
| H | -1.65344600 | 3.26576800  | -2.98832200 |
| H | -3.26683600 | 2.93254800  | -2.16284200 |
| C | -4.15664900 | 1.31184800  | 1.20010400  |
| O | -3.55973400 | 2.17318600  | 0.18734200  |
| C | -3.09274000 | 0.21091500  | 1.37484000  |
| H | -2.84373900 | -0.03552000 | 2.41346000  |
| C | -2.28279100 | 1.79931000  | 0.05129600  |
| N | -1.89802400 | 0.77402400  | 0.71497500  |
| C | 4.16252200  | 4.00687100  | 0.52170500  |
| C | 4.42521800  | 3.52311200  | 1.80006800  |
| C | 3.90761100  | 2.29703200  | 2.21736700  |

|    |             |             |             |
|----|-------------|-------------|-------------|
| C  | 3.11029000  | 1.53397100  | 1.36878900  |
| C  | 2.84459700  | 2.02978300  | 0.09684300  |
| C  | 3.36638200  | 3.25038200  | -0.32971600 |
| H  | 4.57445500  | 4.96167800  | 0.19519800  |
| H  | 5.04538100  | 4.10583000  | 2.47939300  |
| H  | 4.13013500  | 1.92679300  | 3.21616700  |
| H  | 2.73049900  | 0.56290200  | 1.69573400  |
| C  | 2.98402900  | 3.54257900  | -1.75508500 |
| H  | 2.58810900  | 4.55455600  | -1.91453800 |
| H  | 3.84344600  | 3.43207500  | -2.43252000 |
| C  | -3.02700100 | -2.15715500 | 0.29166000  |
| C  | -3.65233600 | -0.95508100 | 0.60059000  |
| C  | -4.94482300 | -0.67984800 | 0.15594900  |
| C  | -5.63258000 | -1.60721800 | -0.61696800 |
| C  | -5.00652500 | -2.80750800 | -0.93948500 |
| C  | -3.71560300 | -3.08086800 | -0.48775600 |
| H  | -2.02392000 | -2.37205100 | 0.65923000  |
| H  | -6.64333700 | -1.39827600 | -0.96710200 |
| H  | -5.53025200 | -3.54132000 | -1.54996800 |
| H  | -3.23914800 | -4.02374700 | -0.74831800 |
| C  | -5.42000300 | 0.65731600  | 0.65499800  |
| H  | -5.88653400 | 1.28523000  | -0.11580900 |
| H  | -4.32048100 | 1.94167400  | 2.08155700  |
| H  | -6.15982400 | 0.54638600  | 1.46142600  |
| H  | 1.98157700  | 2.10075400  | -3.09960600 |
| C  | -0.49259800 | -1.09540000 | 2.39633900  |
| N  | -0.89691900 | -1.64537400 | 3.34533600  |
| Cu | -0.06063000 | -0.14520000 | 0.75208200  |
| N  | 1.31231800  | -1.42420000 | 0.17229600  |
| C  | 2.32333900  | -2.05160900 | 0.88079400  |
| C  | 0.98246800  | -2.14681600 | -0.95620600 |
| O  | 0.09037400  | -1.86339200 | -1.74128300 |
| O  | 2.82165600  | -1.67234300 | 1.92316800  |

|   |            |             |             |
|---|------------|-------------|-------------|
| C | 1.90978400 | -3.31787500 | -1.02989900 |
| C | 2.72164200 | -3.26316000 | 0.09561100  |
| C | 3.69683800 | -4.21191000 | 0.33401900  |
| C | 3.83328800 | -5.23825800 | -0.60330000 |
| C | 3.01689500 | -5.29485200 | -1.73447100 |
| C | 2.03642000 | -4.32708200 | -1.96567100 |
| H | 4.32354700 | -4.15414200 | 1.22222500  |
| H | 4.58611300 | -6.01021200 | -0.45170600 |
| H | 3.14817100 | -6.10932900 | -2.44518500 |
| H | 1.39174200 | -4.35905300 | -2.84255500 |

### **Ir<sup>III</sup>**

|   |             |             |             |
|---|-------------|-------------|-------------|
| C | 0.57676300  | -3.52441100 | 2.64328300  |
| C | 0.01205400  | -2.38949000 | 2.07164400  |
| C | 0.61315400  | -1.71903300 | 0.99574600  |
| C | 1.83318500  | -2.26087600 | 0.51636900  |
| C | 2.40242800  | -3.40695600 | 1.09172100  |
| C | 1.77823700  | -4.03880600 | 2.15395700  |
| H | 0.07937300  | -4.01778200 | 3.47902600  |
| H | -0.92793600 | -2.00657600 | 2.47596000  |
| H | 3.33994700  | -3.81694500 | 0.71410600  |
| H | 2.22140300  | -4.92853400 | 2.59845900  |
| C | 4.19664700  | -1.20141200 | -2.24977100 |
| C | 3.68526100  | -1.93163400 | -1.19247700 |
| C | 3.49439000  | -0.09460400 | -2.72126500 |
| C | 2.46991100  | -1.56092500 | -0.60221600 |
| H | 4.22709900  | -2.79533400 | -0.81582600 |
| C | 2.30080700  | 0.22902500  | -2.09945100 |
| H | 3.86034600  | 0.50669300  | -3.54918800 |
| N | 1.80126100  | -0.47779100 | -1.07704800 |
| H | 1.69900300  | 1.08182200  | -2.41600500 |
| H | 5.14117900  | -1.49229200 | -2.70644800 |
| C | -1.28367000 | 3.24604200  | -2.77305000 |

|   |             |             |             |
|---|-------------|-------------|-------------|
| C | -1.18886600 | 1.99061300  | -2.18184400 |
| C | -0.43237100 | 1.77585100  | -1.02210900 |
| C | 0.22704100  | 2.90373200  | -0.47678500 |
| C | 0.13490900  | 4.16985500  | -1.07020000 |
| C | -0.61862500 | 4.34195100  | -2.21976600 |
| H | -1.88293100 | 3.37964500  | -3.67435000 |
| H | -1.72603000 | 1.15343900  | -2.63636300 |
| H | 0.65227400  | 5.02953100  | -0.64193500 |
| H | -0.69304900 | 5.32411800  | -2.68353700 |
| C | 2.36827300  | 3.27212700  | 2.62307000  |
| C | 1.68152700  | 3.62143500  | 1.47525900  |
| C | 2.37580300  | 1.94084400  | 3.03190000  |
| C | 1.00100100  | 2.65021300  | 0.73375000  |
| H | 1.65659100  | 4.65689400  | 1.14532800  |
| C | 1.69163600  | 1.01514300  | 2.26646200  |
| H | 2.89782200  | 1.61957500  | 3.92898900  |
| N | 1.02274200  | 1.35101500  | 1.15055600  |
| H | 1.64895900  | -0.03845400 | 2.53656000  |
| H | 2.89180200  | 4.03227900  | 3.19997000  |
| C | -3.19779900 | 0.95827600  | 2.85849400  |
| C | -1.96321600 | 0.94347700  | 2.22391500  |
| C | -1.75845300 | 0.21408900  | 1.04269400  |
| C | -2.87226700 | -0.49428100 | 0.52412000  |
| C | -4.11621000 | -0.47477800 | 1.16809500  |
| C | -4.28221700 | 0.24780000  | 2.33596500  |
| H | -3.32406100 | 1.53216600  | 3.77688800  |
| H | -1.13918300 | 1.51150200  | 2.65927100  |
| H | -4.96025900 | -1.03108400 | 0.75826900  |
| H | -5.24659200 | 0.26349400  | 2.84034600  |
| C | -3.16948100 | -2.62092800 | -2.58857400 |
| C | -3.54625700 | -1.97442800 | -1.42719800 |
| C | -1.84702800 | -2.52663700 | -3.02117600 |
| C | -2.61219800 | -1.23239400 | -0.69687100 |

|    |             |             |             |
|----|-------------|-------------|-------------|
| H  | -4.57271600 | -2.03118700 | -1.07309300 |
| C  | -0.96014000 | -1.78638800 | -2.26447900 |
| H  | -1.50532600 | -3.01882100 | -3.92755600 |
| N  | -1.32349400 | -1.15306100 | -1.13733600 |
| H  | 0.08436000  | -1.67556400 | -2.54993800 |
| H  | -3.89817800 | -3.19534800 | -3.15720000 |
| Ir | -0.06484200 | 0.00286600  | 0.00350400  |

### TMSCN

|    |             |             |             |
|----|-------------|-------------|-------------|
| Si | 0.31236900  | 0.00008200  | -0.00000500 |
| C  | 0.85302400  | -0.75445400 | 1.62344200  |
| H  | 0.48236300  | -0.17362900 | 2.47645600  |
| H  | 0.48271500  | -1.78113700 | 1.72912500  |
| H  | 1.94846500  | -0.78378800 | 1.68698200  |
| C  | 0.85305300  | -1.02883900 | -1.46502500 |
| H  | 0.48266900  | -2.05804400 | -1.38803900 |
| H  | 0.48260600  | -0.60757600 | -2.40720700 |
| H  | 1.94850400  | -1.06900800 | -1.52222000 |
| C  | 0.85307100  | 1.78320600  | -0.15840400 |
| H  | 0.48204200  | 2.23161100  | -1.08774100 |
| H  | 0.48321200  | 2.38810900  | 0.67805100  |
| H  | 1.94852300  | 1.85273000  | -0.16530500 |
| C  | -1.56341100 | 0.00007400  | 0.00003400  |
| N  | -2.72695500 | -0.00004900 | -0.00004600 |

### TMSNPhth

|   |             |             |             |
|---|-------------|-------------|-------------|
| N | 0.56802900  | 0.07247100  | -0.00012500 |
| C | -0.26868800 | 1.20649100  | -0.00005000 |
| C | -0.20540600 | -1.10146700 | -0.00014300 |
| O | 0.23546700  | -2.23060700 | -0.00019900 |
| O | 0.08737700  | 2.36213300  | -0.00003400 |
| C | -1.63029200 | -0.68451300 | -0.00007600 |
| C | -1.66833500 | 0.70141800  | -0.00003500 |

|    |             |             |             |
|----|-------------|-------------|-------------|
| C  | -2.86454800 | 1.39497500  | 0.00004500  |
| C  | -4.03790400 | 0.63966300  | 0.00009100  |
| C  | -3.99900300 | -0.75717500 | 0.00006500  |
| C  | -2.78523800 | -1.44501700 | -0.00002300 |
| H  | -2.87777600 | 2.48324000  | 0.00008000  |
| H  | -5.00239300 | 1.14420500  | 0.00016800  |
| H  | -4.93387100 | -1.31459600 | 0.00008900  |
| H  | -2.73747600 | -2.53228400 | -0.00008000 |
| Si | 2.38055200  | -0.00282300 | 0.00012000  |
| C  | 2.88270100  | -0.92321000 | 1.54688000  |
| H  | 3.97496000  | -1.02253600 | 1.59951100  |
| H  | 2.55208800  | -0.39392200 | 2.44942900  |
| H  | 2.44673700  | -1.92875000 | 1.55800100  |
| C  | 3.04740400  | 1.73900500  | 0.00025300  |
| H  | 4.14555400  | 1.69682000  | 0.00092100  |
| H  | 2.72503900  | 2.30246600  | -0.88210600 |
| H  | 2.72388900  | 2.30311700  | 0.88174900  |
| C  | 2.88298000  | -0.92263900 | -1.54690100 |
| H  | 2.44697500  | -1.92815600 | -1.55856100 |
| H  | 2.55233600  | -0.39283800 | -2.44915400 |
| H  | 3.97522300  | -1.02193400 | -1.59962100 |

7

|   |             |             |             |
|---|-------------|-------------|-------------|
| C | 2.41597700  | -1.74278700 | 1.52487100  |
| O | 1.15375500  | -2.47465400 | 1.50209400  |
| C | 2.34575700  | -0.94119400 | 0.21429400  |
| H | 2.64079300  | 0.10540600  | 0.34531800  |
| C | 0.38433100  | -1.90903800 | 0.57295400  |
| N | 0.91456100  | -0.99730600 | -0.16132900 |
| C | -0.98123700 | -2.44496000 | 0.50072100  |
| C | -1.14830900 | -3.92127400 | 0.87320700  |
| C | -1.61720300 | -2.89769100 | 1.81737300  |
| H | -0.22494300 | -4.45079800 | 1.09045200  |

|   |             |             |             |
|---|-------------|-------------|-------------|
| H | -1.88398900 | -4.46530600 | 0.28729000  |
| H | -1.03294500 | -2.67982100 | 2.70851600  |
| H | -2.68458300 | -2.71056800 | 1.89979200  |
| C | -3.80447100 | -1.92672500 | -1.69856100 |
| O | -3.08604000 | -2.50243400 | -0.57198700 |
| C | -2.97769500 | -0.66597900 | -2.01371400 |
| H | -2.76879300 | -0.50632700 | -3.07743200 |
| C | -1.89631500 | -1.89662800 | -0.50744400 |
| N | -1.69978400 | -0.91319300 | -1.30700400 |
| C | 4.71019800  | -3.62576200 | -0.75062300 |
| C | 4.85574300  | -3.47283600 | -2.12609400 |
| C | 4.18006500  | -2.45718900 | -2.80165200 |
| C | 3.34976900  | -1.57812100 | -2.11239300 |
| C | 3.20784400  | -1.73285100 | -0.73768600 |
| C | 3.87985500  | -2.75115300 | -0.06044600 |
| H | 5.23560300  | -4.42233200 | -0.22400100 |
| H | 5.50000400  | -4.15370800 | -2.67997600 |
| H | 4.30021900  | -2.35118400 | -3.87831300 |
| H | 2.81976300  | -0.78534500 | -2.63868800 |
| C | 3.58516000  | -2.71065000 | 1.41361700  |
| H | 3.33388000  | -3.68818600 | 1.84626400  |
| H | 4.44019500  | -2.32263800 | 1.98591200  |
| C | -3.43994600 | 1.79016600  | -1.25772800 |
| C | -3.78312700 | 0.44934300  | -1.39162300 |
| C | -5.00411400 | -0.03005000 | -0.91457600 |
| C | -5.89123700 | 0.82086400  | -0.26634800 |
| C | -5.54232600 | 2.15918900  | -0.11102700 |
| C | -4.33104600 | 2.63945700  | -0.60860900 |
| H | -2.49060700 | 2.16136400  | -1.63457400 |
| H | -6.84418300 | 0.44820100  | 0.10906800  |
| H | -6.22393900 | 2.83871500  | 0.39816000  |
| H | -4.07481100 | 3.68983000  | -0.48530400 |
| C | -5.18958100 | -1.48285300 | -1.25265400 |

|    |             |             |             |
|----|-------------|-------------|-------------|
| H  | -5.55061300 | -2.09994700 | -0.41905400 |
| H  | -3.80498500 | -2.68806200 | -2.48707200 |
| H  | -5.90710500 | -1.61284200 | -2.07615100 |
| H  | 2.41325700  | -1.13221900 | 2.43477000  |
| C  | -0.67275200 | 0.94138400  | -3.21707100 |
| N  | -1.15899700 | 1.33337400  | -4.20462900 |
| Cu | 0.00348500  | 0.20582400  | -1.54960500 |
| N  | 1.09426100  | 1.75036200  | 1.48009600  |
| C  | -0.17994600 | 1.55167900  | 1.07620700  |
| C  | 1.23498500  | 1.20615200  | 2.73436700  |
| O  | 2.28061600  | 1.09503400  | 3.36538300  |
| O  | -0.64474100 | 1.80855100  | -0.04849500 |
| C  | -0.09598700 | 0.66754400  | 3.20136600  |
| C  | -0.98207200 | 0.88591100  | 2.15750900  |
| C  | -2.30708600 | 0.49701000  | 2.22780000  |
| C  | -2.72614800 | -0.11702600 | 3.41396500  |
| C  | -1.83468200 | -0.34164600 | 4.46504100  |
| C  | -0.49229100 | 0.04371400  | 4.36853600  |
| H  | -2.99155600 | 0.67514100  | 1.39569200  |
| H  | -3.76632700 | -0.42309000 | 3.52364100  |
| H  | -2.19478000 | -0.82010400 | 5.37507300  |
| H  | 0.21450500  | -0.12514200 | 5.18008100  |
| Si | 2.96527400  | 3.64771800  | -0.17508400 |
| C  | 4.15867900  | 2.93507100  | 1.06723000  |
| H  | 4.71750800  | 3.75241400  | 1.54324200  |
| H  | 3.64259000  | 2.36096000  | 1.84822700  |
| H  | 4.89240500  | 2.28616400  | 0.57033600  |
| C  | 3.90411800  | 4.59747900  | -1.49727000 |
| H  | 4.38062300  | 5.48183800  | -1.05288100 |
| H  | 4.69442500  | 3.98986100  | -1.95542400 |
| H  | 3.23771100  | 4.94563200  | -2.29619200 |
| C  | 1.53405600  | 4.66195900  | 0.47007100  |
| H  | 0.58805000  | 4.28004300  | 0.06773400  |



|   |            |            |             |
|---|------------|------------|-------------|
| H | 1.47580000 | 4.58819600 | 1.56100600  |
| H | 1.64410000 | 5.71494000 | 0.18114000  |
| C | 2.23561900 | 2.19243500 | -1.16788900 |
| N | 1.78161600 | 1.29995000 | -1.75959300 |

### TS3

|   |             |             |             |
|---|-------------|-------------|-------------|
| C | 2.79748700  | -1.24067800 | 1.74997300  |
| O | 1.65449000  | -2.13973000 | 1.92038200  |
| C | 2.51677400  | -0.60273700 | 0.37703300  |
| H | 2.62281300  | 0.48786700  | 0.37871100  |
| C | 0.77003600  | -1.84478700 | 0.97434100  |
| N | 1.10769300  | -0.96244100 | 0.10237500  |
| C | -0.47809300 | -2.62222600 | 1.02136500  |
| C | -0.31888600 | -4.11922300 | 1.34800000  |
| C | -0.89594000 | -3.22058400 | 2.35615200  |
| H | 0.70627600  | -4.45901600 | 1.46954200  |
| H | -0.97822000 | -4.78658900 | 0.79879900  |
| H | -0.28316900 | -2.92477000 | 3.20338100  |
| H | -1.96766200 | -3.25331500 | 2.53300800  |
| C | -3.54470900 | -2.63694200 | -0.90574800 |
| O | -2.69098300 | -2.93812300 | 0.23648800  |
| C | -2.76849900 | -1.52194000 | -1.63669000 |
| H | -2.60669000 | -1.70343700 | -2.70577200 |
| C | -1.53614900 | -2.29687600 | 0.05653500  |
| N | -1.45460600 | -1.51977700 | -0.96154100 |
| C | 5.23454500  | -2.94819700 | -0.52794300 |
| C | 5.29757600  | -2.87163100 | -1.91620900 |
| C | 4.45217800  | -2.01456500 | -2.62026100 |
| C | 3.52631900  | -1.22348200 | -1.94642900 |
| C | 3.45969600  | -1.31204700 | -0.56003500 |
| C | 4.30797800  | -2.16340100 | 0.14791900  |
| H | 5.90139000  | -3.61407400 | 0.01942900  |
| H | 6.01612400  | -3.48433600 | -2.45795600 |

|    |             |             |             |
|----|-------------|-------------|-------------|
| H  | 4.51669400  | -1.96094700 | -3.70527900 |
| H  | 2.87474200  | -0.54272400 | -2.49516000 |
| C  | 4.08352200  | -2.04854600 | 1.63146300  |
| H  | 3.99269900  | -3.01430700 | 2.14638200  |
| H  | 4.90719100  | -1.50835100 | 2.11989900  |
| C  | -3.24340000 | 1.03354400  | -1.70143300 |
| C  | -3.56435700 | -0.27498800 | -1.36364800 |
| C  | -4.73223000 | -0.57624800 | -0.66246900 |
| C  | -5.60506200 | 0.43864500  | -0.29025100 |
| C  | -5.28737800 | 1.75367600  | -0.62550900 |
| C  | -4.11527100 | 2.04987800  | -1.32095400 |
| H  | -2.32700500 | 1.26715800  | -2.24363800 |
| H  | -6.52222700 | 0.21242300  | 0.25341900  |
| H  | -5.95875000 | 2.56000000  | -0.33515200 |
| H  | -3.86290300 | 3.08170600  | -1.55215300 |
| C  | -4.87836400 | -2.05723700 | -0.44378100 |
| H  | -5.07984000 | -2.33499800 | 0.59990200  |
| H  | -3.63868400 | -3.57238700 | -1.46750900 |
| H  | -5.69981800 | -2.47535500 | -1.04316800 |
| H  | 2.75972100  | -0.52981700 | 2.58162400  |
| C  | -0.50358800 | -0.41733300 | -3.40726300 |
| N  | -0.95315900 | -0.49027700 | -4.48321700 |
| Cu | 0.11212800  | -0.40943800 | -1.56578100 |
| N  | 0.64565700  | 2.62442100  | 1.11491500  |
| C  | -0.68430900 | 2.45159300  | 0.77477800  |
| C  | 0.96471000  | 1.79689200  | 2.16643000  |
| O  | 2.05982700  | 1.63825100  | 2.69119300  |
| O  | -1.25285100 | 3.00939500  | -0.15089700 |
| C  | -0.27434200 | 1.04503800  | 2.56082400  |
| C  | -1.28479000 | 1.43864300  | 1.69757800  |
| C  | -2.56078100 | 0.91378100  | 1.78285100  |
| C  | -2.79600700 | -0.03584800 | 2.78161500  |
| C  | -1.78394600 | -0.41679900 | 3.66539800  |

|    |             |             |             |
|----|-------------|-------------|-------------|
| C  | -0.49585300 | 0.11905600  | 3.56281100  |
| H  | -3.34866500 | 1.24164900  | 1.10622000  |
| H  | -3.79127900 | -0.46927600 | 2.88383900  |
| H  | -2.00644900 | -1.13893900 | 4.45103900  |
| H  | 0.30152500  | -0.16397100 | 4.25013600  |
| Si | 1.76866900  | 3.95965000  | -0.14868600 |
| C  | 3.47550900  | 3.57801600  | 0.53354100  |
| H  | 4.00163800  | 4.53412100  | 0.66492900  |
| H  | 3.44222100  | 3.05553200  | 1.49526200  |
| H  | 4.06198300  | 2.98073400  | -0.17839200 |
| C  | 2.08400200  | 4.89953700  | -1.78639800 |
| H  | 2.55586500  | 5.87363200  | -1.58964700 |
| H  | 2.73564300  | 4.33481500  | -2.46921600 |
| H  | 1.14354500  | 5.09692800  | -2.32103500 |
| C  | 0.88009300  | 5.32731800  | 0.81590200  |
| H  | -0.18637600 | 5.35853400  | 0.56062500  |
| H  | 0.96400600  | 5.16708000  | 1.89799700  |
| H  | 1.31483700  | 6.30362100  | 0.56006300  |
| C  | 1.40447800  | 2.28464900  | -1.24550900 |
| N  | 1.20358100  | 1.24483600  | -1.73854300 |

## 8

|   |             |             |             |
|---|-------------|-------------|-------------|
| C | 3.04545000  | 1.36258000  | -1.71515500 |
| O | 2.09904900  | 2.26473900  | -1.07156400 |
| C | 2.53146300  | -0.03331800 | -1.30103300 |
| H | 2.38853600  | -0.74181400 | -2.12497200 |
| C | 1.10810000  | 1.51492200  | -0.57748000 |
| N | 1.21745000  | 0.24544400  | -0.69165400 |
| C | 0.00085400  | 2.26480200  | 0.03774500  |
| C | 0.35530700  | 3.58944600  | 0.71650000  |
| C | -0.33963200 | 3.62229000  | -0.57909700 |
| H | 1.41494800  | 3.82750100  | 0.74765600  |
| H | -0.20983100 | 3.81613700  | 1.61654600  |

|   |             |             |             |
|---|-------------|-------------|-------------|
| H | 0.22882600  | 3.88287600  | -1.46768100 |
| H | -1.39616900 | 3.87431500  | -0.59872200 |
| C | -3.07500600 | 1.32235700  | 1.71524300  |
| O | -2.11525400 | 2.23664700  | 1.10959800  |
| C | -2.55346200 | -0.06387500 | 1.28223900  |
| H | -2.43169800 | -0.79064400 | 2.09435500  |
| C | -1.11386600 | 1.49969900  | 0.61888000  |
| N | -1.22535300 | 0.22707000  | 0.70796000  |
| C | 5.58359200  | 0.18766300  | 0.78684500  |
| C | 5.53165900  | -0.95952500 | 1.57324200  |
| C | 4.49063700  | -1.87633600 | 1.42722400  |
| C | 3.47948900  | -1.65787500 | 0.49688200  |
| C | 3.52987100  | -0.50271400 | -0.27576500 |
| C | 4.57328100  | 0.41156900  | -0.14110600 |
| H | 6.40380500  | 0.89685700  | 0.89698200  |
| H | 6.31481300  | -1.14571500 | 2.30626800  |
| H | 4.46849700  | -2.77296000 | 2.04345100  |
| H | 2.67302700  | -2.37864000 | 0.36387500  |
| C | 4.44073900  | 1.54349900  | -1.12335300 |
| H | 4.54660200  | 2.54039500  | -0.67466500 |
| H | 5.19806300  | 1.47562000  | -1.91784800 |
| C | -3.45478700 | -1.64193500 | -0.57974100 |
| C | -3.52636300 | -0.50805800 | 0.22205000  |
| C | -4.56700100 | 0.40898100  | 0.08543300  |
| C | -5.55394100 | 0.20842600  | -0.87253200 |
| C | -5.48092000 | -0.91779000 | -1.68704600 |
| C | -4.44207400 | -1.83695700 | -1.54024700 |
| H | -2.65041400 | -2.36658700 | -0.45187300 |
| H | -6.37196900 | 0.91976400  | -0.98468600 |
| H | -6.24542800 | -1.08534700 | -2.44381500 |
| H | -4.40237700 | -2.71630800 | -2.17989800 |
| C | -4.45777100 | 1.51610800  | 1.09850700  |
| H | -4.55653100 | 2.52379400  | 0.67302000  |

|    |             |             |             |
|----|-------------|-------------|-------------|
| H  | -3.03778500 | 1.51197800  | 2.79310400  |
| H  | -5.23121400 | 1.42673500  | 1.87515000  |
| H  | 2.98666400  | 1.57477900  | -2.78791200 |
| C  | 1.14840800  | -3.19594400 | -2.10551200 |
| N  | 0.68920700  | -2.50375700 | -1.26480900 |
| Cu | 0.00373200  | -1.24338400 | 0.01636800  |
| C  | -0.67563400 | -2.52901900 | 1.31734900  |
| N  | -1.18691700 | -3.19728000 | 2.12883200  |

#### TS4

|   |             |             |             |
|---|-------------|-------------|-------------|
| C | -3.01204300 | 1.23749900  | 1.78722500  |
| O | -2.08771300 | 2.14142800  | 1.11561600  |
| C | -2.56906500 | -0.14579800 | 1.26992600  |
| H | -2.43227200 | -0.90762800 | 2.04546800  |
| C | -1.12800900 | 1.39238100  | 0.56394100  |
| N | -1.26113400 | 0.12039000  | 0.63966900  |
| C | -0.03849800 | 2.15077900  | -0.07183300 |
| C | -0.41931500 | 3.47645700  | -0.73430400 |
| C | 0.31048000  | 3.50827300  | 0.54177100  |
| H | -1.48071200 | 3.70879300  | -0.73541900 |
| H | 0.11974600  | 3.70859500  | -1.64885000 |
| H | -0.23436200 | 3.76066600  | 1.44721200  |
| H | 1.36616400  | 3.76469400  | 0.53378800  |
| C | 2.99052200  | 1.22621600  | -1.84042000 |
| O | 2.04003400  | 2.14200800  | -1.21839200 |
| C | 2.55072800  | -0.14237500 | -1.28510000 |
| H | 2.46734600  | -0.94171600 | -2.03070200 |
| C | 1.07203000  | 1.39802000  | -0.67356100 |
| N | 1.21679800  | 0.12689500  | -0.71746500 |
| C | -5.68595900 | 0.33569100  | -0.67274300 |
| C | -5.69590000 | -0.73672400 | -1.55943900 |
| C | -4.67749900 | -1.68986500 | -1.53492900 |
| C | -3.62634500 | -1.58330100 | -0.62882500 |

|          |             |             |             |
|----------|-------------|-------------|-------------|
| C        | -3.61572700 | -0.50167900 | 0.24539200  |
| C        | -4.63703300 | 0.44729700  | 0.23166200  |
| H        | -6.48712700 | 1.07439100  | -0.68842100 |
| H        | -6.50909600 | -0.83553000 | -2.27666100 |
| H        | -4.70488900 | -2.52774600 | -2.22895200 |
| H        | -2.83783900 | -2.33556700 | -0.58422200 |
| C        | -4.43537100 | 1.48441400  | 1.30222100  |
| H        | -4.55717500 | 2.51902600  | 0.95459300  |
| H        | -5.14296300 | 1.34652200  | 2.13283700  |
| C        | 3.53221400  | -1.45660200 | 0.73763400  |
| C        | 3.55753100  | -0.43247100 | -0.20216100 |
| C        | 4.57406300  | 0.52160300  | -0.20486400 |
| C        | 5.58976400  | 0.46550300  | 0.74139100  |
| C        | 5.56831900  | -0.55430700 | 1.68814200  |
| C        | 4.54928100  | -1.50689900 | 1.68621900  |
| H        | 2.73585600  | -2.20094600 | 0.73427300  |
| H        | 6.38779600  | 1.20773700  | 0.74512100  |
| H        | 6.35488100  | -0.60899000 | 2.43897300  |
| H        | 4.54524400  | -2.29727100 | 2.43401400  |
| C        | 4.39993700  | 1.50254300  | -1.33223700 |
| H        | 4.51198100  | 2.55366700  | -1.03442900 |
| H        | 2.86984600  | 1.34791200  | -2.92243800 |
| H        | 5.12731900  | 1.32433100  | -2.13782300 |
| H        | -2.86936500 | 1.39613900  | 2.86160800  |
| C        | -1.03825700 | -2.92786100 | 1.27325400  |
| N        | -0.13430600 | -2.45254900 | 1.88023500  |
| Cu       | -0.01510800 | -1.34360500 | 0.00554500  |
| C        | 0.78010100  | -2.67948100 | -1.13718600 |
| N        | 1.35199800  | -3.37986400 | -1.87752800 |
| <b>9</b> |             |             |             |
| C        | 3.06574500  | 1.35213700  | -1.70994400 |
| O        | 2.10889000  | 2.25757900  | -1.08809500 |

|   |             |             |             |
|---|-------------|-------------|-------------|
| C | 2.54953400  | -0.04051700 | -1.28886100 |
| H | 2.41825800  | -0.75674100 | -2.10916400 |
| C | 1.11402600  | 1.51115000  | -0.59538800 |
| N | 1.22868400  | 0.24045400  | -0.69502100 |
| C | 0.00016400  | 2.26764800  | 0.00009200  |
| C | 0.34588300  | 3.60930200  | 0.64872500  |
| C | -0.34579100 | 3.60905000  | -0.64908900 |
| H | 1.40386500  | 3.85463400  | 0.67670100  |
| H | -0.22312000 | 3.85343800  | 1.54165100  |
| H | 0.22318500  | 3.85292400  | -1.54210600 |
| H | -1.40382200 | 3.85417400  | -0.67715700 |
| C | -3.06557000 | 1.35214500  | 1.70995300  |
| O | -2.10806100 | 2.25767700  | 1.08926400  |
| C | -2.54952700 | -0.04050400 | 1.28853400  |
| H | -2.41782900 | -0.75674600 | 2.10875400  |
| C | -1.11372000 | 1.51119400  | 0.59559500  |
| N | -1.22894700 | 0.24047000  | 0.69410300  |
| C | 5.57537000  | 0.20364000  | 0.83395800  |
| C | 5.51529700  | -0.93665500 | 1.62968900  |
| C | 4.47739700  | -1.85635700 | 1.47927600  |
| C | 3.47806300  | -1.64722700 | 0.53434600  |
| C | 3.53648900  | -0.49929200 | -0.24814900 |
| C | 4.57640700  | 0.41795900  | -0.10849800 |
| H | 6.39298800  | 0.91510900  | 0.94837500  |
| H | 6.28943800  | -1.11515200 | 2.37407000  |
| H | 4.44832000  | -2.74714300 | 2.10353000  |
| H | 2.67442200  | -2.37168900 | 0.40155700  |
| C | 4.45303900  | 1.54160300  | -1.10151200 |
| H | 4.55033100  | 2.54220600  | -0.65925100 |
| H | 5.22078100  | 1.46970800  | -1.88556500 |
| C | -3.47879400 | -1.64751500 | -0.53393500 |
| C | -3.53680100 | -0.49930400 | 0.24818500  |
| C | -4.57640200 | 0.41825500  | 0.10832000  |

|    |             |             |             |
|----|-------------|-------------|-------------|
| C  | -5.57553000 | 0.20393300  | -0.83396700 |
| C  | -5.51591000 | -0.93665800 | -1.62930700 |
| C  | -4.47828500 | -1.85664400 | -1.47869800 |
| H  | -2.67533700 | -2.37216600 | -0.40101900 |
| H  | -6.39292800 | 0.91562900  | -0.94854800 |
| H  | -6.29018900 | -1.11516300 | -2.37354300 |
| H  | -4.44956100 | -2.74764700 | -2.10265900 |
| C  | -4.45252800 | 1.54229000  | 1.10083700  |
| H  | -4.54882400 | 2.54271800  | 0.65795300  |
| H  | -3.02162900 | 1.55273600  | 2.78560200  |
| H  | -5.22068200 | 1.47150000  | 1.88458000  |
| H  | 3.02115900  | 1.55330900  | -2.78546800 |
| C  | -0.65593400 | -2.52980300 | 1.32018000  |
| N  | -1.16063800 | -3.19368700 | 2.13975500  |
| Cu | -0.00009200 | -1.25128500 | -0.00024600 |
| C  | 0.65621800  | -2.53012100 | -1.32007000 |
| N  | 1.16149800  | -3.19418900 | -2.13914500 |

**10a**

|   |             |             |             |
|---|-------------|-------------|-------------|
| C | 3.07712500  | -1.14505400 | 0.47918800  |
| O | 2.31208100  | -0.79254800 | 1.66289900  |
| C | 1.97865900  | -1.59208000 | -0.51166800 |
| H | 2.06820200  | -1.15156100 | -1.51464800 |
| C | 1.01707000  | -0.76662600 | 1.28455100  |
| N | 0.72759800  | -1.13455800 | 0.10322600  |
| C | 0.07342300  | -0.31513200 | 2.32671200  |
| C | 0.43553100  | -0.66723300 | 3.76953800  |
| C | 0.57392200  | 0.72917500  | 3.32320700  |
| H | 1.33512000  | -1.26584600 | 3.88133600  |
| H | -0.39491500 | -0.93088800 | 4.41762800  |
| H | 1.56975700  | 1.11625100  | 3.12265300  |
| H | -0.16299500 | 1.45774100  | 3.65575000  |
| C | -3.48964700 | 0.15342100  | 2.53320200  |



|   |             |             |             |
|---|-------------|-------------|-------------|
| O | -2.16507400 | -0.04971100 | 3.06755000  |
| C | -3.41059100 | -0.46183600 | 1.13122600  |
| H | -3.73332300 | -1.50883000 | 1.04242900  |
| C | -1.36490600 | -0.27841400 | 2.00747600  |
| N | -1.95328800 | -0.43043800 | 0.87783900  |
| C | 3.43315800  | -4.87610400 | 0.39185100  |
| C | 2.56891000  | -5.79335800 | -0.19904900 |
| C | 1.46839500  | -5.36133600 | -0.93976200 |
| C | 1.21420800  | -4.00361700 | -1.10435500 |
| C | 2.08102800  | -3.09386100 | -0.51146400 |
| C | 3.17986500  | -3.51875800 | 0.23307200  |
| H | 4.28991400  | -5.21771300 | 0.97298700  |
| H | 2.75114600  | -6.86014000 | -0.07785000 |
| H | 0.79521100  | -6.09045700 | -1.38618000 |
| H | 0.34739200  | -3.66012800 | -1.66770400 |
| C | 3.97181700  | -2.34988900 | 0.75483500  |
| H | 4.21670600  | -2.41972800 | 1.82335900  |
| H | 4.92711500  | -2.23855700 | 0.22035700  |
| C | -4.59736900 | 0.29737400  | -1.04565000 |
| C | -4.16665600 | 0.48990300  | 0.25980800  |
| C | -4.36573200 | 1.69984600  | 0.92564800  |
| C | -4.99316500 | 2.75396100  | 0.27483900  |
| C | -5.41553300 | 2.57448900  | -1.04145100 |
| C | -5.22690200 | 1.35715000  | -1.69505600 |
| H | -4.43908800 | -0.66016600 | -1.54401100 |
| H | -5.15781000 | 3.70449900  | 0.78157800  |
| H | -5.91027000 | 3.39246200  | -1.56233500 |
| H | -5.57550000 | 1.23350200  | -2.71880800 |
| C | -3.80670300 | 1.64558700  | 2.32355400  |
| H | -2.87437500 | 2.22827800  | 2.41022100  |
| H | -4.18710100 | -0.34571900 | 3.21050500  |
| H | -4.49385600 | 2.04184600  | 3.08179900  |
| H | 3.62069700  | -0.23960100 | 0.17834100  |

|    |             |             |             |
|----|-------------|-------------|-------------|
| C  | -0.64955000 | -1.05072000 | -2.70085200 |
| N  | -0.11618100 | -1.26981200 | -3.71739300 |
| Cu | -1.28255100 | -0.87517600 | -0.96143700 |
| C  | -2.07597100 | -2.69803500 | -0.78619000 |
| N  | -2.69500800 | -3.66680200 | -0.56842800 |
| C  | 2.75460900  | 2.53182800  | -0.35931100 |
| C  | 2.55140500  | 1.96249500  | -1.62064700 |
| C  | 1.29754800  | 1.52925100  | -2.02470700 |
| C  | 0.19290200  | 1.63979200  | -1.16675500 |
| C  | 0.39607300  | 2.21989800  | 0.09450500  |
| C  | 1.64937400  | 2.66416700  | 0.48651400  |
| H  | 3.40221100  | 1.85453700  | -2.29566400 |
| H  | 1.17405900  | 1.04857700  | -2.99481900 |
| H  | -0.45573700 | 2.32132900  | 0.77156400  |
| H  | 1.78265000  | 3.11971700  | 1.47015300  |
| C  | 4.10762000  | 3.01365300  | 0.07691400  |
| C  | -1.14528200 | 1.18822800  | -1.54918500 |
| H  | -1.88779500 | 1.41022000  | -0.77221300 |
| C  | 4.27352400  | 4.53935700  | 0.02103100  |
| H  | 3.48310600  | 4.98431500  | 0.65138500  |
| C  | -1.67620700 | 1.54744300  | -2.90913900 |
| H  | -0.96935900 | 1.34779600  | -3.71885400 |
| H  | -2.60517800 | 1.01038500  | -3.13152200 |
| H  | -1.90824400 | 2.62591900  | -2.90650900 |
| H  | 4.88876100  | 2.55569100  | -0.55368700 |
| H  | 4.30323200  | 2.67621700  | 1.10838600  |
| C  | 4.10837400  | 5.06341200  | -1.39786000 |
| H  | 4.86083400  | 4.61193500  | -2.06333700 |
| H  | 3.11778100  | 4.83217900  | -1.80955100 |
| H  | 4.24460300  | 6.15205500  | -1.43568300 |
| C  | 5.62870000  | 4.93550800  | 0.58815200  |
| H  | 5.76074000  | 6.02531000  | 0.58484000  |
| H  | 5.75840900  | 4.58191000  | 1.61996600  |

|   |            |            |             |
|---|------------|------------|-------------|
| H | 6.43979900 | 4.50279100 | -0.01683100 |
|---|------------|------------|-------------|

**TS5a**

|   |             |             |             |
|---|-------------|-------------|-------------|
| C | 3.19122300  | -0.95725300 | 0.31681400  |
| O | 2.47028300  | -0.54996300 | 1.51025700  |
| C | 2.06896700  | -1.53479900 | -0.57396700 |
| H | 2.08182800  | -1.17249400 | -1.61129500 |
| C | 1.15682900  | -0.62555400 | 1.20872400  |
| N | 0.82778700  | -1.09730200 | 0.07461100  |
| C | 0.24840200  | -0.15911500 | 2.27518600  |
| C | 0.70583900  | -0.40996100 | 3.71291100  |
| C | 0.75014300  | 0.96251000  | 3.18097600  |
| H | 1.63896400  | -0.95815200 | 3.80772000  |
| H | -0.07507500 | -0.67368800 | 4.42006300  |
| H | 1.71456800  | 1.38104800  | 2.90259700  |
| H | -0.00155200 | 1.67616000  | 3.51282200  |
| C | -3.32106300 | 0.14613800  | 2.64808500  |
| O | -1.95977000 | 0.06167400  | 3.11976600  |
| C | -3.27730600 | -0.56748600 | 1.29059800  |
| H | -3.56149700 | -1.62919900 | 1.29063200  |
| C | -1.20520900 | -0.21694100 | 2.03722300  |
| N | -1.83834900 | -0.49634800 | 0.95861000  |
| C | 3.74116700  | -4.66226000 | 0.49176900  |
| C | 2.89603800  | -5.66382100 | 0.02245200  |
| C | 1.73559000  | -5.34537200 | -0.68367800 |
| C | 1.40148400  | -4.01868500 | -0.93568500 |
| C | 2.25092200  | -3.02474200 | -0.46541200 |
| C | 3.40850300  | -3.33542400 | 0.24554100  |
| H | 4.64436500  | -4.91548500 | 1.04721200  |
| H | 3.14068600  | -6.70770800 | 0.21315100  |
| H | 1.07880100  | -6.13924800 | -1.03365300 |
| H | 0.48792100  | -3.76202600 | -1.47120700 |
| C | 4.16247400  | -2.09129700 | 0.63237300  |

|    |             |             |             |
|----|-------------|-------------|-------------|
| H  | 4.46603800  | -2.06504100 | 1.68770300  |
| H  | 5.08131700  | -1.97473200 | 0.03841200  |
| C  | -4.55930900 | -0.01113300 | -0.89179500 |
| C  | -4.10469600 | 0.28912200  | 0.38558800  |
| C  | -4.32844900 | 1.53600300  | 0.96930800  |
| C  | -5.00614400 | 2.52018100  | 0.26071800  |
| C  | -5.45221600 | 2.23346200  | -1.02845400 |
| C  | -5.23842600 | 0.97855200  | -1.59879500 |
| H  | -4.37572800 | -0.99628600 | -1.32362000 |
| H  | -5.19098400 | 3.49913200  | 0.70234600  |
| H  | -5.98529700 | 2.99623100  | -1.59349300 |
| H  | -5.60636700 | 0.77093500  | -2.60201700 |
| C  | -3.74058100 | 1.59933800  | 2.35527500  |
| H  | -2.85049900 | 2.24858600  | 2.39510100  |
| H  | -3.94814100 | -0.34125700 | 3.39878100  |
| H  | -4.44308100 | 1.99106400  | 3.10207300  |
| H  | 3.66998100  | -0.05258000 | -0.08091500 |
| C  | -0.62380200 | -1.21274700 | -2.63838800 |
| N  | -0.07299200 | -1.47861500 | -3.63517700 |
| Cu | -1.22726900 | -1.08797500 | -0.88832200 |
| C  | -2.00807100 | -2.89596400 | -0.60407800 |
| N  | -2.63556200 | -3.84184900 | -0.31901600 |
| C  | 2.40585900  | 2.70690300  | -0.45076600 |
| C  | 2.34386800  | 2.04683500  | -1.68212300 |
| C  | 1.16399900  | 1.47720900  | -2.13764900 |
| C  | 0.00038600  | 1.53326300  | -1.35837000 |
| C  | 0.05594400  | 2.21624400  | -0.13470200 |
| C  | 1.23266800  | 2.80313000  | 0.30266600  |
| H  | 3.24814600  | 1.97314900  | -2.28913100 |
| H  | 1.14898500  | 0.92810400  | -3.07895800 |
| H  | -0.84818400 | 2.28055800  | 0.47503900  |
| H  | 1.25309000  | 3.33473400  | 1.25628800  |
| C  | 3.68378400  | 3.31014400  | 0.05512600  |

|   |             |            |             |
|---|-------------|------------|-------------|
| C | -1.25793800 | 0.91596500 | -1.78120700 |
| H | -2.05677400 | 1.05691400 | -1.04166400 |
| C | 3.73704100  | 4.84093100 | -0.04764200 |
| H | 2.87626200  | 5.24451300 | 0.51464300  |
| C | -1.77975900 | 1.18473400 | -3.16471600 |
| H | -1.03027900 | 1.04600100 | -3.94837100 |
| H | -2.63961600 | 0.54706300 | -3.39842200 |
| H | -2.12204300 | 2.23278900 | -3.18905100 |
| H | 4.53967800  | 2.89414400 | -0.50352300 |
| H | 3.83188100  | 3.01985300 | 1.10938400  |
| C | 3.62429200  | 5.30128300 | -1.49365700 |
| H | 4.44891800  | 4.88567700 | -2.09381600 |
| H | 2.68172900  | 4.98053800 | -1.95514200 |
| H | 3.68138300  | 6.39513400 | -1.56633400 |
| C | 5.01880600  | 5.36057300 | 0.58626600  |
| H | 5.06703100  | 6.45666600 | 0.55039700  |
| H | 5.10890500  | 5.05186700 | 1.63652600  |
| H | 5.89759800  | 4.97362700 | 0.04859700  |

**R-pro**

|   |             |             |             |
|---|-------------|-------------|-------------|
| C | 3.95135200  | -0.58606600 | -0.16337100 |
| N | 4.62595900  | -1.52866200 | -0.22563500 |
| C | -1.11116600 | -0.21790000 | -0.64048800 |
| C | -0.27322800 | -1.18427800 | -0.08398600 |
| C | 1.08473500  | -0.94464700 | 0.09275400  |
| C | 1.63899700  | 0.27441400  | -0.28981600 |
| C | 0.80854800  | 1.24696300  | -0.84564300 |
| C | -0.54700300 | 1.00317000  | -1.01735000 |
| H | -0.69475000 | -2.14528800 | 0.21406200  |
| H | 1.72334200  | -1.71963500 | 0.51834500  |
| H | 1.23268000  | 2.20491800  | -1.15189000 |
| H | -1.18295100 | 1.76911200  | -1.46422700 |
| C | -2.58475100 | -0.45624400 | -0.80677600 |

|   |             |             |             |
|---|-------------|-------------|-------------|
| C | 3.09908400  | 0.59880900  | -0.04447300 |
| H | 3.43283400  | 1.31332500  | -0.81364200 |
| C | -3.45039800 | 0.26163400  | 0.23814400  |
| H | -3.22159200 | 1.34059000  | 0.17791000  |
| C | 3.29569100  | 1.23955300  | 1.33672600  |
| H | 2.68739200  | 2.14883400  | 1.40809100  |
| H | 2.97009100  | 0.54778600  | 2.12313700  |
| H | 4.34585300  | 1.49926000  | 1.51285800  |
| H | -2.79805500 | -1.53698200 | -0.75221000 |
| H | -2.90101600 | -0.12805000 | -1.80999900 |
| C | -4.92454400 | 0.05922800  | -0.07993100 |
| H | -5.18431500 | -1.00926800 | -0.03368400 |
| H | -5.56572900 | 0.58583600  | 0.63905800  |
| H | -5.17734700 | 0.41930800  | -1.08629900 |
| C | -3.13353600 | -0.21782400 | 1.64714200  |
| H | -3.31805900 | -1.30023300 | 1.73386800  |
| H | -2.08572500 | -0.03570000 | 1.91752000  |
| H | -3.76706000 | 0.28594300  | 2.38895500  |

**10b**

|   |             |             |            |
|---|-------------|-------------|------------|
| C | -4.33902200 | -1.02075800 | 1.95279900 |
| O | -3.63489100 | 0.17687600  | 2.38576400 |
| C | -3.75169400 | -1.26904400 | 0.54252800 |
| H | -3.41738300 | -2.30103700 | 0.36188700 |
| C | -2.66156700 | 0.39643100  | 1.47818200 |
| N | -2.59930700 | -0.36948500 | 0.46478600 |
| C | -1.75511900 | 1.52788700  | 1.77166000 |
| C | -2.26632000 | 2.59879800  | 2.71792800 |
| C | -1.23217400 | 1.66561100  | 3.20407200 |
| H | -3.28560100 | 2.46013800  | 3.06612400 |
| H | -1.97899000 | 3.61924800  | 2.48434400 |
| H | -1.51583100 | 0.87178600  | 3.89155000 |
| H | -0.20781400 | 2.02434200  | 3.29871300 |

|   |             |             |             |
|---|-------------|-------------|-------------|
| C | 0.48436100  | 3.43462000  | -0.33869400 |
| O | -0.49356600 | 3.24915600  | 0.70999300  |
| C | 0.40390000  | 2.13159200  | -1.15176700 |
| H | -0.19956100 | 2.18793400  | -2.06813300 |
| C | -0.82781700 | 1.94805900  | 0.69628400  |
| N | -0.31099100 | 1.22503600  | -0.22730300 |
| C | -7.12432300 | -0.04570000 | -0.36801600 |
| C | -7.06045600 | 0.08803200  | -1.75213200 |
| C | -5.89388900 | -0.23151500 | -2.44822400 |
| C | -4.77096200 | -0.69688700 | -1.77146300 |
| C | -4.84699200 | -0.83423900 | -0.39110500 |
| C | -6.00384700 | -0.50787600 | 0.31259300  |
| H | -8.03588500 | 0.21236300  | 0.17105400  |
| H | -7.92958600 | 0.45240700  | -2.29769200 |
| H | -5.85684300 | -0.10914400 | -3.52887100 |
| H | -3.84667700 | -0.92442400 | -2.30391400 |
| C | -5.83252500 | -0.74570500 | 1.78935900  |
| H | -6.14322900 | 0.10271700  | 2.41386900  |
| H | -6.41417200 | -1.61516100 | 2.12968900  |
| C | 2.31884900  | 0.82026700  | -2.31002500 |
| C | 1.83318600  | 1.77639200  | -1.42762100 |
| C | 2.69237200  | 2.60318700  | -0.70334100 |
| C | 4.06707000  | 2.49527200  | -0.86927300 |
| C | 4.56209300  | 1.53916300  | -1.75415200 |
| C | 3.69787900  | 0.70368800  | -2.46206800 |
| H | 1.62872800  | 0.19520500  | -2.87817600 |
| H | 4.74882800  | 3.14712200  | -0.32225600 |
| H | 5.63901800  | 1.44767300  | -1.89927600 |
| H | 4.10398200  | -0.03762700 | -3.14851800 |
| C | 1.91981900  | 3.53026500  | 0.19787700  |
| H | 1.93892200  | 3.18182200  | 1.24445400  |
| H | 0.18049500  | 4.32537000  | -0.89525500 |
| H | 2.30176000  | 4.55896800  | 0.20299800  |

|    |             |             |             |
|----|-------------|-------------|-------------|
| H  | -4.11099700 | -1.79866400 | 2.69143600  |
| C  | -0.73959000 | -2.53532600 | -1.13985200 |
| N  | -0.85878700 | -3.65979200 | -1.43355700 |
| Cu | -0.67510600 | -0.71165500 | -0.73493100 |
| C  | -1.21054800 | -0.13424300 | -2.55348900 |
| N  | -1.46890500 | 0.32411700  | -3.59839200 |
| C  | 4.44554200  | -1.47870000 | 0.24887700  |
| C  | 3.64523800  | -2.55734400 | -0.14622600 |
| C  | 2.27847700  | -2.56690700 | 0.07212600  |
| C  | 1.65236300  | -1.48275800 | 0.70668400  |
| C  | 2.45386800  | -0.40350900 | 1.10201900  |
| C  | 3.82364400  | -0.40675500 | 0.89155800  |
| H  | 4.11165200  | -3.40265100 | -0.65381900 |
| H  | 1.67495500  | -3.40085300 | -0.28433500 |
| H  | 1.98515300  | 0.44956400  | 1.59824600  |
| H  | 4.41022700  | 0.45127500  | 1.21649300  |
| C  | 5.90676900  | -1.46729500 | -0.11142500 |
| C  | 0.21854800  | -1.45890300 | 1.01393700  |
| C  | 6.84483000  | -0.66775700 | 0.79109400  |
| H  | 6.48211500  | 0.37436600  | 0.83886400  |
| C  | -0.39953000 | -2.65808000 | 1.67701100  |
| H  | -0.19684900 | -3.59711200 | 1.15593500  |
| H  | 0.01219500  | -2.73417200 | 2.69733500  |
| H  | -1.48770900 | -2.54878100 | 1.76441500  |
| H  | -0.04842300 | -0.54238200 | 1.55179300  |
| H  | 6.27331800  | -2.50728000 | -0.16182600 |
| H  | 5.99843300  | -1.07922700 | -1.14223500 |
| C  | 8.24155200  | -0.64181300 | 0.18590700  |
| H  | 8.64258500  | -1.66256900 | 0.09520700  |
| H  | 8.24027000  | -0.19553600 | -0.81839800 |
| H  | 8.93833500  | -0.06735200 | 0.81022500  |
| C  | 6.88252300  | -1.24044500 | 2.20133300  |
| H  | 7.54859400  | -0.65787100 | 2.85144800  |



|   |            |             |            |
|---|------------|-------------|------------|
| H | 5.88804900 | -1.26218800 | 2.66503200 |
| H | 7.26055000 | -2.27390700 | 2.18007200 |

**TS5b**

|   |             |             |             |
|---|-------------|-------------|-------------|
| C | 4.16393000  | -1.61174500 | -1.75056300 |
| O | 3.56160400  | -0.45024800 | -2.38639300 |
| C | 3.61340200  | -1.52632900 | -0.30841600 |
| H | 3.21919700  | -2.47364500 | 0.08695200  |
| C | 2.62966200  | 0.01573500  | -1.52984700 |
| N | 2.52785800  | -0.54660000 | -0.39208000 |
| C | 1.82099000  | 1.15175000  | -2.02376000 |
| C | 2.40148500  | 1.96974900  | -3.16315100 |
| C | 1.27357700  | 1.06336300  | -3.45107800 |
| H | 3.39387300  | 1.67314700  | -3.48932200 |
| H | 2.21340500  | 3.03821700  | -3.12448300 |
| H | 1.46614300  | 0.13159900  | -3.97813200 |
| H | 0.28460000  | 1.49358700  | -3.60333600 |
| C | -0.19981000 | 3.61849200  | -0.30773700 |
| O | 0.72650600  | 3.15115600  | -1.31593100 |
| C | -0.19262400 | 2.49678700  | 0.74720700  |
| H | 0.42553000  | 2.69017600  | 1.63511800  |
| C | 0.96766800  | 1.85700300  | -1.03962600 |
| N | 0.43881900  | 1.37687300  | 0.02190700  |
| C | 7.10254600  | -0.42466200 | 0.25246400  |
| C | 7.09980400  | 0.01311400  | 1.57373600  |
| C | 5.93702000  | -0.04462200 | 2.34323400  |
| C | 4.75639000  | -0.54858700 | 1.80636500  |
| C | 4.77144500  | -0.99206000 | 0.48976000  |
| C | 5.92499100  | -0.92673700 | -0.28883300 |
| H | 8.01103900  | -0.36837900 | -0.34716300 |
| H | 8.01415200  | 0.41252800  | 2.00985700  |
| H | 5.94829600  | 0.31494300  | 3.37023500  |
| H | 3.83679200  | -0.57017200 | 2.39270900  |

|    |             |             |             |
|----|-------------|-------------|-------------|
| C  | 5.68085300  | -1.46159100 | -1.67475300 |
| H  | 6.05009400  | -0.80633300 | -2.47507700 |
| H  | 6.16179200  | -2.43993200 | -1.82253700 |
| C  | -2.17059800 | 1.53696200  | 2.12417100  |
| C  | -1.63767600 | 2.29174200  | 1.08686300  |
| C  | -2.45392300 | 3.01847400  | 0.22065200  |
| C  | -3.83153300 | 3.01965400  | 0.39873900  |
| C  | -4.37359600 | 2.26588300  | 1.43752400  |
| C  | -3.55313900 | 1.52334400  | 2.28679600  |
| H  | -1.51232000 | 0.98702100  | 2.79799000  |
| H  | -4.47853600 | 3.60096800  | -0.25863000 |
| H  | -5.45201200 | 2.25969800  | 1.59191300  |
| H  | -3.99655800 | 0.93738900  | 3.09015000  |
| C  | -1.63933700 | 3.72103900  | -0.83345300 |
| H  | -1.70711900 | 3.20411900  | -1.80543600 |
| H  | 0.18896300  | 4.57435300  | 0.05375400  |
| H  | -1.95098900 | 4.75863300  | -1.00900600 |
| H  | 3.83215900  | -2.48733900 | -2.32206700 |
| C  | 0.43460500  | -2.20997100 | 1.49233800  |
| N  | 0.42363900  | -3.25187000 | 2.02363100  |
| Cu | 0.69857200  | -0.45139300 | 0.95653600  |
| C  | 1.27558600  | 0.38541400  | 2.63926900  |
| N  | 1.57574900  | 1.00901000  | 3.58267800  |
| C  | -4.58324500 | -1.06263900 | 0.01553900  |
| C  | -3.92632900 | -2.10468700 | 0.67925500  |
| C  | -2.56127700 | -2.29752100 | 0.54487900  |
| C  | -1.80061300 | -1.43714900 | -0.25850900 |
| C  | -2.45478900 | -0.38422000 | -0.90872800 |
| C  | -3.82596900 | -0.21227100 | -0.78887600 |
| H  | -4.50167700 | -2.76931400 | 1.32571800  |
| H  | -2.06212500 | -3.09468800 | 1.09442700  |
| H  | -1.87155000 | 0.30208700  | -1.52697300 |
| H  | -4.31797900 | 0.61077000  | -1.30884400 |

|   |             |             |             |
|---|-------------|-------------|-------------|
| C | -6.06454000 | -0.87870800 | 0.17002200  |
| C | -0.36238700 | -1.63890200 | -0.51028100 |
| C | -6.90335600 | -1.91958500 | -0.58405700 |
| H | -6.60002600 | -2.91872700 | -0.22494000 |
| C | 0.08147100  | -2.97249400 | -1.05214900 |
| H | -0.26671300 | -3.81774900 | -0.45302300 |
| H | -0.33112400 | -3.07116000 | -2.06920500 |
| H | 1.17448700  | -3.03098300 | -1.12415700 |
| H | 0.02654600  | -0.84214200 | -1.15426300 |
| H | -6.32878900 | -0.91893000 | 1.23997700  |
| H | -6.35436900 | 0.12564500  | -0.18430800 |
| C | -6.64952200 | -1.85120400 | -2.08293400 |
| H | -5.59673700 | -2.03973000 | -2.32896300 |
| H | -7.26088600 | -2.58600600 | -2.62301100 |
| H | -6.91033800 | -0.85342300 | -2.47012200 |
| C | -8.38025800 | -1.72077400 | -0.27755900 |
| H | -8.99977800 | -2.47036100 | -0.78710300 |
| H | -8.58506500 | -1.78804000 | 0.79936300  |
| H | -8.71370300 | -0.72887500 | -0.61898200 |

**S-pro**

|   |             |             |             |
|---|-------------|-------------|-------------|
| C | 3.55907600  | 1.11046000  | 0.35319700  |
| N | 3.86278400  | 2.10824700  | 0.86304500  |
| C | -1.14179700 | -0.39516400 | -0.62749700 |
| C | -0.42622600 | 0.69169300  | -1.13944000 |
| C | 0.95228900  | 0.75947000  | -1.01849900 |
| C | 1.66530100  | -0.25895700 | -0.38028100 |
| C | 0.95978000  | -1.34199100 | 0.13372900  |
| C | -0.42580700 | -1.40591500 | 0.00853600  |
| H | -0.96503000 | 1.49480300  | -1.64472200 |
| H | 1.49099700  | 1.61894600  | -1.42042800 |
| H | 1.48249400  | -2.15228000 | 0.63867900  |
| H | -0.96379500 | -2.26161900 | 0.41916600  |

|   |             |             |             |
|---|-------------|-------------|-------------|
| C | -2.63894900 | -0.43683600 | -0.73481000 |
| C | 3.18144800  | -0.15219400 | -0.29302700 |
| C | -3.35675200 | 0.49882000  | 0.24813000  |
| H | -2.98358700 | 1.52274700  | 0.06909500  |
| C | 3.88055700  | -1.31524700 | 0.40773400  |
| H | 3.54740400  | -1.40735400 | 1.44829700  |
| H | 3.66960500  | -2.25669800 | -0.11227900 |
| H | 4.96469100  | -1.16122500 | 0.41296400  |
| H | 3.57200000  | -0.09310000 | -1.32358800 |
| H | -2.94313900 | -0.16950300 | -1.75968600 |
| H | -2.99882500 | -1.46508900 | -0.56180100 |
| C | -3.05590900 | 0.12474200  | 1.69204900  |
| H | -3.38265500 | -0.90723200 | 1.89628100  |
| H | -1.98396500 | 0.18692900  | 1.91807600  |
| H | -3.58724100 | 0.78416600  | 2.39069000  |
| C | -4.85560600 | 0.47510900  | -0.01300900 |
| H | -5.39032500 | 1.15797800  | 0.66006800  |
| H | -5.09390200 | 0.76244200  | -1.04601000 |
| H | -5.25864300 | -0.53558300 | 0.15301300  |

**10a1**

|   |            |             |             |
|---|------------|-------------|-------------|
| C | 4.53204900 | 0.01113200  | -1.90467700 |
| O | 4.17565500 | 1.31846700  | -1.38924600 |
| C | 3.60789000 | -0.92793700 | -1.09900100 |
| H | 3.06321900 | -1.65271800 | -1.72175700 |
| C | 3.05419300 | 1.15664500  | -0.65502500 |
| N | 2.64353600 | -0.03285700 | -0.45805400 |
| C | 2.46676700 | 2.40291100  | -0.13029900 |
| C | 3.45538100 | 3.43435100  | 0.40269600  |
| C | 2.76915500 | 3.69892900  | -0.87599100 |
| H | 4.50011000 | 3.13590400  | 0.37657200  |
| H | 3.13899900 | 3.97724100  | 1.28863200  |
| H | 3.32560800 | 3.58992000  | -1.80264100 |

|   |             |             |             |
|---|-------------|-------------|-------------|
| H | 1.96333800  | 4.42824000  | -0.88995500 |
| C | -0.47457600 | 3.12686700  | 1.85517000  |
| O | 0.77367300  | 3.43420600  | 1.18669700  |
| C | -0.89532800 | 1.80759500  | 1.17465200  |
| H | -1.21032100 | 1.02509100  | 1.87997100  |
| C | 1.14139500  | 2.32266900  | 0.51387700  |
| N | 0.30929600  | 1.35740500  | 0.47118100  |
| C | 6.85723900  | -1.67086400 | 0.51423000  |
| C | 6.51274400  | -2.47083600 | 1.59993700  |
| C | 5.18035600  | -2.80409300 | 1.84530100  |
| C | 4.17304100  | -2.34993400 | 1.00019500  |
| C | 4.52491600  | -1.56422200 | -0.09014300 |
| C | 5.85200800  | -1.21378500 | -0.33002200 |
| H | 7.89805100  | -1.40102800 | 0.33543400  |
| H | 7.29010600  | -2.83089200 | 2.27201500  |
| H | 4.92499600  | -3.41213800 | 2.71102800  |
| H | 3.12557400  | -2.57173100 | 1.20898400  |
| C | 5.97479800  | -0.34453300 | -1.55279100 |
| H | 6.57271600  | 0.56230100  | -1.39049400 |
| H | 6.44429200  | -0.88478600 | -2.38806600 |
| C | -2.57894500 | 1.46430600  | -0.77386900 |
| C | -1.98278400 | 2.22602900  | 0.22227100  |
| C | -2.33355000 | 3.56050500  | 0.41750900  |
| C | -3.31460600 | 4.14715600  | -0.37351700 |
| C | -3.93026300 | 3.38258200  | -1.36086900 |
| C | -3.56221700 | 2.05199500  | -1.56306000 |
| H | -2.26689700 | 0.43440700  | -0.94781200 |
| H | -3.59410900 | 5.19074700  | -0.22888600 |
| H | -4.69825500 | 3.83133200  | -1.98907600 |
| H | -4.03691600 | 1.46851100  | -2.35108400 |
| C | -1.53908700 | 4.17395400  | 1.53897600  |
| H | -1.07719600 | 5.13557400  | 1.27781400  |
| H | -0.24467800 | 3.03586200  | 2.92291700  |

|    |             |             |             |
|----|-------------|-------------|-------------|
| H  | -2.16330100 | 4.35610900  | 2.42626300  |
| H  | 4.33068300  | 0.03359700  | -2.98144600 |
| C  | 0.24613300  | -0.79957700 | -1.85061000 |
| N  | 0.09354100  | -0.77455600 | -3.00988500 |
| Cu | 0.60836500  | -0.80925200 | 0.03679600  |
| C  | 0.84984500  | -1.08810400 | 1.91586400  |
| N  | 0.92730200  | -1.19283500 | 3.07817700  |
| C  | -4.54492300 | -1.31702300 | -0.09116600 |
| C  | -3.89982900 | -1.79830000 | -1.23443500 |
| C  | -2.58398500 | -2.23094800 | -1.19050800 |
| C  | -1.87410900 | -2.21897900 | 0.02041400  |
| C  | -2.53006500 | -1.75677300 | 1.17639600  |
| C  | -3.83842900 | -1.31181500 | 1.11753200  |
| H  | -4.44039600 | -1.81125700 | -2.18189400 |
| H  | -2.09051500 | -2.55032300 | -2.10599000 |
| H  | -1.97748900 | -1.73015800 | 2.11716800  |
| H  | -4.32560400 | -0.93710200 | 2.01882000  |
| C  | -5.95841400 | -0.81947400 | -0.14299700 |
| C  | -0.49883600 | -2.68394000 | 0.13805300  |
| H  | -0.23681400 | -2.93724000 | 1.16402300  |
| C  | -6.97504600 | -1.76759700 | 0.50875200  |
| H  | -6.66611800 | -1.92364600 | 1.55737000  |
| C  | 0.13141500  | -3.61031600 | -0.85257800 |
| H  | -0.29435700 | -4.61559800 | -0.69120800 |
| H  | -0.02724900 | -3.32053900 | -1.89397900 |
| H  | 1.21195500  | -3.68673000 | -0.67957700 |
| H  | -6.25798000 | -0.65533900 | -1.19182200 |
| H  | -6.01464800 | 0.16336700  | 0.35295900  |
| C  | -6.99673700 | -3.11855100 | -0.19175100 |
| H  | -7.26392100 | -2.99560600 | -1.25315500 |
| H  | -6.02088800 | -3.61913100 | -0.14984900 |
| H  | -7.73968200 | -3.78796600 | 0.26118300  |
| C  | -8.35736600 | -1.13221400 | 0.49902500  |

|   |             |             |             |
|---|-------------|-------------|-------------|
| H | -9.09876700 | -1.78010200 | 0.98463200  |
| H | -8.36371300 | -0.16311200 | 1.01569900  |
| H | -8.69414600 | -0.96110700 | -0.53465900 |

**TS5a1**

|   |             |             |             |
|---|-------------|-------------|-------------|
| C | 4.32184400  | -0.13772000 | -1.98178200 |
| O | 4.02218800  | 1.19877100  | -1.50085400 |
| C | 3.53032700  | -1.02255100 | -0.99806100 |
| H | 2.94892400  | -1.81332300 | -1.49366900 |
| C | 2.98020600  | 1.07656700  | -0.65248900 |
| N | 2.61158200  | -0.10005200 | -0.32840400 |
| C | 2.41777900  | 2.34976200  | -0.16395100 |
| C | 3.42988600  | 3.41059200  | 0.25349500  |
| C | 2.66919600  | 3.60353600  | -0.99582400 |
| H | 4.47271500  | 3.11203600  | 0.18237200  |
| H | 3.16414300  | 4.00139600  | 1.12552200  |
| H | 3.17003100  | 3.44293500  | -1.94624000 |
| H | 1.86083200  | 4.33007800  | -1.00262900 |
| C | -0.44203300 | 3.18706100  | 1.90010800  |
| O | 0.79156400  | 3.44823400  | 1.18523800  |
| C | -0.90250500 | 1.85406000  | 1.27681900  |
| H | -1.23677400 | 1.10832200  | 2.01240700  |
| C | 1.12628500  | 2.30608800  | 0.54835300  |
| N | 0.28273800  | 1.34917000  | 0.57993400  |
| C | 6.97367600  | -1.56263400 | 0.25222800  |
| C | 6.78848300  | -2.24786200 | 1.44965000  |
| C | 5.50573600  | -2.56215200 | 1.89949800  |
| C | 4.38858400  | -2.20575800 | 1.15060400  |
| C | 4.58109400  | -1.53926300 | -0.05285200 |
| C | 5.85904800  | -1.20464100 | -0.49712700 |
| H | 7.97694100  | -1.30368100 | -0.08616800 |
| H | 7.65318800  | -2.53048900 | 2.04807500  |
| H | 5.37734300  | -3.07911000 | 2.84876300  |

|    |             |             |             |
|----|-------------|-------------|-------------|
| H  | 3.38113800  | -2.40941100 | 1.51578100  |
| C  | 5.80228000  | -0.46213800 | -1.80577400 |
| H  | 6.41091000  | 0.45186700  | -1.82125800 |
| H  | 6.15096500  | -1.08679400 | -2.64140300 |
| C  | -2.58255100 | 1.49325500  | -0.67228300 |
| C  | -1.98092100 | 2.26765700  | 0.31072200  |
| C  | -2.30150400 | 3.61492900  | 0.46622700  |
| C  | -3.26081800 | 4.20251200  | -0.35019200 |
| C  | -3.88256600 | 3.42612100  | -1.32447200 |
| C  | -3.54236500 | 2.08289500  | -1.48840100 |
| H  | -2.29031000 | 0.45311800  | -0.81792700 |
| H  | -3.51638900 | 5.25610100  | -0.23752600 |
| H  | -4.63187600 | 3.87575900  | -1.97419700 |
| H  | -4.01785600 | 1.49191800  | -2.27028100 |
| C  | -1.49591200 | 4.24059200  | 1.57293400  |
| H  | -1.02601600 | 5.19313100  | 1.29375100  |
| H  | -0.18352900 | 3.13106900  | 2.96391400  |
| H  | -2.11271000 | 4.44249100  | 2.46130700  |
| H  | 3.96832900  | -0.18499900 | -3.01803900 |
| C  | 0.22378800  | -0.81871600 | -1.96432100 |
| N  | 0.18169800  | -0.96360000 | -3.12520800 |
| Cu | 0.49922200  | -0.72774500 | -0.02457300 |
| C  | 0.65233300  | -1.29000800 | 1.78010100  |
| N  | 0.92039300  | -1.25952400 | 2.91979400  |
| C  | -4.52404800 | -1.33049400 | -0.08584500 |
| C  | -3.75643600 | -1.84523100 | -1.13299100 |
| C  | -2.44236100 | -2.24726100 | -0.93748300 |
| C  | -1.86488500 | -2.16912300 | 0.33585400  |
| C  | -2.64044600 | -1.67282200 | 1.39522900  |
| C  | -3.94227600 | -1.25235100 | 1.18439000  |
| H  | -4.19478800 | -1.91401800 | -2.12946600 |
| H  | -1.85396600 | -2.59292100 | -1.78450400 |
| H  | -2.19295800 | -1.60300900 | 2.38844200  |



|   |             |             |             |
|---|-------------|-------------|-------------|
| H | -4.52410100 | -0.84958500 | 2.01471900  |
| C | -5.93959400 | -0.88127800 | -0.29803700 |
| C | -0.50231800 | -2.65111400 | 0.62741500  |
| H | -0.45893100 | -3.04428300 | 1.64221100  |
| C | -6.98830600 | -1.83753200 | 0.28724500  |
| H | -6.77954700 | -1.94644200 | 1.36625300  |
| C | 0.24581800  | -3.56212200 | -0.30440000 |
| H | -0.22712500 | -4.55664100 | -0.24641000 |
| H | 0.24922100  | -3.22855500 | -1.34531600 |
| H | 1.28453100  | -3.67798800 | 0.02730900  |
| H | -6.13729600 | -0.76692700 | -1.37715600 |
| H | -6.07590600 | 0.11659700  | 0.15006000  |
| C | -6.90383500 | -3.21261300 | -0.35926600 |
| H | -7.06982000 | -3.13611400 | -1.44536100 |
| H | -5.92292000 | -3.67994300 | -0.20463700 |
| H | -7.66819000 | -3.88873300 | 0.04564700  |
| C | -8.38052200 | -1.24723600 | 0.11931800  |
| H | -9.14758500 | -1.90071900 | 0.55508100  |
| H | -8.46484600 | -0.26110000 | 0.59541200  |
| H | -8.61905500 | -1.12346200 | -0.94792900 |

**10a2**

|   |             |             |            |
|---|-------------|-------------|------------|
| C | -4.41855100 | -1.20530100 | 1.85353900 |
| O | -4.39843600 | 0.22711700  | 1.64277700 |
| C | -3.33634300 | -1.69112500 | 0.86511500 |
| H | -2.66401100 | -2.45720600 | 1.27919100 |
| C | -3.27124600 | 0.49904400  | 0.94587000 |
| N | -2.56977500 | -0.48539400 | 0.53953300 |
| C | -2.98610000 | 1.93507100  | 0.76504800 |
| C | -4.11611000 | 2.92148000  | 1.03817400 |
| C | -3.03801300 | 2.79401300  | 2.03215400 |
| H | -5.08166500 | 2.47401400  | 1.25503000 |
| H | -4.13303000 | 3.80151900  | 0.40163000 |

|   |             |             |             |
|---|-------------|-------------|-------------|
| H | -3.22768900 | 2.24528300  | 2.95118600  |
| H | -2.27621300 | 3.56622900  | 2.10188400  |
| C | -0.67831800 | 3.85211400  | -1.20248100 |
| O | -1.90942300 | 3.65622000  | -0.47301700 |
| C | -0.35581500 | 2.44994600  | -1.75156300 |
| H | -0.66611200 | 2.27258800  | -2.79146300 |
| C | -1.98239500 | 2.33162300  | -0.23783900 |
| N | -1.16641600 | 1.58040700  | -0.87896000 |
| C | -6.41161300 | -2.64409300 | -0.96871500 |
| C | -5.94609900 | -3.01854700 | -2.22583100 |
| C | -4.58347000 | -2.97582400 | -2.52195400 |
| C | -3.66143700 | -2.56230300 | -1.56504000 |
| C | -4.13336100 | -2.19832200 | -0.30969900 |
| C | -5.49439300 | -2.23085300 | -0.00991400 |
| H | -7.47777900 | -2.66897100 | -0.74317400 |
| H | -6.65364000 | -3.34138100 | -2.98813700 |
| H | -4.23578600 | -3.26080100 | -3.51322800 |
| H | -2.59824200 | -2.50243300 | -1.80175600 |
| C | -5.75206500 | -1.79383400 | 1.40662500  |
| H | -6.55982500 | -1.05625000 | 1.50390500  |
| H | -6.02205700 | -2.64436800 | 2.05040400  |
| C | 1.97266800  | 1.33566900  | -2.06664900 |
| C | 1.12342200  | 2.30602800  | -1.54868200 |
| C | 1.60212600  | 3.32373800  | -0.72407600 |
| C | 2.95036000  | 3.38016300  | -0.39834500 |
| C | 3.80784500  | 2.41230000  | -0.91612700 |
| C | 3.32587100  | 1.40177600  | -1.74635500 |
| H | 1.58459900  | 0.53694100  | -2.69954900 |
| H | 3.33172400  | 4.16743000  | 0.25116900  |
| H | 4.86957700  | 2.44663200  | -0.67183800 |
| H | 4.01057300  | 0.65302000  | -2.14201300 |
| C | 0.48714900  | 4.22403700  | -0.27108200 |
| H | 0.21283800  | 3.98609600  | 0.77017700  |

|    |             |             |             |
|----|-------------|-------------|-------------|
| H  | -0.87895000 | 4.60559800  | -1.96912000 |
| H  | 0.73806300  | 5.29161200  | -0.30971800 |
| H  | -4.18811700 | -1.37603600 | 2.91270500  |
| C  | 0.12185100  | 0.96569200  | 1.54257800  |
| N  | 0.28525300  | 1.75145700  | 2.39432600  |
| Cu | -0.28281700 | -0.13700000 | 0.00944600  |
| C  | -0.26101400 | -1.22406700 | -1.57668700 |
| N  | -0.22643800 | -1.87730900 | -2.54668400 |
| C  | 4.93917000  | -1.04730100 | 0.12726300  |
| C  | 4.33604500  | -0.45777800 | 1.24197800  |
| C  | 2.99069900  | -0.64278200 | 1.51198500  |
| C  | 2.19920100  | -1.43688700 | 0.66770500  |
| C  | 2.80023600  | -2.01378900 | -0.46517900 |
| C  | 4.14823000  | -1.83213100 | -0.71861500 |
| H  | 4.93754000  | 0.17018900  | 1.90071300  |
| H  | 2.53766200  | -0.13749000 | 2.36284700  |
| H  | 2.18245300  | -2.58876400 | -1.15536300 |
| H  | 4.59930500  | -2.28628800 | -1.60258700 |
| C  | 6.39611000  | -0.84907100 | -0.16903100 |
| C  | 0.79590600  | -1.72141200 | 0.94318100  |
| H  | 0.39498300  | -2.50920400 | 0.30291600  |
| C  | 7.26634500  | -2.07311300 | 0.15224700  |
| H  | 6.86700600  | -2.92739800 | -0.42226600 |
| C  | 0.28966900  | -1.83027700 | 2.35024100  |
| H  | 0.58864700  | -2.82031900 | 2.73436300  |
| H  | 0.68128000  | -1.06152800 | 3.02038900  |
| H  | -0.80483700 | -1.77892500 | 2.38892900  |
| H  | 6.78156100  | 0.01178900  | 0.40322900  |
| H  | 6.52307800  | -0.59776700 | -1.23561300 |
| C  | 7.20677200  | -2.41923800 | 1.63289600  |
| H  | 7.56449600  | -1.57208100 | 2.23912500  |
| H  | 6.18570700  | -2.65457000 | 1.95907600  |
| H  | 7.84346900  | -3.28342100 | 1.86336200  |

|   |            |             |             |
|---|------------|-------------|-------------|
| C | 8.70133400 | -1.82014400 | -0.28542800 |
| H | 9.33887900 | -2.69214200 | -0.08933200 |
| H | 8.76560300 | -1.58796000 | -1.35699200 |
| H | 9.12710500 | -0.96846900 | 0.26655500  |

### TS5a2

|   |            |             |             |
|---|------------|-------------|-------------|
| C | 4.37250500 | -1.21905800 | -1.87116400 |
| O | 4.37281600 | 0.21512200  | -1.66860200 |
| C | 3.29948300 | -1.69041200 | -0.86497700 |
| H | 2.60092100 | -2.43655300 | -1.27126800 |
| C | 3.26622900 | 0.50627400  | -0.94896900 |
| N | 2.56424500 | -0.46970000 | -0.52214600 |
| C | 2.99471700 | 1.94709800  | -0.78336400 |
| C | 4.12333100 | 2.92141400  | -1.09986200 |
| C | 3.02537400 | 2.77677200  | -2.07040400 |
| H | 5.08360400 | 2.46735100  | -1.32633800 |
| H | 4.15441400 | 3.81534800  | -0.48338800 |
| H | 3.20000500 | 2.20892700  | -2.98079300 |
| H | 2.26771800 | 3.55275300  | -2.14226300 |
| C | 0.70039500 | 3.91391800  | 1.15337300  |
| O | 1.90455500 | 3.70837900  | 0.38360600  |
| C | 0.43486700 | 2.53315700  | 1.78588100  |
| H | 0.76461800 | 2.42998100  | 2.82959400  |
| C | 2.01468700 | 2.37216400  | 0.23354100  |
| N | 1.25614000 | 1.63580000  | 0.95407000  |
| C | 6.38881900 | -2.69687900 | 0.91511700  |
| C | 5.93638300 | -3.08187600 | 2.17373500  |
| C | 4.57795000 | -3.03256300 | 2.48762500  |
| C | 3.64640800 | -2.59906400 | 1.54885400  |
| C | 4.10609700 | -2.22080200 | 0.29282300  |
| C | 5.46257200 | -2.26386900 | -0.02608800 |
| H | 7.45141700 | -2.73031700 | 0.67429800  |
| H | 6.65084900 | -3.42070400 | 2.92254000  |

|    |             |             |             |
|----|-------------|-------------|-------------|
| H  | 4.24007900  | -3.33011000 | 3.47857100  |
| H  | 2.58584600  | -2.54108300 | 1.79864300  |
| C  | 5.70644400  | -1.82029600 | -1.44291600 |
| H  | 6.51797000  | -1.08762700 | -1.54614700 |
| H  | 5.96303800  | -2.66913500 | -2.09432900 |
| C  | -1.83701700 | 1.32718800  | 2.16690300  |
| C  | -1.04064500 | 2.32245500  | 1.61315500  |
| C  | -1.57459400 | 3.28641500  | 0.75902500  |
| C  | -2.92674100 | 3.26807300  | 0.44472200  |
| C  | -3.73206500 | 2.27635100  | 0.99953900  |
| C  | -3.19411900 | 1.31657500  | 1.85561500  |
| H  | -1.40623000 | 0.56478100  | 2.81631800  |
| H  | -3.35009400 | 4.01370900  | -0.22767200 |
| H  | -4.79577900 | 2.24814400  | 0.76249500  |
| H  | -3.83895800 | 0.54835600  | 2.27985000  |
| C  | -0.50772900 | 4.21531800  | 0.25159800  |
| H  | -0.25388200 | 3.96173800  | -0.79109500 |
| H  | 0.91424800  | 4.70953200  | 1.87254600  |
| H  | -0.79819000 | 5.27357200  | 0.27089600  |
| H  | 4.12421900  | -1.39136400 | -2.92615400 |
| C  | -0.16190400 | 0.73054100  | -1.36267700 |
| N  | -0.32222200 | 1.58096200  | -2.15281100 |
| Cu | 0.42798000  | -0.18871100 | 0.20246900  |
| C  | 0.25697700  | -1.43157100 | 1.70369100  |
| N  | 0.09455100  | -2.21424500 | 2.55957300  |
| C  | -4.98855900 | -0.96114700 | -0.20700600 |
| C  | -4.48672100 | -0.33091100 | -1.34956700 |
| C  | -3.15155900 | -0.44293700 | -1.69964100 |
| C  | -2.27369100 | -1.19633100 | -0.90840600 |
| C  | -2.77049200 | -1.82141500 | 0.24678600  |
| C  | -4.11117000 | -1.71652100 | 0.57638800  |
| H  | -5.15957000 | 0.26985200  | -1.96316800 |
| H  | -2.77399100 | 0.08915400  | -2.57114500 |

|   |             |             |             |
|---|-------------|-------------|-------------|
| H | -2.08374800 | -2.36377400 | 0.89773500  |
| H | -4.48395700 | -2.20273600 | 1.47946600  |
| C | -6.43021700 | -0.83104100 | 0.18703700  |
| C | -0.87548200 | -1.39716400 | -1.27314500 |
| H | -0.37214100 | -2.11642300 | -0.62214100 |
| C | -7.26677200 | -2.08843100 | -0.09020100 |
| H | -6.79245800 | -2.93008400 | 0.44438000  |
| C | -0.45937100 | -1.56186800 | -2.70319000 |
| H | -0.77194600 | -2.57147600 | -3.01563100 |
| H | -0.91023300 | -0.83114900 | -3.37914800 |
| H | 0.62978800  | -1.49863900 | -2.80898400 |
| H | -6.88981200 | 0.01837800  | -0.34652100 |
| H | -6.49412800 | -0.59532200 | 1.26278400  |
| C | -7.29388400 | -2.41639700 | -1.57591500 |
| H | -7.72927700 | -1.57991300 | -2.14508600 |
| H | -6.28820500 | -2.60285000 | -1.97377100 |
| H | -7.90632800 | -3.30575500 | -1.77395400 |
| C | -8.67794400 | -1.90326500 | 0.44739700  |
| H | -9.28921900 | -2.80035500 | 0.28365200  |
| H | -8.67844700 | -1.68530400 | 1.52381600  |
| H | -9.17689800 | -1.06539800 | -0.06289400 |

**10a3**

|   |             |            |             |
|---|-------------|------------|-------------|
| C | 1.95451900  | 2.40757100 | -1.29016800 |
| O | 0.64013100  | 2.94250000 | -1.57502500 |
| C | 1.65793000  | 1.39452900 | -0.16696400 |
| H | 2.17369800  | 0.43615700 | -0.29575900 |
| C | -0.24865300 | 2.11917500 | -0.97173900 |
| N | 0.20694300  | 1.18713700 | -0.23045200 |
| C | -1.66129000 | 2.40950000 | -1.28273000 |
| C | -1.98790300 | 3.76469400 | -1.89939500 |
| C | -2.00531800 | 2.57433700 | -2.76556800 |
| H | -1.15216800 | 4.45379200 | -1.97658900 |

|   |             |             |             |
|---|-------------|-------------|-------------|
| H | -2.93624500 | 4.20053000  | -1.59837800 |
| H | -1.17850100 | 2.40419100  | -3.45032500 |
| H | -2.95767500 | 2.15010500  | -3.07350900 |
| C | -4.82380500 | 1.29146100  | -0.01742500 |
| O | -3.95301400 | 2.24130300  | -0.66580300 |
| C | -3.89510400 | 0.56570100  | 0.97449500  |
| H | -3.92816900 | 0.93968600  | 2.00801100  |
| C | -2.70158900 | 1.78648700  | -0.44916900 |
| N | -2.56082100 | 0.85947700  | 0.42219600  |
| C | 3.20920900  | 4.13028700  | 1.79104000  |
| C | 3.00137800  | 3.75120900  | 3.11418300  |
| C | 2.33517000  | 2.56353400  | 3.41765200  |
| C | 1.86930300  | 1.73183100  | 2.40348600  |
| C | 2.08541800  | 2.11426700  | 1.08511200  |
| C | 2.74435600  | 3.30311000  | 0.77540500  |
| H | 3.72254300  | 5.06310200  | 1.55694800  |
| H | 3.35621100  | 4.39175400  | 3.92036000  |
| H | 2.16943800  | 2.28638200  | 4.45722200  |
| H | 1.32342000  | 0.81617100  | 2.63613100  |
| C | 2.86414100  | 3.48787400  | -0.71357700 |
| H | 2.56331300  | 4.48463600  | -1.06322600 |
| H | 3.89766200  | 3.33156100  | -1.05793800 |
| C | -3.92954400 | -1.93654800 | 1.68325300  |
| C | -4.28822000 | -0.87752900 | 0.85870900  |
| C | -5.10339900 | -1.07147200 | -0.25579900 |
| C | -5.56796700 | -2.34170900 | -0.56823500 |
| C | -5.20829900 | -3.40963000 | 0.25017700  |
| C | -4.39948700 | -3.21008000 | 1.36856300  |
| H | -3.28546200 | -1.77323900 | 2.54804200  |
| H | -6.20096900 | -2.50238100 | -1.44023800 |
| H | -5.56931300 | -4.41042300 | 0.01849100  |
| H | -4.13981500 | -4.05386200 | 2.00662500  |
| C | -5.32266700 | 0.21672000  | -0.99775400 |

|    |             |             |             |
|----|-------------|-------------|-------------|
| H  | -4.70104100 | 0.23971300  | -1.90798400 |
| H  | -5.63125300 | 1.86280600  | 0.44871800  |
| H  | -6.36305400 | 0.37395600  | -1.30916300 |
| H  | 2.32752400  | 1.95967200  | -2.22072300 |
| C  | -1.69859600 | -0.94075700 | -1.59003200 |
| N  | -2.09527800 | -0.93420200 | -2.69074000 |
| Cu | -1.12254400 | -0.72880200 | 0.23049200  |
| C  | -0.71269100 | -0.83798600 | 2.10273200  |
| N  | -0.47785800 | -0.88007700 | 3.24802300  |
| C  | 3.96920200  | -1.49495300 | -0.51783500 |
| C  | 3.43896900  | -1.70628300 | 0.76012500  |
| C  | 2.10575800  | -2.03955400 | 0.94002800  |
| C  | 1.25381800  | -2.18090900 | -0.16745700 |
| C  | 1.77866300  | -1.94231100 | -1.44989900 |
| C  | 3.11394400  | -1.61602700 | -1.61965800 |
| H  | 4.08927400  | -1.59652100 | 1.62874500  |
| H  | 1.70679500  | -2.16025000 | 1.94607800  |
| H  | 1.11390800  | -2.01349700 | -2.31178000 |
| H  | 3.50766300  | -1.44170700 | -2.62242900 |
| C  | 5.41835800  | -1.16388900 | -0.71889100 |
| C  | -0.13444000 | -2.61528000 | -0.05440000 |
| C  | 6.25585200  | -2.34781000 | -1.22619200 |
| H  | 5.80349700  | -2.69701900 | -2.17120800 |
| C  | -0.58544600 | -3.56671300 | 1.00789900  |
| H  | -0.22213800 | -4.56945900 | 0.72464500  |
| H  | -0.21790500 | -3.32648700 | 2.00810900  |
| H  | -1.68040400 | -3.61454200 | 1.04339900  |
| H  | -0.56082400 | -2.86760000 | -1.02458100 |
| H  | 5.51057600  | -0.33550600 | -1.44025300 |
| H  | 5.85665600  | -0.80569200 | 0.22724500  |
| C  | 7.67972600  | -1.89143400 | -1.50769300 |
| H  | 8.15769800  | -1.53140200 | -0.58413400 |
| H  | 8.29315600  | -2.71409900 | -1.89763300 |



|   |            |             |             |
|---|------------|-------------|-------------|
| H | 7.70832500 | -1.07206200 | -2.23855600 |
| C | 6.24535900 | -3.50074400 | -0.23316700 |
| H | 6.65560400 | -3.17613000 | 0.73594300  |
| H | 5.23181900 | -3.88225900 | -0.05525000 |
| H | 6.86215500 | -4.33557800 | -0.59057800 |

### TS5a3

|   |             |            |             |
|---|-------------|------------|-------------|
| C | 1.95564100  | 2.49970500 | -1.25780400 |
| O | 0.63378600  | 2.98586200 | -1.59493400 |
| C | 1.65602900  | 1.46140200 | -0.15731800 |
| H | 2.20114400  | 0.51777000 | -0.28252500 |
| C | -0.24903200 | 2.13378300 | -1.02852500 |
| N | 0.21457700  | 1.21393900 | -0.27535800 |
| C | -1.65819700 | 2.36587700 | -1.39994000 |
| C | -2.00593600 | 3.67389500 | -2.10018500 |
| C | -1.94396300 | 2.44020800 | -2.90194400 |
| H | -1.19476900 | 4.39137900 | -2.18142900 |
| H | -2.98192300 | 4.08625700 | -1.86035900 |
| H | -1.08232100 | 2.27188800 | -3.54327400 |
| H | -2.86407400 | 1.95953200 | -3.22388100 |
| C | -4.82442900 | 1.18002500 | -0.19837900 |
| O | -3.97140600 | 2.10176400 | -0.90816700 |
| C | -3.91099700 | 0.62147400 | 0.91021800  |
| H | -4.02890200 | 1.10014800 | 1.89303900  |
| C | -2.71101400 | 1.75623500 | -0.56915100 |
| N | -2.56462900 | 0.93943700 | 0.40415800  |
| C | 3.04036900  | 4.22042400 | 1.88996000  |
| C | 2.81508400  | 3.80683800 | 3.19981700  |
| C | 2.19521800  | 2.58511700 | 3.46378400  |
| C | 1.79104500  | 1.75397400 | 2.42304100  |
| C | 2.02065900  | 2.17365900 | 1.11824100  |
| C | 2.63735000  | 3.39427400 | 0.84748500  |
| H | 3.52040900  | 5.17785100 | 1.68661600  |

|    |             |             |             |
|----|-------------|-------------|-------------|
| H  | 3.12163400  | 4.44583600  | 4.02673500  |
| H  | 2.01802100  | 2.27883900  | 4.49315300  |
| H  | 1.28483900  | 0.80892600  | 2.62667300  |
| C  | 2.79395700  | 3.61115700  | -0.63369400 |
| H  | 2.45447800  | 4.59784300  | -0.97656000 |
| H  | 3.84410600  | 3.51313900  | -0.94742400 |
| C  | -3.85448100 | -1.78398800 | 1.89590500  |
| C  | -4.22024100 | -0.84640900 | 0.93804400  |
| C  | -4.97394000 | -1.20598200 | -0.17939400 |
| C  | -5.37211600 | -2.52447200 | -0.35581100 |
| C  | -5.01371400 | -3.46998200 | 0.60309100  |
| C  | -4.26292200 | -3.10440200 | 1.72053500  |
| H  | -3.24526900 | -1.49547700 | 2.75223700  |
| H  | -5.96001000 | -2.81520000 | -1.22596200 |
| H  | -5.32872500 | -4.50537000 | 0.48102300  |
| H  | -3.99189500 | -3.85481400 | 2.46155800  |
| C  | -5.22024200 | -0.02186600 | -1.07207700 |
| H  | -4.55647700 | -0.06257100 | -1.95154100 |
| H  | -5.68267900 | 1.75246400  | 0.16470600  |
| H  | -6.25151300 | 0.04181300  | -1.44191200 |
| H  | 2.38481000  | 2.07851000  | -2.17650600 |
| C  | -1.54054100 | -1.03508500 | -1.42404200 |
| N  | -2.04989200 | -0.92711400 | -2.47404000 |
| Cu | -1.00256800 | -0.58057300 | 0.35027300  |
| C  | -0.59211700 | -0.88832300 | 2.23796000  |
| N  | -0.34369400 | -1.14306700 | 3.35378800  |
| C  | 3.92476400  | -1.51881600 | -0.52483200 |
| C  | 3.27394600  | -1.85616200 | 0.66619600  |
| C  | 1.92021200  | -2.15691100 | 0.69065500  |
| C  | 1.17257200  | -2.13783100 | -0.49578400 |
| C  | 1.82004000  | -1.78722000 | -1.69134200 |
| C  | 3.17194200  | -1.48545600 | -1.70458900 |
| H  | 3.84348200  | -1.87450800 | 1.59594200  |

|   |             |             |             |
|---|-------------|-------------|-------------|
| H | 1.43192000  | -2.37513000 | 1.63850400  |
| H | 1.23854500  | -1.74768300 | -2.61385100 |
| H | 3.66088100  | -1.21728500 | -2.64274300 |
| C | 5.39554100  | -1.22453000 | -0.55632600 |
| C | -0.23744400 | -2.54245300 | -0.56588800 |
| C | 6.24523100  | -2.38593000 | -1.09438900 |
| H | 5.87660700  | -2.62916500 | -2.10674700 |
| C | -0.87290000 | -3.47747000 | 0.41710700  |
| H | -0.48863900 | -4.48786500 | 0.19724100  |
| H | -0.67034000 | -3.23625300 | 1.46359200  |
| H | -1.95988700 | -3.49886200 | 0.27258600  |
| H | -0.48934000 | -2.84059500 | -1.58263800 |
| H | 5.58112800  | -0.33652600 | -1.18208700 |
| H | 5.74941000  | -0.97300800 | 0.45706600  |
| C | 7.70141200  | -1.95667800 | -1.19668200 |
| H | 8.09740900  | -1.70135900 | -0.20220100 |
| H | 8.32744700  | -2.76094700 | -1.60455700 |
| H | 7.82239300  | -1.07436500 | -1.83952300 |
| C | 6.10927500  | -3.62541000 | -0.22220300 |
| H | 6.43397700  | -3.40761300 | 0.80730200  |
| H | 5.07373600  | -3.98578700 | -0.17571900 |
| H | 6.73493700  | -4.44458500 | -0.59992400 |

#### 10a4

|   |             |            |             |
|---|-------------|------------|-------------|
| C | 2.53532900  | 2.77903400 | 0.05272000  |
| O | 1.64692200  | 2.46093600 | 1.14779600  |
| C | 2.61491600  | 1.45038400 | -0.72981600 |
| H | 2.36433100  | 1.56182200 | -1.79411100 |
| C | 1.16658400  | 1.22359900 | 0.94468500  |
| N | 1.59668100  | 0.60332600 | -0.09000200 |
| C | 0.19260300  | 0.78607000 | 1.96185000  |
| C | 0.32220000  | 1.42449100 | 3.34116900  |
| C | -0.78291400 | 1.85405800 | 2.46772600  |

|   |             |             |             |
|---|-------------|-------------|-------------|
| H | 1.16913400  | 2.09119200  | 3.47115400  |
| H | 0.10328500  | 0.76693500  | 4.17697300  |
| H | -0.72380700 | 2.82038500  | 1.97157200  |
| H | -1.78885800 | 1.49445700  | 2.67752500  |
| C | -1.58579600 | -2.25168300 | 2.70820300  |
| O | -0.97565400 | -0.98719200 | 3.03584400  |
| C | -0.88955900 | -2.66902300 | 1.39484000  |
| H | -0.07518100 | -3.40039100 | 1.50821700  |
| C | -0.34162400 | -0.58819100 | 1.91222500  |
| N | -0.28913400 | -1.40556700 | 0.93803600  |
| C | 6.07544600  | 1.61573100  | 0.56502300  |
| C | 6.64773900  | 0.42431900  | 0.13064500  |
| C | 5.91374300  | -0.48577100 | -0.63011200 |
| C | 4.59175100  | -0.21795400 | -0.96508000 |
| C | 4.02160600  | 0.96713300  | -0.51760000 |
| C | 4.75181300  | 1.88291200  | 0.23571700  |
| H | 6.65511100  | 2.32459400  | 1.15584500  |
| H | 7.68052100  | 0.19783900  | 0.38974200  |
| H | 6.37264200  | -1.41782900 | -0.95221600 |
| H | 4.00857700  | -0.93777500 | -1.54079300 |
| C | 3.94037400  | 3.10825300  | 0.55917900  |
| H | 3.91316000  | 3.34618700  | 1.63112400  |
| H | 4.33290300  | 4.00050700  | 0.05041500  |
| C | -1.92071200 | -3.79382600 | -0.71038000 |
| C | -2.00878300 | -3.14119100 | 0.51336200  |
| C | -3.24362100 | -2.79240400 | 1.06031800  |
| C | -4.41801500 | -3.08051400 | 0.37592200  |
| C | -4.33684200 | -3.72166600 | -0.85834900 |
| C | -3.10004300 | -4.07792700 | -1.39583600 |
| H | -0.95046200 | -4.06404500 | -1.12985200 |
| H | -5.38739200 | -2.81364800 | 0.79708000  |
| H | -5.24919300 | -3.95438000 | -1.40519800 |
| H | -3.05383400 | -4.58819500 | -2.35607900 |

|    |             |             |             |
|----|-------------|-------------|-------------|
| C  | -3.07791900 | -2.08393000 | 2.37669900  |
| H  | -3.30273900 | -1.00814500 | 2.28573600  |
| H  | -1.40268400 | -2.92287200 | 3.55136700  |
| H  | -3.73310700 | -2.47667800 | 3.16512300  |
| H  | 2.06258600  | 3.60009800  | -0.49931900 |
| C  | 2.47556100  | -2.05382200 | 0.63777000  |
| N  | 3.09154800  | -2.45232200 | 1.54842000  |
| Cu | 1.20916000  | -1.28875900 | -0.69735600 |
| C  | 1.28420900  | -2.82678800 | -1.76641600 |
| N  | 1.31104000  | -3.80129000 | -2.41032700 |
| C  | -2.60864700 | 2.32536700  | -0.48124800 |
| C  | -1.44714700 | 2.68738300  | -1.17011400 |
| C  | -0.63678600 | 1.73023300  | -1.76442300 |
| C  | -0.94877600 | 0.36354800  | -1.68357800 |
| C  | -2.13629300 | 0.00947000  | -1.01988600 |
| C  | -2.94380400 | 0.96776200  | -0.43050000 |
| H  | -1.18441900 | 3.74450000  | -1.24707700 |
| H  | 0.25383800  | 2.04869900  | -2.30711700 |
| H  | -2.41423800 | -1.04322600 | -0.96815900 |
| H  | -3.86168500 | 0.66081000  | 0.07717300  |
| C  | -3.50381600 | 3.35515000  | 0.14360600  |
| C  | -0.11136300 | -0.68493400 | -2.26916500 |
| H  | -0.67538300 | -1.61001000 | -2.40705200 |
| C  | -4.77295800 | 3.65227200  | -0.66896700 |
| H  | -5.31481400 | 2.69909500  | -0.80038600 |
| C  | 0.76583500  | -0.35605700 | -3.44773000 |
| H  | 0.17029400  | 0.14059400  | -4.23144300 |
| H  | 1.59600900  | 0.32044100  | -3.20347300 |
| H  | 1.20206200  | -1.26762900 | -3.86682500 |
| H  | -3.80550600 | 3.02080900  | 1.15043000  |
| H  | -2.95059000 | 4.30021400  | 0.28187200  |
| C  | -4.43501700 | 4.20571100  | -2.04541200 |
| H  | -3.85887000 | 5.13995400  | -1.95244200 |

|   |             |            |             |
|---|-------------|------------|-------------|
| H | -3.83674600 | 3.50097700 | -2.63662800 |
| H | -5.34592800 | 4.43479400 | -2.61356600 |
| C | -5.66512400 | 4.61845600 | 0.09625800  |
| H | -6.59380700 | 4.82450700 | -0.45153100 |
| H | -5.93617300 | 4.22692600 | 1.08603000  |
| H | -5.15065400 | 5.57960900 | 0.24737200  |

**TS5a4**

|   |             |             |             |
|---|-------------|-------------|-------------|
| C | -2.76009800 | -2.54909500 | -0.43148300 |
| O | -1.91736500 | -2.42172900 | 0.73826200  |
| C | -2.87928600 | -1.08617800 | -0.89944000 |
| H | -2.78209100 | -0.96390300 | -1.98766000 |
| C | -1.36403300 | -1.19462200 | 0.70236900  |
| N | -1.76120100 | -0.40442100 | -0.22476000 |
| C | -0.39185000 | -0.94743400 | 1.78273600  |
| C | -0.66594000 | -1.67237400 | 3.10052800  |
| C | 0.44922500  | -2.13229700 | 2.25615100  |
| H | -1.57494400 | -2.26589800 | 3.12590400  |
| H | -0.44446700 | -1.10363400 | 3.99848400  |
| H | 0.33574200  | -3.05099400 | 1.68562600  |
| H | 1.46680300  | -1.88472000 | 2.55353100  |
| C | 1.59619700  | 1.84300900  | 2.87391500  |
| O | 0.86100300  | 0.61818900  | 3.06245200  |
| C | 0.99201100  | 2.44093800  | 1.58691400  |
| H | 0.23354000  | 3.22284100  | 1.74042800  |
| C | 0.25266200  | 0.37556800  | 1.87962600  |
| N | 0.31282300  | 1.27959000  | 0.98518900  |
| C | -6.19723300 | -1.58152000 | 0.67239500  |
| C | -6.74433900 | -0.30226500 | 0.70820300  |
| C | -6.03815100 | 0.78830500  | 0.20146100  |
| C | -4.77439800 | 0.61821200  | -0.35455400 |
| C | -4.23192100 | -0.66026200 | -0.38512800 |
| C | -4.93267300 | -1.75366600 | 0.12351400  |

|    |             |             |             |
|----|-------------|-------------|-------------|
| H  | -6.74823800 | -2.43155600 | 1.07461100  |
| H  | -7.73069900 | -0.15047600 | 1.14363100  |
| H  | -6.46805300 | 1.78639400  | 0.25309500  |
| H  | -4.20964900 | 1.47660500  | -0.71406400 |
| C  | -4.15127200 | -3.02820000 | -0.03841200 |
| H  | -4.11169400 | -3.64672200 | 0.86814600  |
| H  | -4.56789500 | -3.66245300 | -0.83513800 |
| C  | 2.19760900  | 3.69335900  | -0.34222200 |
| C  | 2.18159900  | 2.90212100  | 0.79905100  |
| C  | 3.35969700  | 2.39249200  | 1.34466500  |
| C  | 4.58117700  | 2.65500100  | 0.73653200  |
| C  | 4.60319400  | 3.43094200  | -0.42109700 |
| C  | 3.42282300  | 3.94884800  | -0.95485100 |
| H  | 1.27214100  | 4.09281600  | -0.75641500 |
| H  | 5.50818700  | 2.26549200  | 1.15783800  |
| H  | 5.55366200  | 3.64474200  | -0.90753900 |
| H  | 3.45653000  | 4.56398300  | -1.85210800 |
| C  | 3.07950700  | 1.56881600  | 2.57173000  |
| H  | 3.20782200  | 0.49123100  | 2.37257500  |
| H  | 1.44384900  | 2.44953400  | 3.77064700  |
| H  | 3.73600200  | 1.81342100  | 3.41687400  |
| H  | -2.23707900 | -3.21833200 | -1.12749000 |
| C  | -2.19842000 | 2.66286500  | 0.21582900  |
| N  | -2.84542700 | 3.34410900  | 0.91318800  |
| Cu | -0.98501600 | 1.46695400  | -0.78492400 |
| C  | -0.49837600 | 2.68888900  | -2.10894700 |
| N  | -0.39863800 | 3.66640000  | -2.74553200 |
| C  | 2.48345400  | -2.26724600 | -0.43466600 |
| C  | 1.28915500  | -2.55560900 | -1.09929400 |
| C  | 0.57487700  | -1.56303700 | -1.75712800 |
| C  | 1.03353300  | -0.23918200 | -1.77844500 |
| C  | 2.24232100  | 0.04455700  | -1.12542600 |
| C  | 2.94575600  | -0.94714300 | -0.46179300 |

|   |             |             |             |
|---|-------------|-------------|-------------|
| H | 0.91867900  | -3.58333600 | -1.10594200 |
| H | -0.34512900 | -1.82429700 | -2.27971500 |
| H | 2.62292400  | 1.06664300  | -1.13827000 |
| H | 3.88732000  | -0.69807000 | 0.03305600  |
| C | 3.28699300  | -3.33935200 | 0.24220100  |
| C | 0.36017700  | 0.82458200  | -2.55294600 |
| H | 1.11140500  | 1.54038700  | -2.88782000 |
| C | 4.50882700  | -3.80189400 | -0.56557900 |
| H | 5.13383900  | -2.91285500 | -0.76138400 |
| C | -0.57078000 | 0.41850500  | -3.66520500 |
| H | -0.05259400 | -0.28510900 | -4.33479800 |
| H | -1.47963200 | -0.07837500 | -3.30431100 |
| H | -0.88061600 | 1.29195300  | -4.24514700 |
| H | 3.63689300  | -2.97611300 | 1.22319800  |
| H | 2.65053800  | -4.21859200 | 0.44339900  |
| C | 4.09782300  | -4.40327600 | -1.90141600 |
| H | 3.44246600  | -5.27466600 | -1.74458500 |
| H | 3.55418900  | -3.68379700 | -2.52669800 |
| H | 4.97423100  | -4.74685400 | -2.46608400 |
| C | 5.32104100  | -4.79928300 | 0.24716600  |
| H | 6.21691000  | -5.12369100 | -0.29795200 |
| H | 5.64452900  | -4.37577000 | 1.20756100  |
| H | 4.72269400  | -5.69739200 | 0.46330200  |

**10a5**

|   |             |            |             |
|---|-------------|------------|-------------|
| C | -0.19847400 | 3.52383200 | -2.08076600 |
| O | -1.59201800 | 3.31815900 | -1.75869300 |
| C | 0.50343000  | 2.41743200 | -1.26920500 |
| H | 1.19878500  | 1.82111600 | -1.87635700 |
| C | -1.69766100 | 2.17774900 | -1.06112800 |
| N | -0.59852800 | 1.56018800 | -0.80490600 |
| C | -3.06740100 | 1.85651000 | -0.63713000 |
| C | -3.80590000 | 3.04171900 | -0.00152500 |



|   |             |             |             |
|---|-------------|-------------|-------------|
| C | -4.21599100 | 2.57958600  | -1.33691200 |
| H | -3.22386100 | 3.95497300  | 0.08479500  |
| H | -4.40466300 | 2.78775300  | 0.86763800  |
| H | -3.94882100 | 3.17554900  | -2.20495300 |
| H | -5.13266900 | 2.00184400  | -1.42336400 |
| C | -4.74196500 | -0.92754000 | 0.88477900  |
| O | -4.59878800 | 0.44534300  | 0.48219300  |
| C | -3.29924300 | -1.46138400 | 0.87604800  |
| H | -2.79674700 | -1.43883200 | 1.85509200  |
| C | -3.36509100 | 0.53221900  | -0.05881700 |
| N | -2.59881700 | -0.48675300 | 0.00723900  |
| C | 1.52423200  | 5.39430700  | 0.67855000  |
| C | 2.18109600  | 4.86134300  | 1.78316400  |
| C | 2.33299500  | 3.48245900  | 1.92576500  |
| C | 1.83092400  | 2.61481100  | 0.96257500  |
| C | 1.17330600  | 3.15174800  | -0.13833600 |
| C | 1.01677100  | 4.52875500  | -0.28282000 |
| H | 1.40307200  | 6.47218500  | 0.57431200  |
| H | 2.57395700  | 5.52751700  | 2.54918100  |
| H | 2.83580400  | 3.08010200  | 2.80243600  |
| H | 1.93848600  | 1.53571600  | 1.08485500  |
| C | 0.29195800  | 4.87129900  | -1.55556800 |
| H | -0.55224400 | 5.55865700  | -1.41123400 |
| H | 0.96065000  | 5.34478800  | -2.28922500 |
| C | -2.52980400 | -3.89702000 | 0.39143300  |
| C | -3.43504000 | -2.84655200 | 0.31822400  |
| C | -4.68753600 | -3.01373500 | -0.27432200 |
| C | -5.03523000 | -4.23202600 | -0.84293300 |
| C | -4.11741800 | -5.27943700 | -0.80208000 |
| C | -2.87892300 | -5.11685600 | -0.18269500 |
| H | -1.58155100 | -3.76337000 | 0.91412600  |
| H | -6.01446500 | -4.37326200 | -1.30049800 |
| H | -4.37920400 | -6.24185300 | -1.23937100 |

|    |             |             |             |
|----|-------------|-------------|-------------|
| H  | -2.18671700 | -5.95568700 | -0.13217300 |
| C  | -5.51158400 | -1.76038200 | -0.15397800 |
| H  | -5.55010700 | -1.20560000 | -1.10495200 |
| H  | -5.21581500 | -0.92744000 | 1.87014300  |
| H  | -6.55094400 | -1.95339600 | 0.14129700  |
| H  | -0.11194500 | 3.41679200  | -3.16795900 |
| C  | -1.16273600 | 1.18231800  | 1.99614500  |
| N  | -1.82580600 | 1.86967800  | 2.67230500  |
| Cu | -0.34828300 | 0.07215800  | 0.53209100  |
| C  | 0.00885900  | -1.42295000 | 1.59112600  |
| N  | 0.07918000  | -2.37704600 | 2.26266800  |
| C  | 4.94439800  | -1.40560400 | 0.23696300  |
| C  | 4.03727100  | -2.41765900 | 0.56707500  |
| C  | 2.69597100  | -2.32290100 | 0.23782500  |
| C  | 2.20098800  | -1.20217600 | -0.44836000 |
| C  | 3.11713700  | -0.19216400 | -0.78256700 |
| C  | 4.45824800  | -0.28945300 | -0.44663800 |
| H  | 4.39694700  | -3.29611700 | 1.10437900  |
| H  | 2.01240100  | -3.10804300 | 0.55183400  |
| H  | 2.76973800  | 0.68820900  | -1.32402900 |
| H  | 5.14491100  | 0.51427500  | -0.71705000 |
| C  | 6.40347800  | -1.52092400 | 0.56592300  |
| C  | 0.79629700  | -1.07971700 | -0.85783800 |
| H  | 0.66168800  | -0.27513600 | -1.58802700 |
| C  | 7.27944200  | -1.90205900 | -0.63695700 |
| H  | 7.11876500  | -1.14135400 | -1.42156100 |
| C  | 0.02771900  | -2.30268900 | -1.25706700 |
| H  | 0.43248500  | -2.67602400 | -2.21264900 |
| H  | 0.09993400  | -3.11141500 | -0.52404100 |
| H  | -1.03382500 | -2.07315200 | -1.40458500 |
| H  | 6.76666400  | -0.56429200 | 0.97453200  |
| H  | 6.55110200  | -2.27476000 | 1.35709100  |
| C  | 6.89130300  | -3.26151900 | -1.19977600 |

|   |            |             |             |
|---|------------|-------------|-------------|
| H | 7.00574500 | -4.04151700 | -0.43066500 |
| H | 5.84893200 | -3.28233000 | -1.54239500 |
| H | 7.53218700 | -3.53663900 | -2.04774000 |
| C | 8.74713100 | -1.88474600 | -0.23600100 |
| H | 9.39760900 | -2.12784700 | -1.08644300 |
| H | 9.05136700 | -0.90409700 | 0.15397700  |
| H | 8.93906900 | -2.62995300 | 0.55073700  |

**TS5a5**

|   |             |             |             |
|---|-------------|-------------|-------------|
| C | -0.13650300 | 3.40095000  | -2.18691300 |
| O | -1.52195800 | 3.28997100  | -1.78755400 |
| C | 0.54792300  | 2.36649600  | -1.27521700 |
| H | 1.26610800  | 1.73115900  | -1.81462700 |
| C | -1.64388800 | 2.18288800  | -1.03659000 |
| N | -0.56081000 | 1.54653800  | -0.76673600 |
| C | -3.00682100 | 1.91683200  | -0.55624400 |
| C | -3.65265900 | 3.12338000  | 0.13629800  |
| C | -4.15254900 | 2.70366800  | -1.18370100 |
| H | -3.02274200 | 4.00645500  | 0.20474800  |
| H | -4.21743700 | 2.88482600  | 1.03233000  |
| H | -3.90183100 | 3.30104400  | -2.05567200 |
| H | -5.10050700 | 2.17386800  | -1.22957000 |
| C | -4.74320700 | -0.83013300 | 0.96288200  |
| O | -4.54711800 | 0.54569800  | 0.59567200  |
| C | -3.33210300 | -1.43769100 | 0.86592400  |
| H | -2.79377000 | -1.49395500 | 1.82406600  |
| C | -3.33402700 | 0.59355800  | 0.00874500  |
| N | -2.61183900 | -0.46096100 | 0.01576300  |
| C | 1.57937200  | 5.51437700  | 0.38043600  |
| C | 2.16158700  | 5.09243100  | 1.57181000  |
| C | 2.24671900  | 3.73556200  | 1.88141200  |
| C | 1.75705700  | 2.77839700  | 0.99940100  |
| C | 1.18352700  | 3.20344200  | -0.19351700 |

|    |             |             |             |
|----|-------------|-------------|-------------|
| C  | 1.08626200  | 4.56007200  | -0.50059200 |
| H  | 1.50229900  | 6.57626900  | 0.14818600  |
| H  | 2.54280000  | 5.82979500  | 2.27603700  |
| H  | 2.68330200  | 3.42147700  | 2.82698100  |
| H  | 1.79834600  | 1.72007000  | 1.26034100  |
| C  | 0.42308500  | 4.77408100  | -1.83360400 |
| H  | -0.37492300 | 5.52808700  | -1.81562500 |
| H  | 1.14338000  | 5.09529000  | -2.60054700 |
| C  | -2.70475500 | -3.87402400 | 0.20328500  |
| C  | -3.56215100 | -2.78218200 | 0.24098600  |
| C  | -4.84853400 | -2.85889500 | -0.29489800 |
| C  | -5.28070000 | -4.02366100 | -0.91535200 |
| C  | -4.41244000 | -5.11056900 | -0.98527900 |
| C  | -3.13840200 | -5.03995300 | -0.42325700 |
| H  | -1.72715900 | -3.81633600 | 0.68369000  |
| H  | -6.28691700 | -4.09304600 | -1.32880300 |
| H  | -4.74007200 | -6.03186700 | -1.46470600 |
| H  | -2.48417800 | -5.90955300 | -0.45886300 |
| C  | -5.60808800 | -1.58135700 | -0.06289300 |
| H  | -5.68306500 | -0.97902500 | -0.98214500 |
| H  | -5.16731700 | -0.83764000 | 1.97055400  |
| H  | -6.63439600 | -1.74853100 | 0.28876000  |
| H  | -0.09839900 | 3.16670700  | -3.25746300 |
| C  | -1.12530400 | 1.08722000  | 2.12782200  |
| N  | -1.76812800 | 1.75951700  | 2.83794700  |
| Cu | -0.38391400 | 0.02609600  | 0.61985900  |
| C  | 0.02572800  | -1.61745900 | 1.38928800  |
| N  | 0.04566000  | -2.60672300 | 2.01381600  |
| C  | 4.98750500  | -1.60415300 | 0.35650500  |
| C  | 4.13077200  | -2.70159600 | 0.48393500  |
| C  | 2.78450100  | -2.60702600 | 0.17111900  |
| C  | 2.24329800  | -1.40283500 | -0.29755700 |
| C  | 3.10395800  | -0.30450000 | -0.42653700 |

|   |             |             |             |
|---|-------------|-------------|-------------|
| C | 4.44847700  | -0.40117300 | -0.10402500 |
| H | 4.53312300  | -3.64753200 | 0.84864400  |
| H | 2.13623600  | -3.46700200 | 0.32535800  |
| H | 2.70907600  | 0.64820800  | -0.78166900 |
| H | 5.09498500  | 0.47168000  | -0.20672600 |
| C | 6.45120200  | -1.71052300 | 0.66856700  |
| C | 0.82955400  | -1.26781100 | -0.68241900 |
| H | 0.67804100  | -0.37208400 | -1.29424000 |
| C | 7.34310200  | -1.80713700 | -0.57805100 |
| H | 7.14305100  | -0.91778100 | -1.20185300 |
| C | 0.08896200  | -2.42935400 | -1.27363300 |
| H | 0.50352400  | -2.62838900 | -2.27494500 |
| H | 0.17950600  | -3.34320200 | -0.67954600 |
| H | -0.97662300 | -2.19719500 | -1.38587500 |
| H | 6.76669300  | -0.83520300 | 1.25854500  |
| H | 6.63689000  | -2.59561200 | 1.29954600  |
| C | 7.02320900  | -3.04956000 | -1.39641100 |
| H | 7.17817400  | -3.95688900 | -0.79164500 |
| H | 5.98278600  | -3.05582000 | -1.74558500 |
| H | 7.67598400  | -3.12314700 | -2.27613200 |
| C | 8.80876100  | -1.79476200 | -0.16955400 |
| H | 9.46908500  | -1.83542000 | -1.04577400 |
| H | 9.06376300  | -0.89450200 | 0.40554700  |
| H | 9.03956400  | -2.66795700 | 0.45926600  |

**10a6**

|   |            |             |             |
|---|------------|-------------|-------------|
| C | 4.36760900 | -0.72180700 | -2.07294500 |
| O | 3.85221100 | 0.63234400  | -2.18308700 |
| C | 3.59792100 | -1.29165200 | -0.85504800 |
| H | 3.05934900 | -2.23044600 | -1.05278800 |
| C | 2.86298600 | 0.74196000  | -1.27061800 |
| N | 2.62173600 | -0.25226500 | -0.51849700 |
| C | 2.14745200 | 2.03279400  | -1.26817800 |

|   |             |             |             |
|---|-------------|-------------|-------------|
| C | 2.96194300  | 3.25808400  | -1.66214700 |
| C | 1.95825800  | 2.74135400  | -2.60989700 |
| H | 4.01011500  | 3.06236200  | -1.86964200 |
| H | 2.74779700  | 4.17315900  | -1.11930900 |
| H | 2.29018100  | 2.18991700  | -3.48657400 |
| H | 1.02328700  | 3.28810300  | -2.72294000 |
| C | -0.31593800 | 3.51589000  | 0.90015000  |
| O | 0.81963700  | 3.51175500  | 0.01455200  |
| C | -0.39244300 | 2.06980700  | 1.39647600  |
| H | 0.13815400  | 1.87033700  | 2.33731000  |
| C | 1.06853000  | 2.22185300  | -0.27437900 |
| N | 0.35447400  | 1.34231200  | 0.33439400  |
| C | 6.99647400  | -1.08392500 | 0.59485500  |
| C | 6.80723300  | -1.45425600 | 1.92311900  |
| C | 5.54136500  | -1.80608700 | 2.39370000  |
| C | 4.44196600  | -1.79598400 | 1.54168500  |
| C | 4.64119800  | -1.42787700 | 0.21690300  |
| C | 5.89965700  | -1.06944000 | -0.25933900 |
| H | 7.98705300  | -0.80723200 | 0.23367200  |
| H | 7.65673600  | -1.46629100 | 2.60434100  |
| H | 5.40984300  | -2.08485500 | 3.43730900  |
| H | 3.44637100  | -2.05614500 | 1.90108900  |
| C | 5.85726200  | -0.72356900 | -1.72408400 |
| H | 6.30900500  | 0.24976000  | -1.95964700 |
| H | 6.38972000  | -1.46967500 | -2.33189000 |
| C | -2.50133500 | 0.81914100  | 2.23858800  |
| C | -1.86230300 | 1.81114600  | 1.50863100  |
| C | -2.58124300 | 2.82546900  | 0.87124100  |
| C | -3.96532600 | 2.86397800  | 0.96484300  |
| C | -4.61377100 | 1.86943700  | 1.69538200  |
| C | -3.89123200 | 0.85284500  | 2.31903600  |
| H | -1.91889800 | 0.05308200  | 2.75133800  |
| H | -4.53498500 | 3.66448500  | 0.49281600  |

|    |             |             |             |
|----|-------------|-------------|-------------|
| H  | -5.69909100 | 1.89143700  | 1.78868500  |
| H  | -4.41673400 | 0.08895300  | 2.89030800  |
| C  | -1.64572400 | 3.78506900  | 0.18337100  |
| H  | -1.53500600 | 3.53832700  | -0.88705200 |
| H  | -0.10713100 | 4.24601000  | 1.68709400  |
| H  | -1.96145000 | 4.83398800  | 0.23919300  |
| H  | 4.14353600  | -1.21360800 | -3.02664500 |
| C  | 0.80738500  | -2.54426500 | 0.55065400  |
| N  | 1.05087600  | -3.68615700 | 0.60370600  |
| Cu | 0.58946800  | -0.67865700 | 0.48097500  |
| C  | 0.99576900  | -0.47883600 | 2.41482300  |
| N  | 1.14580600  | -0.25801900 | 3.55392800  |
| C  | -4.54742400 | -1.13827500 | -0.26147700 |
| C  | -3.95799700 | -0.07182500 | -0.94152200 |
| C  | -2.60244600 | -0.06728700 | -1.23258700 |
| C  | -1.79083500 | -1.15873400 | -0.88831400 |
| C  | -2.38320000 | -2.22444900 | -0.18581100 |
| C  | -3.73203600 | -2.21033400 | 0.11879200  |
| H  | -4.57682700 | 0.77690800  | -1.23591100 |
| H  | -2.17373700 | 0.78350400  | -1.76234300 |
| H  | -1.75793100 | -3.06406000 | 0.11951000  |
| H  | -4.17046900 | -3.04719300 | 0.66468100  |
| C  | -6.01619500 | -1.15672200 | 0.04229900  |
| C  | -0.39344100 | -1.26058700 | -1.32153800 |
| C  | -6.82212800 | -2.11627800 | -0.84485700 |
| H  | -6.39369000 | -3.12641400 | -0.72180800 |
| C  | 0.08221800  | -0.38790500 | -2.44716700 |
| H  | -0.51467900 | -0.62323900 | -3.34428800 |
| H  | -0.02886400 | 0.68583700  | -2.25528300 |
| H  | 1.13044100  | -0.59123100 | -2.69540900 |
| H  | -0.10016700 | -2.29660800 | -1.48587900 |
| H  | -6.17040900 | -1.43998900 | 1.09698100  |
| H  | -6.43467100 | -0.14216300 | -0.07319800 |

|   |             |             |             |
|---|-------------|-------------|-------------|
| C | -6.72128400 | -1.72774700 | -2.31269700 |
| H | -7.10711100 | -0.70738200 | -2.46616300 |
| H | -5.68462200 | -1.75001800 | -2.67215300 |
| H | -7.31327500 | -2.40396900 | -2.94323000 |
| C | -8.27478800 | -2.14584100 | -0.39352800 |
| H | -8.86722500 | -2.84662400 | -0.99616300 |
| H | -8.36805900 | -2.44284200 | 0.65974200  |
| H | -8.73095400 | -1.14988600 | -0.50095700 |

**TS5a6**

|   |             |             |             |
|---|-------------|-------------|-------------|
| C | 3.81523200  | -2.41311500 | 0.47154300  |
| O | 2.84126500  | -2.61134100 | -0.58955200 |
| C | 3.54010700  | -0.95811800 | 0.91519000  |
| H | 3.44953800  | -0.82021700 | 2.00132800  |
| C | 2.01643700  | -1.54361700 | -0.56477700 |
| N | 2.26718900  | -0.61684900 | 0.27196000  |
| C | 0.91816100  | -1.57097200 | -1.55139900 |
| C | 1.17915200  | -2.38757700 | -2.81401900 |
| C | 0.22501300  | -2.90549300 | -1.81840100 |
| H | 2.16196400  | -2.84554900 | -2.87298800 |
| H | 0.79210400  | -1.96738100 | -3.73686400 |
| H | 0.52714900  | -3.73491600 | -1.18218400 |
| H | -0.83961300 | -2.83947500 | -2.03603300 |
| C | -1.27767200 | 0.97938200  | -2.85807800 |
| O | -0.51675800 | -0.24484100 | -2.89989300 |
| C | -0.71297900 | 1.71844700  | -1.63571900 |
| H | 0.05870900  | 2.46857500  | -1.85750700 |
| C | 0.10637400  | -0.34320000 | -1.70845800 |
| N | -0.03720500 | 0.63105100  | -0.89017100 |
| C | 6.72757600  | -0.49025200 | -0.90769400 |
| C | 6.88220100  | 0.89257900  | -0.94713400 |
| C | 5.93773200  | 1.73445500  | -0.35851300 |
| C | 4.82213100  | 1.20725500  | 0.28428400  |



|    |             |             |             |
|----|-------------|-------------|-------------|
| C  | 4.67801200  | -0.17416100 | 0.32140900  |
| C  | 5.61275800  | -1.02122200 | -0.26952800 |
| H  | 7.46618300  | -1.14300800 | -1.37304400 |
| H  | 7.74837700  | 1.32271900  | -1.44764200 |
| H  | 6.06786600  | 2.81367500  | -0.40745200 |
| H  | 4.07009400  | 1.85884600  | 0.73016000  |
| C  | 5.23787600  | -2.46696500 | -0.08093400 |
| H  | 5.27593600  | -3.06051800 | -1.00430500 |
| H  | 5.90184600  | -2.96614400 | 0.64034700  |
| C  | -1.95959600 | 3.32046200  | -0.01941500 |
| C  | -1.91856600 | 2.32908400  | -0.99062500 |
| C  | -3.08595000 | 1.82634500  | -1.56712500 |
| C  | -4.32319000 | 2.32951700  | -1.18716800 |
| C  | -4.37389000 | 3.32125900  | -0.20808500 |
| C  | -3.20456100 | 3.80682500  | 0.37650300  |
| H  | -1.03221200 | 3.71765900  | 0.39555000  |
| H  | -5.23967400 | 1.96702100  | -1.65477500 |
| H  | -5.33682500 | 3.73190800  | 0.09246700  |
| H  | -3.26242900 | 4.59209600  | 1.12816800  |
| C  | -2.76831300 | 0.75361700  | -2.57374700 |
| H  | -2.90107500 | -0.24867600 | -2.12905100 |
| H  | -1.10298400 | 1.49267800  | -3.80816300 |
| H  | -3.38931100 | 0.79322600  | -3.47753900 |
| H  | 3.60700700  | -3.17551500 | 1.23218300  |
| C  | 1.51388100  | 1.23026700  | 2.68146600  |
| N  | 2.17452800  | 1.45767400  | 3.61957900  |
| Cu | 0.88023800  | 1.01565100  | 0.94370300  |
| C  | 1.52976000  | 2.76037100  | 0.25818000  |
| N  | 1.79469900  | 3.78605600  | -0.23958300 |
| C  | -3.74466000 | -1.03826300 | 0.40808200  |
| C  | -2.65213100 | -1.90167900 | 0.28564900  |
| C  | -1.45737900 | -1.64785300 | 0.94270400  |
| C  | -1.31277000 | -0.51049600 | 1.75007300  |

|   |             |             |             |
|---|-------------|-------------|-------------|
| C | -2.40706400 | 0.36084000  | 1.86405500  |
| C | -3.59849400 | 0.09746700  | 1.21062200  |
| H | -2.75723800 | -2.80479600 | -0.32011700 |
| H | -0.62960500 | -2.34976700 | 0.84217300  |
| H | -2.30888900 | 1.25488300  | 2.48170500  |
| H | -4.43484500 | 0.78932100  | 1.31469500  |
| C | -5.05494600 | -1.33014500 | -0.26203500 |
| C | -0.11555900 | -0.27194900 | 2.56924200  |
| C | -6.13633800 | -1.86027500 | 0.69062000  |
| H | -6.26812100 | -1.11348500 | 1.49321300  |
| C | 0.71262400  | -1.46171800 | 2.96269300  |
| H | 0.05815800  | -2.19554300 | 3.45904100  |
| H | 1.17124500  | -1.96263000 | 2.10140700  |
| H | 1.50294600  | -1.17288400 | 3.66069900  |
| H | -0.36633900 | 0.35955400  | 3.42129200  |
| H | -5.43112700 | -0.41119500 | -0.74221600 |
| H | -4.90922000 | -2.06926100 | -1.06895900 |
| C | -7.45453300 | -2.01343000 | -0.05352700 |
| H | -7.35449400 | -2.74929000 | -0.86589300 |
| H | -8.25201200 | -2.36551500 | 0.61362100  |
| H | -7.78222200 | -1.06561900 | -0.50136900 |
| C | -5.71912100 | -3.17904700 | 1.32479900  |
| H | -5.54289000 | -3.93947600 | 0.54752800  |
| H | -4.79663400 | -3.07983600 | 1.91100200  |
| H | -6.50265800 | -3.56318900 | 1.99081100  |

**10b1**

|   |             |            |             |
|---|-------------|------------|-------------|
| C | -0.56131900 | 3.81676500 | -1.64339800 |
| O | -1.69965600 | 3.67379000 | -0.75825600 |
| C | 0.14519200  | 2.44393600 | -1.54245600 |
| H | 0.27006100  | 1.92107600 | -2.50048000 |
| C | -1.70412000 | 2.40654900 | -0.30834100 |
| N | -0.74945500 | 1.65116000 | -0.69323100 |

|   |             |             |             |
|---|-------------|-------------|-------------|
| C | -2.79120800 | 2.07359400  | 0.63011400  |
| C | -2.86620900 | 2.96908200  | 1.86761400  |
| C | -3.90882100 | 3.08538600  | 0.83084900  |
| H | -2.10238500 | 3.74057800  | 1.92883700  |
| H | -3.08685000 | 2.45485000  | 2.79878800  |
| H | -3.89535200 | 3.94667400  | 0.16911400  |
| H | -4.88801800 | 2.66029100  | 1.03425200  |
| C | -4.12091000 | -1.01621300 | 1.94474100  |
| O | -4.06992100 | 0.41704000  | 1.75747100  |
| C | -3.27201800 | -1.53502000 | 0.76241900  |
| H | -2.49962400 | -2.25485300 | 1.07503600  |
| C | -3.12975100 | 0.65045900  | 0.81694000  |
| N | -2.62109300 | -0.34807300 | 0.20862000  |
| C | 2.69539800  | 4.58168500  | 0.08231900  |
| C | 3.67982100  | 3.68084600  | 0.47772900  |
| C | 3.54957200  | 2.31907300  | 0.20556900  |
| C | 2.42999300  | 1.83794500  | -0.46554700 |
| C | 1.44830100  | 2.74178900  | -0.85368300 |
| C | 1.57444900  | 4.10282100  | -0.58567000 |
| H | 2.80274400  | 5.64517900  | 0.29534200  |
| H | 4.56104600  | 4.04311100  | 1.00474400  |
| H | 4.32610600  | 1.62279800  | 0.52099400  |
| H | 2.32625900  | 0.77251400  | -0.68400900 |
| C | 0.40848000  | 4.88342600  | -1.12923600 |
| H | -0.08307400 | 5.51571700  | -0.37732800 |
| H | 0.71621500  | 5.55171900  | -1.94632500 |
| C | -4.05518100 | -2.57178500 | -1.48361500 |
| C | -4.27755300 | -2.11949800 | -0.18902200 |
| C | -5.55599100 | -2.10526400 | 0.36429600  |
| C | -6.63798200 | -2.57291800 | -0.37291100 |
| C | -6.42019800 | -3.04428700 | -1.66431200 |
| C | -5.13954600 | -3.04027200 | -2.21870200 |
| H | -3.05554800 | -2.53104900 | -1.91878400 |

|    |             |             |             |
|----|-------------|-------------|-------------|
| H  | -7.64283400 | -2.56520600 | 0.04936400  |
| H  | -7.25998000 | -3.41100500 | -2.25252300 |
| H  | -4.98998600 | -3.39703800 | -3.23615300 |
| C  | -5.54089400 | -1.55261600 | 1.76506600  |
| H  | -6.28103500 | -0.75807700 | 1.93011200  |
| H  | -3.69033000 | -1.21618900 | 2.93236200  |
| H  | -5.74901800 | -2.33423200 | 2.51030600  |
| H  | -0.97001100 | 4.04257100  | -2.63370700 |
| C  | -0.22101900 | 0.06581500  | 1.77902000  |
| N  | -0.34895700 | 0.28111800  | 2.92180900  |
| Cu | -0.25371900 | -0.30680800 | -0.11465900 |
| C  | -0.04551800 | -0.79825300 | -1.95349900 |
| N  | 0.09544000  | -1.00698300 | -3.09527400 |
| C  | 4.85341000  | -1.33061900 | 0.08012200  |
| C  | 4.15161900  | -1.83186800 | -1.02257400 |
| C  | 2.79456600  | -2.09684800 | -0.95062200 |
| C  | 2.08763900  | -1.87021800 | 0.24225700  |
| C  | 2.78907200  | -1.35806400 | 1.34626300  |
| C  | 4.14841600  | -1.10384600 | 1.26573500  |
| H  | 4.68411300  | -1.99947400 | -1.95981400 |
| H  | 2.26533300  | -2.44238600 | -1.83653300 |
| H  | 2.24236300  | -1.13700700 | 2.26333600  |
| H  | 4.67816500  | -0.70860100 | 2.13392200  |
| C  | 6.32539500  | -1.05964900 | -0.01811200 |
| C  | 0.66403400  | -2.16836700 | 0.38543800  |
| C  | 7.19234400  | -2.32665800 | 0.03605100  |
| H  | 6.86470400  | -2.99010400 | -0.78367900 |
| C  | 0.01775400  | -3.26932400 | -0.40079700 |
| H  | 0.27605600  | -3.26831600 | -1.46207400 |
| H  | 0.33960300  | -4.22686400 | 0.04267500  |
| H  | -1.07589300 | -3.22869200 | -0.32424900 |
| H  | 0.34928300  | -2.17796400 | 1.42984400  |
| H  | 6.63846200  | -0.38809700 | 0.79966400  |

|   |            |             |             |
|---|------------|-------------|-------------|
| H | 6.53877400 | -0.52760500 | -0.95918200 |
| C | 7.01353600 | -3.06597600 | 1.35394800  |
| H | 5.97470200 | -3.38303600 | 1.51084400  |
| H | 7.64945700 | -3.95994300 | 1.39516200  |
| H | 7.29675600 | -2.41822600 | 2.19851500  |
| C | 8.65358800 | -1.96484900 | -0.18492000 |
| H | 9.29196100 | -2.85798900 | -0.17820000 |
| H | 8.80510600 | -1.44743000 | -1.14172000 |
| H | 9.00956400 | -1.29800200 | 0.61502000  |

### TS5b1

|   |             |             |             |
|---|-------------|-------------|-------------|
| C | -0.64210700 | 3.86336900  | -1.63992400 |
| O | -1.76718600 | 3.69847400  | -0.74161600 |
| C | 0.07131600  | 2.48982800  | -1.57944100 |
| H | 0.17024300  | 1.98133100  | -2.54841400 |
| C | -1.74537600 | 2.42686600  | -0.30249900 |
| N | -0.79263300 | 1.68460400  | -0.71474200 |
| C | -2.79852900 | 2.06509200  | 0.66506300  |
| C | -2.82016300 | 2.91908500  | 1.93426000  |
| C | -3.90491800 | 3.06868200  | 0.94591900  |
| H | -2.05262500 | 3.68763800  | 1.98777000  |
| H | -2.99878500 | 2.37321100  | 2.85643600  |
| H | -3.91828100 | 3.95097100  | 0.31220100  |
| H | -4.87551400 | 2.63763700  | 1.17656700  |
| C | -4.04881700 | -1.07230000 | 1.94806800  |
| O | -4.03334000 | 0.36638500  | 1.78252900  |
| C | -3.23728400 | -1.55301100 | 0.72428900  |
| H | -2.44483800 | -2.27164600 | 0.98674500  |
| C | -3.12422900 | 0.63507200  | 0.82489700  |
| N | -2.62042900 | -0.34415200 | 0.17872900  |
| C | 2.65785400  | 4.60491400  | 0.01710500  |
| C | 3.65766900  | 3.70074900  | 0.36328400  |
| C | 3.52641100  | 2.34485100  | 0.06355800  |

|    |             |             |             |
|----|-------------|-------------|-------------|
| C  | 2.39047900  | 1.87351000  | -0.58659600 |
| C  | 1.39377600  | 2.78056100  | -0.92574300 |
| C  | 1.52023700  | 4.13548100  | -0.62936400 |
| H  | 2.76604300  | 5.66372700  | 0.25193200  |
| H  | 4.55172800  | 4.05580600  | 0.87330400  |
| H  | 4.31501300  | 1.64587600  | 0.34108700  |
| H  | 2.28653100  | 0.81285600  | -0.82637300 |
| C  | 0.33374900  | 4.92184000  | -1.11798300 |
| H  | -0.14277700 | 5.52475500  | -0.33296400 |
| H  | 0.61427900  | 5.61953800  | -1.92016800 |
| C  | -4.09066700 | -2.54245100 | -1.51662500 |
| C  | -4.27073300 | -2.12552200 | -0.20396400 |
| C  | -5.52737200 | -2.14442200 | 0.39683100  |
| C  | -6.62952400 | -2.60861400 | -0.31232800 |
| C  | -6.45387000 | -3.04314800 | -1.62300800 |
| C  | -5.19483000 | -3.00721100 | -2.22395700 |
| H  | -3.10696000 | -2.47739900 | -1.98444000 |
| H  | -7.61791800 | -2.62684800 | 0.14684400  |
| H  | -7.31004500 | -3.40677400 | -2.18908800 |
| H  | -5.07869300 | -3.33688500 | -3.25489000 |
| C  | -5.46501500 | -1.62974700 | 1.81079100  |
| H  | -6.21222900 | -0.85479500 | 2.02828700  |
| H  | -3.57515800 | -1.27780500 | 2.91402600  |
| H  | -5.62778800 | -2.43571500 | 2.54122200  |
| H  | -1.06566700 | 4.11019600  | -2.61885700 |
| C  | -0.27921200 | 0.02616800  | 1.96647800  |
| N  | -0.45948900 | 0.10301600  | 3.12110800  |
| Cu | -0.32616700 | -0.22164300 | 0.00717700  |
| C  | 0.02099800  | -0.94476300 | -1.69944900 |
| N  | 0.12990400  | -1.03380000 | -2.86193400 |
| C  | 4.90297000  | -1.31467100 | 0.04474400  |
| C  | 4.32679900  | -1.82341400 | -1.12491700 |
| C  | 2.97446700  | -2.11545600 | -1.18895200 |

|   |             |             |             |
|---|-------------|-------------|-------------|
| C | 2.15068700  | -1.90469900 | -0.07438100 |
| C | 2.72121500  | -1.38693300 | 1.09661400  |
| C | 4.07886400  | -1.10918500 | 1.15364000  |
| H | 4.95452200  | -1.97579400 | -2.00408200 |
| H | 2.54184800  | -2.47277600 | -2.12201700 |
| H | 2.08189000  | -1.17727200 | 1.95501600  |
| H | 4.50965200  | -0.70872600 | 2.07247300  |
| C | 6.37196100  | -1.01292800 | 0.09514100  |
| C | 0.71819900  | -2.22678300 | -0.08887100 |
| C | 7.25740600  | -2.26237300 | 0.21056300  |
| H | 7.02623600  | -2.91609100 | -0.64904500 |
| C | 0.21163700  | -3.43821200 | -0.81772000 |
| H | 0.57572400  | -3.51978700 | -1.84482900 |
| H | 0.54907300  | -4.32034700 | -0.25066900 |
| H | -0.88446000 | -3.45560500 | -0.84153500 |
| H | 0.28031700  | -2.16964200 | 0.91101600  |
| H | 6.58899000  | -0.35156600 | 0.95134200  |
| H | 6.66392200  | -0.45743200 | -0.81082600 |
| C | 6.96774900  | -3.03147400 | 1.49125400  |
| H | 5.92581000  | -3.37249100 | 1.54029100  |
| H | 7.61626100  | -3.91298200 | 1.57847600  |
| H | 7.15274300  | -2.39508600 | 2.37089700  |
| C | 8.72482500  | -1.86655500 | 0.13962000  |
| H | 9.37929100  | -2.74637800 | 0.19275000  |
| H | 8.95699200  | -1.32723900 | -0.78854800 |
| H | 8.98649300  | -1.20854700 | 0.98210900  |

**10b2**

|   |             |            |             |
|---|-------------|------------|-------------|
| C | -3.06320700 | 1.36708300 | 0.31898300  |
| O | -2.41713800 | 0.66957600 | 1.41571600  |
| C | -1.86828000 | 1.80961400 | -0.55948500 |
| H | -1.96211700 | 1.53796600 | -1.62035300 |
| C | -1.10920400 | 0.57419900 | 1.09518900  |

|   |             |             |             |
|---|-------------|-------------|-------------|
| N | -0.71245400 | 1.11276800  | 0.01455000  |
| C | -0.27223200 | -0.11332500 | 2.09940600  |
| C | -0.67333700 | 0.13391800  | 3.56026900  |
| C | -0.92108900 | -1.18754800 | 2.96286900  |
| H | -1.51652700 | 0.80588400  | 3.69162000  |
| H | 0.14312400  | 0.24938200  | 4.26605200  |
| H | -1.93969800 | -1.44777500 | 2.68483600  |
| H | -0.27793800 | -2.01841100 | 3.24678400  |
| C | 3.26769400  | -0.64701600 | 2.51737200  |
| O | 1.89280300  | -0.56799100 | 2.94174300  |
| C | 3.28062100  | 0.12991900  | 1.20171700  |
| H | 3.50468200  | 1.20256200  | 1.28229400  |
| C | 1.17953600  | -0.21649100 | 1.85268400  |
| N | 1.85289000  | 0.03313500  | 0.78647300  |
| C | -2.89401000 | 5.08596300  | 0.82916100  |
| C | -1.90659100 | 5.95702500  | 0.37756400  |
| C | -0.86232500 | 5.49734800  | -0.42555200 |
| C | -0.78896000 | 4.15769300  | -0.79233500 |
| C | -1.77734500 | 3.29422200  | -0.33606700 |
| C | -2.82089800 | 3.74521700  | 0.46902600  |
| H | -3.70695500 | 5.44948200  | 1.45801400  |
| H | -1.94766100 | 7.00864300  | 0.65748100  |
| H | -0.09192100 | 6.18819500  | -0.76210000 |
| H | 0.03152200  | 3.78836800  | -1.40683800 |
| C | -3.76969100 | 2.62869600  | 0.81399700  |
| H | -3.99300600 | 2.55308400  | 1.88695700  |
| H | -4.73602200 | 2.74741300  | 0.30165600  |
| C | 4.88889400  | -0.17748200 | -0.80517300 |
| C | 4.25863900  | -0.61243700 | 0.35213300  |
| C | 4.51153100  | -1.87220700 | 0.89762400  |
| C | 5.38905600  | -2.73910100 | 0.26035900  |
| C | 6.01029800  | -2.31921700 | -0.91544900 |
| C | 5.77116300  | -1.04911000 | -1.44015400 |



|    |             |             |             |
|----|-------------|-------------|-------------|
| H  | 4.69029700  | 0.82147300  | -1.19541900 |
| H  | 5.59907800  | -3.72574900 | 0.67261900  |
| H  | 6.70522800  | -2.98694900 | -1.42205700 |
| H  | 6.28248200  | -0.73485500 | -2.34804400 |
| C  | 3.71843800  | -2.07425800 | 2.16399800  |
| H  | 2.82966700  | -2.70407800 | 1.98923200  |
| H  | 3.87236700  | -0.19715600 | 3.30958900  |
| H  | 4.28991600  | -2.55254700 | 2.96905100  |
| H  | -3.73325800 | 0.64021700  | -0.15770300 |
| C  | 0.81519000  | 1.21720200  | -2.76448700 |
| N  | 0.38481000  | 1.63536300  | -3.76746500 |
| Cu | 1.29511400  | 0.71774100  | -1.03384100 |
| C  | 2.27948800  | 2.41735500  | -0.65386500 |
| N  | 2.98652800  | 3.29649800  | -0.34245300 |
| C  | -3.04144300 | -2.24332500 | -0.49151200 |
| C  | -2.89244100 | -1.48424700 | -1.65676100 |
| C  | -1.63672700 | -1.15515300 | -2.13978700 |
| C  | -0.47391300 | -1.56840600 | -1.46961000 |
| C  | -0.62332800 | -2.36342800 | -0.32391300 |
| C  | -1.88407500 | -2.69939400 | 0.14528700  |
| H  | -3.78421200 | -1.14335700 | -2.18671000 |
| H  | -1.53220800 | -0.54191600 | -3.03632500 |
| H  | 0.25901900  | -2.71999100 | 0.20874700  |
| H  | -1.97976300 | -3.32041800 | 1.03855500  |
| C  | -4.39514000 | -2.57703100 | 0.06329600  |
| C  | 0.82884800  | -1.18999300 | -2.00800300 |
| C  | -4.82080300 | -4.03600600 | -0.15169700 |
| H  | -4.05075900 | -4.68150100 | 0.30680900  |
| C  | 2.04271400  | -2.01182700 | -1.69119500 |
| H  | 2.20266000  | -2.17960500 | -0.62105900 |
| H  | 1.92336400  | -2.99835600 | -2.17102000 |
| H  | 2.95389800  | -1.55998700 | -2.09902600 |
| H  | 0.76987700  | -0.97637600 | -3.07343100 |

|   |             |             |             |
|---|-------------|-------------|-------------|
| H | -5.15707000 | -1.92241300 | -0.39384700 |
| H | -4.40872900 | -2.35696000 | 1.14479700  |
| C | -6.14998400 | -4.29793200 | 0.54063900  |
| H | -6.46312700 | -5.34345100 | 0.42284200  |
| H | -6.10034100 | -4.07834400 | 1.61571100  |
| H | -6.93996700 | -3.66587500 | 0.10753700  |
| C | -4.90782800 | -4.37095800 | -1.63359000 |
| H | -5.64291800 | -3.71919100 | -2.13137300 |
| H | -3.94491200 | -4.23707600 | -2.14278500 |
| H | -5.22968800 | -5.40922400 | -1.78676100 |

**TS5b2**

|   |             |             |             |
|---|-------------|-------------|-------------|
| C | -2.51104800 | -2.78866900 | -0.19838300 |
| O | -1.60482900 | -2.56898500 | 0.91396000  |
| C | -2.68260400 | -1.36830200 | -0.78368900 |
| H | -2.55092800 | -1.30059700 | -1.87269700 |
| C | -1.15874900 | -1.30022600 | 0.80487500  |
| N | -1.64481400 | -0.57365300 | -0.11954600 |
| C | -0.16816100 | -0.89723500 | 1.82068200  |
| C | -0.34910400 | -1.53339000 | 3.20333700  |
| C | 0.77563200  | -1.96760800 | 2.35981500  |
| H | -1.21041300 | -2.18881000 | 3.29557000  |
| H | -0.14977900 | -0.88636500 | 4.05198100  |
| H | 0.71832900  | -2.93293300 | 1.86197300  |
| H | 1.77747900  | -1.62220400 | 2.60798600  |
| C | 1.48870300  | 2.16973800  | 2.70025300  |
| O | 0.98850800  | 0.84047400  | 2.93492400  |
| C | 0.62123700  | 2.68259400  | 1.54902800  |
| H | -0.29100000 | 3.22356800  | 1.83558900  |
| C | 0.32727200  | 0.49298700  | 1.81092200  |
| N | 0.18545500  | 1.40698600  | 0.92076300  |
| C | -5.98348200 | -1.80695300 | 0.83302900  |
| C | -6.57802600 | -0.55445200 | 0.70866800  |

|    |             |             |             |
|----|-------------|-------------|-------------|
| C  | -5.91348100 | 0.49135100  | 0.06673300  |
| C  | -4.64165400 | 0.30191900  | -0.46426600 |
| C  | -4.05680700 | -0.95202100 | -0.33707800 |
| C  | -4.71188800 | -1.99973800 | 0.30602000  |
| H  | -6.50570500 | -2.61943000 | 1.33846200  |
| H  | -7.57211400 | -0.38758400 | 1.12074300  |
| H  | -6.38920400 | 1.46670200  | -0.01424000 |
| H  | -4.10797100 | 1.11552900  | -0.95576200 |
| C  | -3.87888500 | -3.25365600 | 0.29725400  |
| H  | -3.79388800 | -3.73800400 | 1.27946100  |
| H  | -4.29168900 | -4.00747200 | -0.38955100 |
| C  | 1.25387900  | 4.47987700  | -0.21171700 |
| C  | 1.56182300  | 3.50802400  | 0.73087900  |
| C  | 2.88350700  | 3.20357900  | 1.06594200  |
| C  | 3.92913900  | 3.84468500  | 0.41439000  |
| C  | 3.62867500  | 4.80352600  | -0.55297900 |
| C  | 2.30635900  | 5.12815900  | -0.85481900 |
| H  | 0.21133200  | 4.70979700  | -0.43653400 |
| H  | 4.96577300  | 3.61985800  | 0.66460600  |
| H  | 4.43906300  | 5.31943900  | -1.06552500 |
| H  | 2.09494800  | 5.89553700  | -1.59712300 |
| C  | 2.93240500  | 2.17578100  | 2.16718400  |
| H  | 3.17382400  | 1.17109500  | 1.78110700  |
| H  | 1.37655700  | 2.72634800  | 3.63467100  |
| H  | 3.67309100  | 2.40420200  | 2.94362900  |
| H  | -2.01545300 | -3.50458400 | -0.86603100 |
| C  | -1.53022400 | 1.17533600  | -2.57443800 |
| N  | -2.24388100 | 1.01767000  | -3.48821600 |
| Cu | -0.85660700 | 1.39340500  | -0.84799000 |
| C  | -1.96443300 | 2.93249200  | -0.25239700 |
| N  | -2.41711900 | 3.91498200  | 0.19542300  |
| C  | 2.51462600  | -2.63821000 | -0.36952100 |
| C  | 1.39550700  | -2.82065600 | -1.18765400 |

|   |             |             |             |
|---|-------------|-------------|-------------|
| C | 0.78245500  | -1.74296000 | -1.80702000 |
| C | 1.25250700  | -0.43393200 | -1.62073400 |
| C | 2.36399200  | -0.24868900 | -0.78360600 |
| C | 2.98500600  | -1.33479300 | -0.18376500 |
| H | 1.01565100  | -3.83080100 | -1.35155300 |
| H | -0.07794100 | -1.90070200 | -2.46052400 |
| H | 2.76214500  | 0.75404900  | -0.62504000 |
| H | 3.86419000  | -1.17426200 | 0.44494500  |
| C | 3.22561000  | -3.80014900 | 0.26069600  |
| C | 0.64437100  | 0.66073900  | -2.38543500 |
| C | 4.51469900  | -4.20917800 | -0.46787700 |
| H | 5.17266200  | -3.32276900 | -0.50206800 |
| C | 1.38773100  | 1.94996800  | -2.57250300 |
| H | 1.73273000  | 2.39494600  | -1.63406700 |
| H | 2.27681600  | 1.75846200  | -3.19577000 |
| H | 0.76599600  | 2.69041100  | -3.08752200 |
| H | 0.24739400  | 0.28258100  | -3.32533600 |
| H | 3.48013900  | -3.55695800 | 1.30598300  |
| H | 2.55470700  | -4.67564200 | 0.29876400  |
| C | 4.23161400  | -4.65267900 | -1.89554900 |
| H | 3.54804500  | -5.51631700 | -1.90080000 |
| H | 3.76810600  | -3.85571000 | -2.49067400 |
| H | 5.15484900  | -4.95972200 | -2.40379800 |
| C | 5.22106300  | -5.31089900 | 0.30823900  |
| H | 6.16219500  | -5.60086300 | -0.17665200 |
| H | 5.45156500  | -5.00234300 | 1.33684600  |
| H | 4.58762400  | -6.20916200 | 0.36352300  |

**10b3**

|   |             |             |             |
|---|-------------|-------------|-------------|
| C | -2.38521400 | -2.96154600 | -0.33607000 |
| O | -1.47341600 | -2.73278700 | 0.76885500  |
| C | -2.63747500 | -1.53195200 | -0.87618800 |
| H | -2.49315900 | -1.42203900 | -1.96158200 |

|   |             |             |             |
|---|-------------|-------------|-------------|
| C | -1.11376800 | -1.43336900 | 0.71263300  |
| N | -1.65397900 | -0.70165500 | -0.17593100 |
| C | -0.13620600 | -1.01244200 | 1.73499000  |
| C | -0.27268300 | -1.69318900 | 3.10178400  |
| C | 0.86371200  | -2.04977500 | 2.23794800  |
| H | -1.10140100 | -2.39106100 | 3.18166700  |
| H | -0.09949800 | -1.06025800 | 3.96671200  |
| H | 0.84697900  | -3.00282400 | 1.71481900  |
| H | 1.85097200  | -1.66386900 | 2.48429700  |
| C | 1.39042100  | 2.10815100  | 2.68868500  |
| O | 0.97965000  | 0.73887700  | 2.87075500  |
| C | 0.47574500  | 2.61134200  | 1.56904400  |
| H | -0.45133200 | 3.10303300  | 1.89573600  |
| C | 0.29416500  | 0.39812600  | 1.76230700  |
| N | 0.07793100  | 1.33980900  | 0.91639600  |
| C | -5.91153300 | -2.21125800 | 0.71492700  |
| C | -6.58544900 | -0.99810000 | 0.60887800  |
| C | -5.99018600 | 0.09683200  | -0.01825100 |
| C | -4.70906700 | -0.00273800 | -0.55045900 |
| C | -4.04118700 | -1.21567000 | -0.43655900 |
| C | -4.62896000 | -2.31320200 | 0.18860000  |
| H | -6.38045800 | -3.06377000 | 1.20647100  |
| H | -7.58786300 | -0.90157300 | 1.02316500  |
| H | -6.52576700 | 1.04161100  | -0.08446700 |
| H | -4.23379600 | 0.85197300  | -1.03091100 |
| C | -3.72017200 | -3.51253500 | 0.16252500  |
| H | -3.59797300 | -3.99833300 | 1.14008600  |
| H | -4.09141700 | -4.28533200 | -0.52680900 |
| C | 0.98071900  | 4.43064500  | -0.20622600 |
| C | 1.35690600  | 3.48818700  | 0.74034900  |
| C | 2.69806000  | 3.26368200  | 1.05847200  |
| C | 3.69405300  | 3.96812100  | 0.39433700  |
| C | 3.32478700  | 4.90428400  | -0.57139300 |

|    |             |             |             |
|----|-------------|-------------|-------------|
| C  | 1.98231800  | 5.14245000  | -0.86343400 |
| H  | -0.07404200 | 4.60138200  | -0.42517000 |
| H  | 4.74540200  | 3.80743800  | 0.63191600  |
| H  | 4.09599800  | 5.46846900  | -1.09313100 |
| H  | 1.71530500  | 5.88853600  | -1.60928200 |
| C  | 2.82653800  | 2.23413300  | 2.15181800  |
| H  | 3.14695600  | 1.25583300  | 1.75746400  |
| H  | 1.24714000  | 2.61378300  | 3.64737400  |
| H  | 3.54682900  | 2.51568700  | 2.93007300  |
| H  | -1.86652500 | -3.63240000 | -1.03225100 |
| C  | -1.90091100 | 1.65414800  | -2.38932000 |
| N  | -2.53271300 | 1.75562400  | -3.36656900 |
| Cu | -1.01568300 | 1.38354000  | -0.76602500 |
| C  | -2.35428400 | 2.47023000  | 0.22869300  |
| N  | -3.00974900 | 3.16505600  | 0.90395000  |
| C  | 2.90366200  | -2.33651200 | -0.35692900 |
| C  | 1.74346600  | -2.65487300 | -1.06749600 |
| C  | 0.95717900  | -1.66082300 | -1.62882300 |
| C  | 1.29093000  | -0.30305600 | -1.50233700 |
| C  | 2.46076300  | 0.01302900  | -0.79076500 |
| C  | 3.24859600  | -0.98597500 | -0.23777800 |
| H  | 1.46107000  | -3.70326100 | -1.18443800 |
| H  | 0.06444800  | -1.92768000 | -2.19693200 |
| H  | 2.75979400  | 1.05676500  | -0.68226100 |
| H  | 4.16077400  | -0.71876200 | 0.30126500  |
| C  | 3.77804100  | -3.40131400 | 0.23787000  |
| C  | 0.47033500  | 0.70492500  | -2.17688100 |
| C  | 5.04762600  | -3.69232200 | -0.57604100 |
| H  | 5.60487200  | -2.74385800 | -0.67447400 |
| C  | 1.14660600  | 1.95883300  | -2.65987200 |
| H  | 1.60936300  | 2.54189800  | -1.85441500 |
| H  | 1.95126300  | 1.68521800  | -3.36301200 |
| H  | 0.44031000  | 2.61039500  | -3.18419400 |

|   |             |             |             |
|---|-------------|-------------|-------------|
| H | -0.15303900 | 0.24397400  | -2.94484200 |
| H | 4.07691400  | -3.10684300 | 1.25795600  |
| H | 3.20761800  | -4.34071400 | 0.34021200  |
| C | 4.70969400  | -4.19776700 | -1.97088000 |
| H | 4.12045900  | -5.12637000 | -1.90995000 |
| H | 4.12425200  | -3.46724600 | -2.54338700 |
| H | 5.62043900  | -4.42170700 | -2.54127600 |
| C | 5.92009800  | -4.69546800 | 0.16391300  |
| H | 6.84845300  | -4.89934500 | -0.38519700 |
| H | 6.19155800  | -4.33890100 | 1.16669300  |
| H | 5.38967300  | -5.65245500 | 0.28256000  |

**TS5b3**

|   |             |             |             |
|---|-------------|-------------|-------------|
| C | 2.83293200  | 2.67060200  | -0.45938500 |
| O | 1.87986700  | 2.64018500  | 0.63427900  |
| C | 2.92984100  | 1.18276800  | -0.87264600 |
| H | 2.79976300  | 0.99563100  | -1.94831900 |
| C | 1.37868500  | 1.38818300  | 0.68012100  |
| N | 1.84576500  | 0.52740500  | -0.13288900 |
| C | 0.35519600  | 1.16494900  | 1.71708600  |
| C | 0.56147000  | 1.92600800  | 3.02861100  |
| C | -0.52105300 | 2.34623900  | 2.12308900  |
| H | 1.46327400  | 2.53034000  | 3.07005700  |
| H | 0.30880900  | 1.38605300  | 3.93594800  |
| H | -0.39272500 | 3.25097400  | 1.53410100  |
| H | -1.54697800 | 2.09507800  | 2.38578400  |
| C | -1.62734700 | -1.61878500 | 2.83026900  |
| O | -0.96103600 | -0.35046100 | 2.96398800  |
| C | -0.87425100 | -2.30493900 | 1.68236600  |
| H | -0.07700000 | -2.99968900 | 1.98047300  |
| C | -0.26225100 | -0.17123400 | 1.82435400  |
| N | -0.22125500 | -1.15778600 | 1.00707400  |
| C | 6.23144200  | 1.61942400  | 0.74395000  |

|    |             |             |             |
|----|-------------|-------------|-------------|
| C  | 6.76244700  | 0.33292600  | 0.75712100  |
| C  | 6.05308100  | -0.73812400 | 0.21223900  |
| C  | 4.79884100  | -0.54110900 | -0.35634300 |
| C  | 4.27688500  | 0.74679700  | -0.36572900 |
| C  | 4.97753800  | 1.82045700  | 0.17885500  |
| H  | 6.78878000  | 2.45244200  | 1.17252500  |
| H  | 7.74196000  | 0.15970200  | 1.20023800  |
| H  | 6.48054300  | -1.73856700 | 0.23620500  |
| H  | 4.23326000  | -1.37139200 | -0.77908700 |
| C  | 4.21326700  | 3.10829900  | 0.02844900  |
| H  | 4.13078600  | 3.68694600  | 0.95849100  |
| H  | 4.68279800  | 3.77202500  | -0.71260900 |
| C  | -1.81835200 | -3.93099600 | -0.10360500 |
| C  | -1.95374500 | -2.95824400 | 0.87719200  |
| C  | -3.20722300 | -2.47276100 | 1.25385100  |
| C  | -4.35219800 | -2.93442700 | 0.61765700  |
| C  | -4.22235900 | -3.89061900 | -0.38919700 |
| C  | -2.96947700 | -4.39185000 | -0.74145400 |
| H  | -0.83077700 | -4.32301100 | -0.35199100 |
| H  | -5.33714300 | -2.56603400 | 0.90492500  |
| H  | -5.11200100 | -4.26453600 | -0.89330900 |
| H  | -2.89060900 | -5.15581100 | -1.51291200 |
| C  | -3.08315600 | -1.46050600 | 2.36037900  |
| H  | -3.22649100 | -0.43279600 | 1.98449200  |
| H  | -1.54165600 | -2.12938700 | 3.79332500  |
| H  | -3.80959100 | -1.60947700 | 3.16928500  |
| H  | 2.40842400  | 3.33508200  | -1.22210200 |
| C  | 1.82261300  | -1.56336000 | -2.32086300 |
| N  | 2.63074400  | -1.63637400 | -3.16392800 |
| Cu | 0.95577600  | -1.45794600 | -0.67204700 |
| C  | 1.80502600  | -3.02917800 | 0.19556900  |
| N  | 2.08697600  | -4.00020500 | 0.78547700  |
| C  | -2.72430600 | 2.13808200  | -0.48151200 |



|   |             |             |             |
|---|-------------|-------------|-------------|
| C | -1.51614300 | 2.51423600  | -1.07573200 |
| C | -0.71078000 | 1.57819700  | -1.70540100 |
| C | -1.07337400 | 0.22356600  | -1.75609800 |
| C | -2.29147900 | -0.15198500 | -1.16782700 |
| C | -3.09774500 | 0.79136500  | -0.55064500 |
| H | -1.21191800 | 3.56280500  | -1.05041700 |
| H | 0.21929300  | 1.89080700  | -2.18310900 |
| H | -2.61077400 | -1.19381800 | -1.19335700 |
| H | -4.04972200 | 0.47819800  | -0.11472200 |
| C | -3.62567700 | 3.14223500  | 0.17549300  |
| C | -0.23552100 | -0.72167400 | -2.50226600 |
| C | -4.83647000 | 3.54563400  | -0.67902400 |
| H | -5.39510200 | 2.62430200  | -0.92113700 |
| C | -0.86431700 | -1.97206300 | -3.04883800 |
| H | -1.20151500 | -2.65798300 | -2.26168100 |
| H | -1.74972300 | -1.70159300 | -3.64626900 |
| H | -0.15948600 | -2.51285000 | -3.68631500 |
| H | 0.37931200  | -0.19411500 | -3.23104600 |
| H | -3.99435300 | 2.73521500  | 1.13253600  |
| H | -3.05572700 | 4.05444300  | 0.42340400  |
| C | -4.40313800 | 4.20096000  | -1.98208300 |
| H | -3.81025900 | 5.10645400  | -1.77768600 |
| H | -3.78872600 | 3.53032500  | -2.59602400 |
| H | -5.27253600 | 4.50381200  | -2.57986400 |
| C | -5.74572600 | 4.47249600  | 0.11423400  |
| H | -6.63433700 | 4.75322700  | -0.46581700 |
| H | -6.08541800 | 4.00847500  | 1.05001100  |
| H | -5.21524200 | 5.40067400  | 0.37563200  |

**10b4**

|   |            |             |             |
|---|------------|-------------|-------------|
| C | 4.62477500 | -0.95375500 | -1.85519200 |
| O | 4.53021200 | 0.45565400  | -1.54847500 |
| C | 3.46062600 | -1.54525700 | -1.03115100 |

|   |             |             |             |
|---|-------------|-------------|-------------|
| H | 2.84965000  | -2.26037000 | -1.60059600 |
| C | 3.34145700  | 0.64138900  | -0.92843000 |
| N | 2.64259300  | -0.38941500 | -0.65408000 |
| C | 2.99686800  | 2.05570700  | -0.68356200 |
| C | 4.09568800  | 3.09636200  | -0.86096000 |
| C | 3.06409300  | 2.97884200  | -1.90467200 |
| H | 5.08601500  | 2.69793400  | -1.05993700 |
| H | 4.05276000  | 3.94352900  | -0.18262900 |
| H | 3.30857600  | 2.48449700  | -2.84151000 |
| H | 2.27458100  | 3.72359300  | -1.96846900 |
| C | 0.57567400  | 3.79087300  | 1.31025200  |
| O | 1.84029800  | 3.66794800  | 0.62706500  |
| C | 0.25835200  | 2.35126500  | 1.75086300  |
| H | 0.55583800  | 2.09799400  | 2.77893300  |
| C | 1.93820000  | 2.36610800  | 0.29086800  |
| N | 1.09932300  | 1.56304200  | 0.83045400  |
| C | 6.34677000  | -2.65064100 | 1.00979100  |
| C | 5.76068600  | -3.16645000 | 2.16205500  |
| C | 4.37392800  | -3.17189300 | 2.31423200  |
| C | 3.54900100  | -2.67040500 | 1.31202300  |
| C | 4.14104000  | -2.17059300 | 0.15822500  |
| C | 5.52645300  | -2.14792300 | 0.00677700  |
| H | 7.43120400  | -2.63434100 | 0.90058200  |
| H | 6.39176200  | -3.55955400 | 2.95773000  |
| H | 3.93046600  | -3.56055500 | 3.22901800  |
| H | 2.46696200  | -2.63809400 | 1.44742900  |
| C | 5.92336700  | -1.54559200 | -1.31388700 |
| H | 6.70031900  | -0.77381500 | -1.23097900 |
| H | 6.30895900  | -2.30725000 | -2.00789700 |
| C | -2.08543900 | 1.25416100  | 2.02153100  |
| C | -1.21966600 | 2.22214500  | 1.52726500  |
| C | -1.68733500 | 3.28760300  | 0.75690500  |
| C | -3.03991100 | 3.39526300  | 0.46322200  |

|    |             |             |             |
|----|-------------|-------------|-------------|
| C  | -3.91380100 | 2.43153300  | 0.96147400  |
| C  | -3.44273700 | 1.37313300  | 1.73614300  |
| H  | -1.70666700 | 0.42072700  | 2.61381100  |
| H  | -3.41325200 | 4.22403600  | -0.13764700 |
| H  | -4.97964900 | 2.50733700  | 0.74602400  |
| H  | -4.14023400 | 0.62922600  | 2.11854800  |
| C  | -0.55780400 | 4.19411500  | 0.35343500  |
| H  | -0.24795300 | 3.98081000  | -0.68315300 |
| H  | 0.72108600  | 4.49753300  | 2.13200900  |
| H  | -0.80504200 | 5.26160500  | 0.40866100  |
| H  | 4.51453800  | -1.05191200 | -2.94203100 |
| C  | 0.02310600  | 0.93118900  | -1.70545700 |
| N  | -0.09653900 | 1.68836900  | -2.58976400 |
| Cu | 0.31959300  | -0.15078500 | -0.12844700 |
| C  | 0.21432000  | -1.20012300 | 1.47318700  |
| N  | 0.14252200  | -1.79279800 | 2.47919200  |
| C  | -4.90979300 | -1.03935400 | -0.17006500 |
| C  | -4.28530600 | -0.35483100 | -1.21587500 |
| C  | -2.94221600 | -0.54621800 | -1.48935700 |
| C  | -2.17703400 | -1.44880200 | -0.73190200 |
| C  | -2.80042100 | -2.12693700 | 0.32907800  |
| C  | -4.14443600 | -1.92828600 | 0.59334900  |
| H  | -4.86439000 | 0.35274300  | -1.81090400 |
| H  | -2.45674500 | 0.02156400  | -2.28348400 |
| H  | -2.21918100 | -2.79294400 | 0.96376500  |
| H  | -4.61488100 | -2.45699500 | 1.42415100  |
| C  | -6.36315300 | -0.83455600 | 0.13897000  |
| C  | -0.78889700 | -1.68981700 | -1.10789900 |
| C  | -7.26507000 | -1.98869900 | -0.32295100 |
| H  | -6.89589800 | -2.91290300 | 0.15556200  |
| C  | -0.12405400 | -3.00060500 | -0.81587500 |
| H  | -0.27895200 | -3.35925800 | 0.20439200  |
| H  | -0.53087800 | -3.74623500 | -1.51995000 |

|   |             |             |             |
|---|-------------|-------------|-------------|
| H | 0.95687700  | -2.94573700 | -0.99005700 |
| H | -0.56269000 | -1.33284800 | -2.11332800 |
| H | -6.49282200 | -0.70214300 | 1.22635000  |
| H | -6.71866300 | 0.09664000  | -0.33413600 |
| C | -7.20134500 | -2.17028900 | -1.83244000 |
| H | -7.52910700 | -1.25127300 | -2.34338700 |
| H | -6.18435000 | -2.39774100 | -2.17630100 |
| H | -7.86014000 | -2.98464900 | -2.16122900 |
| C | -8.69637600 | -1.74351300 | 0.13097400  |
| H | -9.35677800 | -2.56906300 | -0.16497200 |
| H | -8.76437600 | -1.62976100 | 1.22126400  |
| H | -9.09215900 | -0.82364300 | -0.32567800 |

#### TS5b4

|   |            |             |             |
|---|------------|-------------|-------------|
| C | 4.64489700 | -1.03004800 | -1.78048200 |
| O | 4.55127900 | 0.38678700  | -1.50218600 |
| C | 3.47145900 | -1.60118500 | -0.95541900 |
| H | 2.87506000 | -2.35190400 | -1.49257400 |
| C | 3.35028800 | 0.59163600  | -0.91641000 |
| N | 2.63794600 | -0.43323100 | -0.64730100 |
| C | 3.01015900 | 2.00992300  | -0.68956000 |
| C | 4.11401600 | 3.04415700  | -0.87709900 |
| C | 3.08053600 | 2.91984600  | -1.91850700 |
| H | 5.10378600 | 2.64243600  | -1.07213500 |
| H | 4.07188100 | 3.89740400  | -0.20621200 |
| H | 3.32819200 | 2.41763600  | -2.85063400 |
| H | 2.29320600 | 3.66597700  | -1.98870300 |
| C | 0.59908500 | 3.75831500  | 1.31668400  |
| O | 1.82668200 | 3.64522200  | 0.56825300  |
| C | 0.33756800 | 2.31971000  | 1.80341000  |
| H | 0.66014000 | 2.11760200  | 2.83524500  |
| C | 1.96377600 | 2.33025100  | 0.29702600  |
| N | 1.18110300 | 1.51865600  | 0.90129700  |

|    |             |             |             |
|----|-------------|-------------|-------------|
| C  | 6.34011600  | -2.60138400 | 1.16512800  |
| C  | 5.74240100  | -3.08146400 | 2.32680600  |
| C  | 4.35350000  | -3.10141200 | 2.45680700  |
| C  | 3.53650000  | -2.64354200 | 1.42729900  |
| C  | 4.14137700  | -2.16966200 | 0.26927700  |
| C  | 5.52862800  | -2.14322700 | 0.13418800  |
| H  | 7.42570900  | -2.58122000 | 1.06840300  |
| H  | 6.36581500  | -3.44085500 | 3.14426400  |
| H  | 3.90046600  | -3.47294000 | 3.37407000  |
| H  | 2.45062800  | -2.63934700 | 1.53470600  |
| C  | 5.93740300  | -1.60320800 | -1.20914400 |
| H  | 6.71914100  | -0.83344900 | -1.15971800 |
| H  | 6.31931800  | -2.39892000 | -1.86622500 |
| C  | -1.94937300 | 1.12465900  | 2.12776900  |
| C  | -1.14021200 | 2.13495400  | 1.62168400  |
| C  | -1.67489200 | 3.18908700  | 0.88004200  |
| C  | -3.04305500 | 3.25680100  | 0.65067400  |
| C  | -3.86162200 | 2.25966700  | 1.17551200  |
| C  | -3.32080900 | 1.20090100  | 1.90346000  |
| H  | -1.51762000 | 0.29058600  | 2.68127300  |
| H  | -3.46990200 | 4.08106700  | 0.07964200  |
| H  | -4.93878000 | 2.30347700  | 1.01283000  |
| H  | -3.97486000 | 0.42375000  | 2.29648600  |
| C  | -0.59434400 | 4.12949100  | 0.42283000  |
| H  | -0.33423400 | 3.92690600  | -0.62988400 |
| H  | 0.77752400  | 4.48185200  | 2.11736900  |
| H  | -0.86960400 | 5.18923100  | 0.49610700  |
| H  | 4.54808900  | -1.14956400 | -2.86682300 |
| C  | -0.01350200 | 0.83328600  | -1.62471500 |
| N  | -0.05810100 | 1.78327600  | -2.31037400 |
| Cu | 0.39950100  | -0.22910600 | -0.09212100 |
| C  | 0.12306900  | -1.56734700 | 1.30021600  |
| N  | -0.06169000 | -2.40821500 | 2.09416500  |

|   |             |             |             |
|---|-------------|-------------|-------------|
| C | -4.92963800 | -0.96303000 | -0.16509200 |
| C | -4.50547600 | -0.05070000 | -1.13358500 |
| C | -3.20885900 | -0.08329900 | -1.61704500 |
| C | -2.29441000 | -1.03850500 | -1.15053500 |
| C | -2.71341300 | -1.95242100 | -0.17197100 |
| C | -4.01443400 | -1.91311400 | 0.30067700  |
| H | -5.20441500 | 0.70235100  | -1.50071000 |
| H | -2.87886900 | 0.64973900  | -2.35427600 |
| H | -2.00989700 | -2.67023100 | 0.24384300  |
| H | -4.32668200 | -2.62205700 | 1.06895300  |
| C | -6.32917600 | -0.93411800 | 0.37450600  |
| C | -0.97732100 | -1.09648100 | -1.78438400 |
| C | -7.22889100 | -2.05347500 | -0.16924000 |
| H | -6.74146100 | -3.01631200 | 0.06441500  |
| C | -0.16131600 | -2.35535800 | -1.83587900 |
| H | -0.04132600 | -2.85787300 | -0.87227000 |
| H | -0.67260800 | -3.04082900 | -2.53315800 |
| H | 0.82994100  | -2.14849300 | -2.25540800 |
| H | -1.00200300 | -0.63140500 | -2.76885400 |
| H | -6.29919900 | -1.01140200 | 1.47419300  |
| H | -6.80106900 | 0.03606400  | 0.14177700  |
| C | -7.38942900 | -1.94920500 | -1.67884200 |
| H | -7.84205000 | -0.98234900 | -1.95010400 |
| H | -6.42683900 | -2.02474000 | -2.20050100 |
| H | -8.04571800 | -2.74107100 | -2.06295600 |
| C | -8.58395600 | -2.01328900 | 0.52135400  |
| H | -9.23757700 | -2.82111400 | 0.16714400  |
| H | -8.48860800 | -2.10841100 | 1.61131500  |
| H | -9.09350200 | -1.06023700 | 0.31292400  |

**10b5**

|   |             |            |            |
|---|-------------|------------|------------|
| C | -3.06387800 | 1.36689600 | 0.31894200 |
| O | -2.41762700 | 0.66943700 | 1.41565800 |

|   |             |             |             |
|---|-------------|-------------|-------------|
| C | -1.86909400 | 1.80923000  | -0.55978800 |
| H | -1.96323000 | 1.53767900  | -1.62064700 |
| C | -1.10976000 | 0.57399600  | 1.09485700  |
| N | -0.71323900 | 1.11227300  | 0.01399200  |
| C | -0.27259000 | -0.11335600 | 2.09902300  |
| C | -0.67397100 | 0.13317400  | 3.55991700  |
| C | -0.92111300 | -1.18818400 | 2.96204400  |
| H | -1.51745700 | 0.80473200  | 3.69142400  |
| H | 0.14235300  | 0.24879400  | 4.26582900  |
| H | -1.93959600 | -1.44862700 | 2.68378200  |
| H | -0.27767500 | -2.01891700 | 3.24571700  |
| C | 3.26747000  | -0.64566700 | 2.51735600  |
| O | 1.89258700  | -0.56665400 | 2.94167600  |
| C | 3.28028700  | 0.13062100  | 1.20134600  |
| H | 3.50406600  | 1.20336400  | 1.28144200  |
| C | 1.17924500  | -0.21593000 | 1.85242500  |
| N | 1.85257600  | 0.03326500  | 0.78609000  |
| C | -2.89377700 | 5.08565300  | 0.82950100  |
| C | -1.90631100 | 5.95657300  | 0.37771200  |
| C | -0.86246600 | 5.49680500  | -0.42589300 |
| C | -0.78953200 | 4.15719500  | -0.79292100 |
| C | -1.77787600 | 3.29384700  | -0.33636300 |
| C | -2.82108500 | 3.74495500  | 0.46912100  |
| H | -3.70642900 | 5.44922800  | 1.45870100  |
| H | -1.94701000 | 7.00814300  | 0.65785700  |
| H | -0.09200600 | 6.18751200  | -0.76260000 |
| H | 0.03065200  | 3.78780900  | -1.40778200 |
| C | -3.77012800 | 2.62859100  | 0.81396900  |
| H | -3.99382900 | 2.55299300  | 1.88683700  |
| H | -4.73626600 | 2.74754800  | 0.30128800  |
| C | 4.88874700  | -0.17734200 | -0.80526800 |
| C | 4.25849400  | -0.61190800 | 0.35217600  |
| C | 4.51159100  | -1.87139700 | 0.89823800  |

|    |             |             |             |
|----|-------------|-------------|-------------|
| C  | 5.38930800  | -2.73839600 | 0.26139200  |
| C  | 6.01055600  | -2.31889600 | -0.91455900 |
| C  | 5.77123500  | -1.04906000 | -1.43982300 |
| H  | 4.69004900  | 0.82139800  | -1.19600100 |
| H  | 5.59948200  | -3.72483400 | 0.67407500  |
| H  | 6.70563300  | -2.98672500 | -1.42083500 |
| H  | 6.28255700  | -0.73509600 | -2.34780900 |
| C  | 3.71844100  | -2.07300600 | 2.16465700  |
| H  | 2.82976200  | -2.70302400 | 1.99008800  |
| H  | 3.87204500  | -0.19529400 | 3.30935900  |
| H  | 4.28992900  | -2.55086100 | 2.96995400  |
| H  | -3.73408800 | 0.64002500  | -0.15752800 |
| C  | 0.81635400  | 1.21780300  | -2.76496600 |
| N  | 0.38681100  | 1.63597200  | -3.76829200 |
| Cu | 1.29500000  | 0.71738800  | -1.03428900 |
| C  | 2.27697600  | 2.41813000  | -0.65290400 |
| N  | 2.98211900  | 3.29848900  | -0.34064400 |
| C  | -3.04062900 | -2.24374700 | -0.49152000 |
| C  | -2.89155000 | -1.48443200 | -1.65660400 |
| C  | -1.63581100 | -1.15528100 | -2.13952000 |
| C  | -0.47303900 | -1.56865900 | -1.46936200 |
| C  | -0.62251800 | -2.36399100 | -0.32391300 |
| C  | -1.88329300 | -2.70007100 | 0.14515100  |
| H  | -3.78327600 | -1.14334500 | -2.18650000 |
| H  | -1.53126000 | -0.54193000 | -3.03597900 |
| H  | 0.25982700  | -2.72061500 | 0.20873500  |
| H  | -1.97898200 | -3.32123500 | 1.03831700  |
| C  | -4.39437100 | -2.57734800 | 0.06325500  |
| C  | 0.82982800  | -1.19008400 | -2.00750600 |
| C  | -4.81996500 | -4.03636300 | -0.15157300 |
| H  | -4.05007600 | -4.68185300 | 0.30716000  |
| C  | 2.04336800  | -2.01243200 | -1.69064500 |
| H  | 2.20327600  | -2.18000400 | -0.62046800 |



|   |             |             |             |
|---|-------------|-------------|-------------|
| H | 1.92350800  | -2.99905700 | -2.17013700 |
| H | 2.95473400  | -1.56113600 | -2.09865100 |
| H | 0.77098400  | -0.97652600 | -3.07297000 |
| H | -4.40811800 | -2.35699800 | 1.14470000  |
| H | -5.15624800 | -1.92289300 | -0.39417300 |
| C | -4.90662400 | -4.37151100 | -1.63345800 |
| H | -5.64172400 | -3.71996400 | -2.13148400 |
| H | -3.94362400 | -4.23745100 | -2.14243100 |
| H | -5.22821900 | -5.40985100 | -1.78659000 |
| C | -6.14932000 | -4.29823000 | 0.54045400  |
| H | -6.46243600 | -5.34374700 | 0.42262100  |
| H | -6.09987600 | -4.07863200 | 1.61552000  |
| H | -6.93917400 | -3.66617300 | 0.10716000  |

**TS5b5**

|   |             |             |             |
|---|-------------|-------------|-------------|
| C | -3.06338300 | 1.54052100  | 0.27683600  |
| O | -2.45222600 | 0.85497700  | 1.40135600  |
| C | -1.84025100 | 1.94858500  | -0.57467600 |
| H | -1.92909500 | 1.70803200  | -1.64290900 |
| C | -1.15151400 | 0.68159900  | 1.08628200  |
| N | -0.72435500 | 1.19145100  | 0.00200700  |
| C | -0.36188200 | -0.05606300 | 2.09140800  |
| C | -0.80409900 | 0.13418700  | 3.54636000  |
| C | -1.06243700 | -1.15428700 | 2.88410400  |
| H | -1.63634800 | 0.81841200  | 3.68353500  |
| H | -0.00773200 | 0.19779700  | 4.28111300  |
| H | -2.07628300 | -1.38184100 | 2.56291200  |
| H | -0.44400100 | -2.01052600 | 3.14755300  |
| C | 3.13644000  | -0.74689600 | 2.56631900  |
| O | 1.76685900  | -0.58508000 | 2.97940300  |
| C | 3.21462500  | 0.04915600  | 1.26382100  |
| H | 3.49754000  | 1.10619100  | 1.36150500  |
| C | 1.09157300  | -0.19873100 | 1.87659400  |

|    |             |             |             |
|----|-------------|-------------|-------------|
| N  | 1.79046200  | 0.03263100  | 0.82401700  |
| C  | -2.77934600 | 5.23982800  | 0.83705500  |
| C  | -1.73716300 | 6.07479100  | 0.44377200  |
| C  | -0.67963500 | 5.58428400  | -0.32304100 |
| C  | -0.64700600 | 4.24903300  | -0.71210700 |
| C  | -1.69183800 | 3.42298300  | -0.31644700 |
| C  | -2.74880900 | 3.90425600  | 0.45313200  |
| H  | -3.60124900 | 5.62709200  | 1.43948300  |
| H  | -1.74509900 | 7.12210000  | 0.74209200  |
| H  | 0.13256200  | 6.24761400  | -0.61363300 |
| H  | 0.18313700  | 3.85354800  | -1.29741300 |
| C  | -3.75632600 | 2.82159100  | 0.73517500  |
| H  | -4.04972400 | 2.75133300  | 1.79137600  |
| H  | -4.68296900 | 2.97353700  | 0.16175500  |
| C  | 4.86570800  | -0.31787500 | -0.70162900 |
| C  | 4.16704500  | -0.73665200 | 0.42197100  |
| C  | 4.31820100  | -2.02375200 | 0.94256800  |
| C  | 5.15212300  | -2.93504100 | 0.30904300  |
| C  | 5.83696500  | -2.53141100 | -0.83663900 |
| C  | 5.70515600  | -1.23402600 | -1.33175400 |
| H  | 4.74648700  | 0.70238300  | -1.06883900 |
| H  | 5.28146700  | -3.94295400 | 0.70283200  |
| H  | 6.49909200  | -3.23372400 | -1.34059600 |
| H  | 6.26797100  | -0.93356500 | -2.21366400 |
| C  | 3.48364600  | -2.19601800 | 2.18557700  |
| H  | 2.55130700  | -2.74705300 | 1.97431600  |
| H  | 3.76464700  | -0.35753200 | 3.37218400  |
| H  | 3.99668800  | -2.73911100 | 2.98891300  |
| H  | -3.73240400 | 0.81359100  | -0.20251600 |
| C  | 0.68773800  | 1.21530000  | -2.73792500 |
| N  | 0.21230200  | 1.72655000  | -3.67688200 |
| Cu | 1.26123200  | 0.81285800  | -1.01014100 |
| C  | 2.46962100  | 2.36875000  | -0.71700300 |

|   |             |             |             |
|---|-------------|-------------|-------------|
| N | 3.31456600  | 3.13346500  | -0.44875500 |
| C | -2.93570000 | -2.36092400 | -0.43408900 |
| C | -2.92922500 | -1.51846900 | -1.55063400 |
| C | -1.73957000 | -1.08870100 | -2.11462500 |
| C | -0.50367600 | -1.47009600 | -1.56981500 |
| C | -0.50790700 | -2.32778000 | -0.46145100 |
| C | -1.70423900 | -2.77308000 | 0.08216200  |
| H | -3.88047300 | -1.20660500 | -1.98633500 |
| H | -1.74624000 | -0.42762200 | -2.98264100 |
| H | 0.43601600  | -2.65664200 | -0.02625900 |
| H | -1.68888900 | -3.45057900 | 0.93869600  |
| C | -4.21820400 | -2.84161500 | 0.17887800  |
| C | 0.72538700  | -1.01288000 | -2.21915000 |
| C | -4.58397900 | -4.28605400 | -0.19358800 |
| H | -3.74190100 | -4.93240000 | 0.11158400  |
| C | 2.02842600  | -1.72486500 | -2.00748900 |
| H | 2.28596600  | -1.89898800 | -0.95768700 |
| H | 1.96691400  | -2.70522300 | -2.50951500 |
| H | 2.85714300  | -1.17535600 | -2.46829900 |
| H | 0.55903800  | -0.83894100 | -3.28003300 |
| H | -4.15242600 | -2.76906200 | 1.27747600  |
| H | -5.04846500 | -2.18172800 | -0.12565400 |
| C | -4.78681900 | -4.43808500 | -1.69393800 |
| H | -5.59902900 | -3.77961100 | -2.03995400 |
| H | -3.88315700 | -4.17977000 | -2.26045900 |
| H | -5.06432000 | -5.46814200 | -1.95274900 |
| C | -5.82973200 | -4.71868400 | 0.56530800  |
| H | -6.09628900 | -5.75864300 | 0.33634600  |
| H | -5.69508300 | -4.63528000 | 1.65220000  |
| H | -6.68791500 | -4.08872900 | 0.28641400  |

**10b6**

|   |             |            |             |
|---|-------------|------------|-------------|
| C | -4.83528300 | 1.17564400 | -0.21430500 |
|---|-------------|------------|-------------|

|   |             |             |             |
|---|-------------|-------------|-------------|
| O | -3.98753400 | 2.12592600  | -0.89218400 |
| C | -3.93198500 | 0.61457400  | 0.89967900  |
| H | -4.05907800 | 1.08199000  | 1.88686600  |
| C | -2.72651300 | 1.77666600  | -0.56132200 |
| N | -2.58527600 | 0.94699800  | 0.40255900  |
| C | -1.67383600 | 2.38547100  | -1.38889000 |
| C | -1.97166700 | 2.46715500  | -2.88871300 |
| C | -2.01572800 | 3.69896800  | -2.08354500 |
| H | -2.90090700 | 2.00069100  | -3.20538000 |
| H | -1.11730700 | 2.28766700  | -3.53591100 |
| H | -2.98547100 | 4.12106200  | -1.83486500 |
| H | -1.19743900 | 4.40801600  | -2.16831000 |
| C | 1.93911300  | 2.41778000  | -1.37580700 |
| O | 0.62158400  | 2.92809700  | -1.68562700 |
| C | 1.65299200  | 1.45106600  | -0.20790400 |
| H | 2.15069300  | 0.47857700  | -0.31284900 |
| C | -0.26291500 | 2.13902100  | -1.03236700 |
| N | 0.19867600  | 1.26002800  | -0.23237600 |
| C | -5.31626300 | -2.53514400 | -0.44117400 |
| C | -4.96744200 | -3.48912300 | 0.51225700  |
| C | -4.25312100 | -3.12837800 | 1.65517500  |
| C | -3.87347700 | -1.80365500 | 1.86107300  |
| C | -4.22578100 | -0.85769500 | 0.90569600  |
| C | -4.94393800 | -1.21326500 | -0.23564900 |
| H | -5.87555600 | -2.82223400 | -1.33094600 |
| H | -5.26105500 | -4.52755500 | 0.36617500  |
| H | -3.99673600 | -3.88478800 | 2.39520100  |
| H | -3.30724800 | -1.51312100 | 2.74586400  |
| C | -5.18618500 | -0.01989300 | -1.11675700 |
| H | -4.49834600 | -0.03788200 | -1.97821700 |
| H | -6.20735200 | 0.03191700  | -1.51497600 |
| C | 1.93428200  | 1.86769500  | 2.34363300  |
| C | 2.11757700  | 2.20691200  | 1.00851200  |

|    |             |             |             |
|----|-------------|-------------|-------------|
| C  | 2.76760600  | 3.38539600  | 0.64532800  |
| C  | 3.25894300  | 4.24300000  | 1.62265300  |
| C  | 3.08576600  | 3.90569400  | 2.96191100  |
| C  | 2.42594600  | 2.72963800  | 3.31944900  |
| H  | 1.38643000  | 0.96624400  | 2.62084300  |
| H  | 3.76550100  | 5.16792300  | 1.34628700  |
| H  | 3.46129800  | 4.57089900  | 3.73813300  |
| H  | 2.28364100  | 2.48662900  | 4.37090300  |
| C  | 2.84515700  | 3.52829700  | -0.85086600 |
| H  | 2.51610300  | 4.50944400  | -1.21896000 |
| H  | 2.31480700  | 1.93305900  | -2.28569900 |
| H  | 3.87210000  | 3.38288800  | -1.21823800 |
| H  | -5.71214000 | 1.72373600  | 0.14124700  |
| C  | -1.51170700 | -0.96173000 | -1.43823200 |
| N  | -1.82651600 | -1.02374900 | -2.56348800 |
| Cu | -1.09004600 | -0.60668400 | 0.40646000  |
| C  | -0.78861500 | -0.54005800 | 2.29922300  |
| N  | -0.59720200 | -0.51571000 | 3.45304900  |
| C  | 3.87837700  | -1.60345400 | -0.49412500 |
| C  | 2.95668700  | -1.92387600 | -1.49976200 |
| C  | 1.63452800  | -2.20634000 | -1.20027500 |
| C  | 1.18896900  | -2.18797500 | 0.13202700  |
| C  | 2.10692100  | -1.84456300 | 1.13895800  |
| C  | 3.42864800  | -1.56563800 | 0.82926800  |
| H  | 3.29011200  | -1.94067900 | -2.53866000 |
| H  | 0.92844600  | -2.41716900 | -2.00197700 |
| H  | 1.75794700  | -1.78342300 | 2.17064100  |
| H  | 4.12753400  | -1.30149800 | 1.62392300  |
| C  | 5.31192300  | -1.33171000 | -0.84238500 |
| C  | -0.17515400 | -2.54186000 | 0.51243200  |
| C  | 6.11916700  | -2.59955800 | -1.16072600 |
| H  | 5.61030800  | -3.12017600 | -1.99115500 |
| C  | -0.97566600 | -3.54529000 | -0.25726800 |

|   |             |             |             |
|---|-------------|-------------|-------------|
| H | -0.90688700 | -3.43606900 | -1.34191400 |
| H | -0.59973900 | -4.54427500 | 0.02366900  |
| H | -2.03566400 | -3.50251700 | 0.02221900  |
| H | -0.28449100 | -2.68002900 | 1.58816800  |
| H | 5.80693800  | -0.80276200 | -0.01111000 |
| H | 5.35888400  | -0.65951700 | -1.71463300 |
| C | 6.17245100  | -3.53867500 | 0.03542300  |
| H | 5.17279500  | -3.86897800 | 0.34521700  |
| H | 6.76831500  | -4.43260900 | -0.19029100 |
| H | 6.64064800  | -3.03656100 | 0.89661500  |
| C | 7.52224400  | -2.22017500 | -1.61077700 |
| H | 8.11224700  | -3.10858500 | -1.87100100 |
| H | 7.50447000  | -1.55739400 | -2.48643600 |
| H | 8.05525200  | -1.69375400 | -0.80459200 |

**TS5b6**

|   |             |            |             |
|---|-------------|------------|-------------|
| C | -4.76792200 | 1.06067000 | -0.63967700 |
| O | -3.87407600 | 1.93912000 | -1.35180500 |
| C | -3.98121400 | 0.70589700 | 0.63539200  |
| H | -4.22662800 | 1.31701100 | 1.51618500  |
| C | -2.65079800 | 1.68853100 | -0.83846500 |
| N | -2.59088700 | 1.00342500 | 0.24197500  |
| C | -1.53155400 | 2.22636200 | -1.62998000 |
| C | -1.67437300 | 2.11701000 | -3.15116200 |
| C | -1.82752700 | 3.43423700 | -2.51184800 |
| H | -2.55205500 | 1.57751500 | -3.49667000 |
| H | -0.75380800 | 1.89014100 | -3.68261500 |
| H | -2.82719500 | 3.84829400 | -2.41297400 |
| H | -1.02180800 | 4.15706200 | -2.60138000 |
| C | 2.05855200  | 2.39183400 | -1.25518600 |
| O | 0.76490200  | 2.84369200 | -1.71926800 |
| C | 1.68242400  | 1.49434900 | -0.05961000 |
| H | 2.22215000  | 0.53928900 | -0.04261100 |

|    |             |             |             |
|----|-------------|-------------|-------------|
| C  | -0.15909800 | 2.06205200  | -1.11677400 |
| N  | 0.24730600  | 1.24305600  | -0.22535800 |
| C  | -5.19435900 | -2.64416100 | -0.32935900 |
| C  | -4.97871800 | -3.42036500 | 0.80738400  |
| C  | -4.41541800 | -2.86379000 | 1.95607400  |
| C  | -4.04754000 | -1.51983200 | 1.98001500  |
| C  | -4.26486900 | -0.75240800 | 0.84253000  |
| C  | -4.84270500 | -1.30112500 | -0.30271800 |
| H  | -5.64072700 | -3.08240100 | -1.22128000 |
| H  | -5.26207900 | -4.47186900 | 0.80194600  |
| H  | -4.26721600 | -3.48114600 | 2.84084400  |
| H  | -3.59536700 | -1.07778200 | 2.86739500  |
| C  | -4.98554900 | -0.26755800 | -1.38429900 |
| H  | -4.19214100 | -0.39904200 | -2.13902900 |
| H  | -5.94953900 | -0.31106700 | -1.90651300 |
| C  | 1.65410400  | 2.10564900  | 2.46798100  |
| C  | 1.98431200  | 2.35149700  | 1.14099700  |
| C  | 2.64207200  | 3.52166500  | 0.76530700  |
| C  | 2.99627500  | 4.46337000  | 1.72425400  |
| C  | 2.67831300  | 4.21837000  | 3.05701900  |
| C  | 2.00924600  | 3.05098300  | 3.42554700  |
| H  | 1.09916100  | 1.20914900  | 2.74722300  |
| H  | 3.50769000  | 5.38247400  | 1.43784300  |
| H  | 2.94581700  | 4.94974800  | 3.81825400  |
| H  | 1.75255100  | 2.88122200  | 4.46969000  |
| C  | 2.88249600  | 3.55932700  | -0.71999600 |
| H  | 2.57969700  | 4.50317200  | -1.19295300 |
| H  | 2.53054300  | 1.86079200  | -2.09177100 |
| H  | 3.94573800  | 3.41247500  | -0.96201200 |
| H  | -5.69356000 | 1.61643600  | -0.46455700 |
| C  | -1.43472300 | -1.09599400 | -1.59835100 |
| N  | -1.75296300 | -1.31429300 | -2.70455400 |
| Cu | -1.03403400 | -0.54957100 | 0.26082800  |

|   |             |             |             |
|---|-------------|-------------|-------------|
| C | -0.80588700 | -0.69261700 | 2.13473300  |
| N | -0.82494600 | -0.39511800 | 3.26762400  |
| C | 3.88339600  | -1.64149800 | -0.42451200 |
| C | 2.84358700  | -2.02377100 | -1.28020300 |
| C | 1.55957200  | -2.24135000 | -0.80566600 |
| C | 1.27831600  | -2.09090500 | 0.55980900  |
| C | 2.31511200  | -1.69962300 | 1.41822600  |
| C | 3.59617700  | -1.48019800 | 0.93362200  |
| H | 3.04852600  | -2.14416900 | -2.34504000 |
| H | 0.76234700  | -2.49940000 | -1.50059800 |
| H | 2.10023300  | -1.55691000 | 2.47851100  |
| H | 4.39090300  | -1.17726100 | 1.61641700  |
| C | 5.27080100  | -1.44517400 | -0.96159100 |
| C | -0.04395300 | -2.37847800 | 1.14816700  |
| C | 6.00765300  | -2.75989300 | -1.25867500 |
| H | 5.39283700  | -3.33285000 | -1.97495600 |
| C | -0.99007000 | -3.37968300 | 0.54521800  |
| H | -1.09133100 | -3.30456600 | -0.53943600 |
| H | -0.60836900 | -4.38077100 | 0.80651200  |
| H | -1.99058700 | -3.28419000 | 0.98468500  |
| H | 0.06613200  | -2.58430600 | 2.21220800  |
| H | 5.87315200  | -0.86267700 | -0.24452200 |
| H | 5.22674900  | -0.85190500 | -1.88938300 |
| C | 6.18232200  | -3.59538100 | 0.00105800  |
| H | 5.21943200  | -3.86640300 | 0.45250800  |
| H | 6.72767700  | -4.52375300 | -0.21291500 |
| H | 6.76025500  | -3.03726000 | 0.75449100  |
| C | 7.35515800  | -2.46486900 | -1.90073600 |
| H | 7.89079700  | -3.39041600 | -2.14875800 |
| H | 7.24761500  | -1.87877200 | -2.82335200 |
| H | 7.99156800  | -1.88907400 | -1.21174900 |

10b7



|   |             |             |             |
|---|-------------|-------------|-------------|
| C | 3.92260500  | -0.64031600 | -2.42138300 |
| O | 3.46318200  | 0.73125100  | -2.33617600 |
| C | 3.27142400  | -1.28935000 | -1.18345600 |
| H | 2.76494000  | -2.24131900 | -1.40213600 |
| C | 2.51457300  | 0.79106600  | -1.38861400 |
| N | 2.27999500  | -0.29589500 | -0.74802000 |
| C | 1.92867500  | 2.12488400  | -1.18625700 |
| C | 2.96492300  | 3.25423500  | -1.13231800 |
| C | 2.08295000  | 3.14936800  | -2.30640400 |
| H | 3.99998600  | 2.93810100  | -1.22531800 |
| H | 2.77110400  | 4.01515300  | -0.38269200 |
| H | 2.49563700  | 2.77860700  | -3.24068200 |
| H | 1.26082500  | 3.85481500  | -2.39764000 |
| C | -0.70361500 | 3.49923800  | 0.84095900  |
| O | 0.47634000  | 3.55919400  | 0.01793000  |
| C | -0.78616400 | 2.01912100  | 1.25304000  |
| H | -0.33199900 | 1.79724300  | 2.23124800  |
| C | 0.76586400  | 2.27670600  | -0.28813200 |
| N | 0.05951900  | 1.35450800  | 0.23932200  |
| C | 6.79395600  | -1.11684700 | -0.05792500 |
| C | 6.73617600  | -1.50099400 | 1.27799900  |
| C | 5.52122000  | -1.84721700 | 1.86889400  |
| C | 4.34451200  | -1.81839400 | 1.12932200  |
| C | 4.40719400  | -1.43488700 | -0.20480100 |
| C | 5.61796600  | -1.08284000 | -0.79762700 |
| H | 7.74450800  | -0.84014400 | -0.51326300 |
| H | 7.64810300  | -1.52265700 | 1.87200700  |
| H | 5.48945000  | -2.12631700 | 2.91974300  |
| H | 3.39122800  | -2.05626700 | 1.60327200  |
| C | 5.43617800  | -0.71937500 | -2.24611200 |
| H | 5.90917400  | 0.23091800  | -2.52736000 |
| H | 5.85346900  | -1.48775600 | -2.91341800 |
| C | -2.92900700 | 0.66194000  | 1.80956400  |

|    |             |             |             |
|----|-------------|-------------|-------------|
| C  | -2.25397700 | 1.71795100  | 1.21435700  |
| C  | -2.94290800 | 2.74042400  | 0.55762000  |
| C  | -4.32861000 | 2.71193300  | 0.47780600  |
| C  | -5.01315800 | 1.65463300  | 1.07683100  |
| C  | -4.31987800 | 0.63916500  | 1.73349800  |
| H  | -2.37946400 | -0.11958900 | 2.33751600  |
| H  | -4.87481200 | 3.51472900  | -0.01774100 |
| H  | -6.10295700 | 1.62980500  | 1.04534100  |
| H  | -4.87057400 | -0.17338900 | 2.20627900  |
| C  | -1.99011400 | 3.79159300  | 0.05376000  |
| H  | -1.78883900 | 3.67164300  | -1.02306300 |
| H  | -0.54894800 | 4.18850600  | 1.67562000  |
| H  | -2.35532300 | 4.81657700  | 0.19656200  |
| H  | 3.56694700  | -1.02748000 | -3.38320300 |
| C  | 2.24294100  | 0.65185200  | 1.99027000  |
| N  | 2.84451100  | 1.55694500  | 2.42431500  |
| Cu | 1.11210100  | -0.58348200 | 0.87473200  |
| C  | 0.09657100  | -1.31356400 | 2.26378900  |
| N  | -0.55826700 | -1.69293200 | 3.15446900  |
| C  | -4.06471900 | -1.20123500 | -1.01959900 |
| C  | -3.72789100 | -2.13321500 | -0.03408600 |
| C  | -2.40401300 | -2.40639100 | 0.27954600  |
| C  | -1.36004900 | -1.76274700 | -0.39680900 |
| C  | -1.70038800 | -0.80874900 | -1.37196700 |
| C  | -3.02045400 | -0.53832300 | -1.67485100 |
| H  | -4.51246600 | -2.65344000 | 0.51378000  |
| H  | -2.17824000 | -3.11898300 | 1.07077500  |
| H  | -0.89857600 | -0.28298500 | -1.89230500 |
| H  | -3.26265200 | 0.20660000  | -2.43481200 |
| C  | -5.47933200 | -0.82601100 | -1.37467400 |
| C  | 0.04589800  | -2.09510100 | -0.19830300 |
| C  | -6.61262900 | -1.65339800 | -0.77613500 |
| H  | -6.45200800 | -1.72960700 | 0.31391900  |

|   |             |             |             |
|---|-------------|-------------|-------------|
| C | 0.43961800  | -3.45391500 | 0.30917800  |
| H | -0.04411200 | -3.71260500 | 1.25537900  |
| H | 0.16102200  | -4.21266700 | -0.44112800 |
| H | 1.52361800  | -3.52626500 | 0.46741400  |
| H | 0.62422700  | -1.79721900 | -1.07735600 |
| H | -5.58491200 | -0.83673000 | -2.47477000 |
| H | -5.61669200 | 0.23049000  | -1.08484200 |
| C | -6.66227900 | -3.05523500 | -1.37227200 |
| H | -5.71212400 | -3.59286700 | -1.26186600 |
| H | -7.45073600 | -3.66049200 | -0.90580400 |
| H | -6.88352500 | -2.99654100 | -2.44892100 |
| C | -7.94096500 | -0.94302400 | -1.00034800 |
| H | -8.77926700 | -1.52184700 | -0.59101000 |
| H | -7.95431700 | 0.05038200  | -0.53120600 |
| H | -8.12765900 | -0.80527400 | -2.07633300 |

**TS5b7**

|   |             |             |             |
|---|-------------|-------------|-------------|
| C | -3.86060400 | -0.68942900 | 2.48441900  |
| O | -3.45141300 | 0.69613600  | 2.37739600  |
| C | -3.22714300 | -1.32031200 | 1.22738700  |
| H | -2.69676000 | -2.26393400 | 1.42802800  |
| C | -2.52649500 | 0.77469700  | 1.40568100  |
| N | -2.27241600 | -0.30517000 | 0.76300100  |
| C | -1.98867000 | 2.12353200  | 1.16993000  |
| C | -3.06938100 | 3.20766900  | 1.06757000  |
| C | -2.19640400 | 3.17651800  | 2.25298600  |
| H | -4.09145500 | 2.85087200  | 1.15980700  |
| H | -2.89983100 | 3.94891800  | 0.29255400  |
| H | -2.60446300 | 2.81888800  | 3.19435600  |
| H | -1.40593600 | 3.91863300  | 2.32984900  |
| C | 0.63529700  | 3.55022500  | -0.83075500 |
| O | -0.55511000 | 3.58262800  | -0.02246900 |
| C | 0.74987400  | 2.07493500  | -1.25178300 |

|   |             |             |             |
|---|-------------|-------------|-------------|
| H | 0.31704000  | 1.85109000  | -2.23929000 |
| C | -0.82514600 | 2.29431800  | 0.27583700  |
| N | -0.09896200 | 1.38729800  | -0.25451800 |
| C | -6.78542800 | -1.23578500 | 0.20531400  |
| C | -6.75544500 | -1.60351300 | -1.13617000 |
| C | -5.54850100 | -1.90735500 | -1.76559300 |
| C | -4.35260300 | -1.85322800 | -1.05885100 |
| C | -4.38742200 | -1.48831600 | 0.28114200  |
| C | -5.59011900 | -1.17665700 | 0.91189600  |
| H | -7.72981600 | -0.99015600 | 0.69041600  |
| H | -7.68305100 | -1.64418200 | -1.70437000 |
| H | -5.53876600 | -2.17205000 | -2.82063000 |
| H | -3.40621100 | -2.05404400 | -1.56292500 |
| C | -5.37519000 | -0.82016300 | 2.35762300  |
| H | -5.87244800 | 0.10993800  | 2.66340000  |
| H | -5.74301800 | -1.60924700 | 3.03002000  |
| C | 2.92410700  | 0.74873600  | -1.76295900 |
| C | 2.22086600  | 1.79465500  | -1.18203000 |
| C | 2.87916600  | 2.81624600  | -0.49415500 |
| C | 4.26104200  | 2.79087700  | -0.35892100 |
| C | 4.97287300  | 1.73937800  | -0.93535500 |
| C | 4.31058900  | 0.72885500  | -1.63093600 |
| H | 2.39927300  | -0.03043000 | -2.31852300 |
| H | 4.78412400  | 3.59159200  | 0.16419200  |
| H | 6.06043300  | 1.71638800  | -0.85756800 |
| H | 4.88256400  | -0.07833000 | -2.08734500 |
| C | 1.90429800  | 3.86138700  | -0.02106700 |
| H | 1.68252000  | 3.75428200  | 1.05278900  |
| H | 0.47856100  | 4.24285400  | -1.66214400 |
| H | 2.26283700  | 4.88808700  | -0.16913500 |
| H | -3.46162900 | -1.05978900 | 3.43600500  |
| C | -2.30037700 | 0.69808100  | -2.07035500 |
| N | -2.91408600 | 1.60337500  | -2.48717500 |

|    |             |             |             |
|----|-------------|-------------|-------------|
| Cu | -1.15093400 | -0.49804700 | -0.97224100 |
| C  | -0.02358900 | -1.35318600 | -2.18569200 |
| N  | 0.62966500  | -1.68359800 | -3.09873600 |
| C  | 4.10396100  | -1.26203900 | 1.00534200  |
| C  | 3.83548400  | -2.18311800 | -0.01084100 |
| C  | 2.53452200  | -2.45852500 | -0.40836700 |
| C  | 1.45096700  | -1.82522600 | 0.20835500  |
| C  | 1.71929500  | -0.89228400 | 1.22224500  |
| C  | 3.01751500  | -0.62263700 | 1.61217800  |
| H  | 4.65556500  | -2.68741200 | -0.51991400 |
| H  | 2.35981700  | -3.15531700 | -1.22644600 |
| H  | 0.88415100  | -0.37391000 | 1.69474900  |
| H  | 3.20776800  | 0.11061300  | 2.39761100  |
| C  | 5.49182700  | -0.86908600 | 1.43995100  |
| C  | 0.05753200  | -2.14649500 | -0.10431900 |
| C  | 6.67301700  | -1.62133600 | 0.83467500  |
| H  | 6.54119700  | -1.65313900 | -0.26153100 |
| C  | -0.32261200 | -3.52712500 | -0.56123100 |
| H  | 0.23514600  | -3.85706500 | -1.44191300 |
| H  | -0.12555500 | -4.23244000 | 0.26200300  |
| H  | -1.39079500 | -3.58291700 | -0.80523700 |
| H  | -0.58369100 | -1.81067300 | 0.71535600  |
| H  | 5.55725200  | -0.94514600 | 2.54058500  |
| H  | 5.60351700  | 0.20737400  | 1.22141500  |
| C  | 6.76773500  | -3.04600900 | 1.36852300  |
| H  | 5.84185500  | -3.61527500 | 1.21773800  |
| H  | 7.58721700  | -3.59861600 | 0.89035000  |
| H  | 6.96863500  | -3.02735800 | 2.45054500  |
| C  | 7.96505900  | -0.86909400 | 1.12489000  |
| H  | 8.83657200  | -1.39663000 | 0.71566600  |
| H  | 7.95015100  | 0.14285200  | 0.69732600  |
| H  | 8.11770400  | -0.76954200 | 2.21038400  |

**10b8**

|   |             |             |             |
|---|-------------|-------------|-------------|
| C | 0.36372800  | 3.42570300  | -1.73285800 |
| O | -0.97758800 | 3.07250600  | -2.12920200 |
| C | 0.89258500  | 2.14797500  | -1.05633200 |
| H | 1.55357400  | 1.53412400  | -1.68308100 |
| C | -1.31643800 | 1.99985700  | -1.39266500 |
| N | -0.35435500 | 1.38382800  | -0.80429800 |
| C | -2.76986200 | 1.75189600  | -1.34678800 |
| C | -3.62935300 | 3.02321300  | -1.29261600 |
| C | -3.59280000 | 2.23847900  | -2.53692900 |
| H | -3.07724800 | 3.95707000  | -1.24044400 |
| H | -4.50306100 | 2.95616800  | -0.65129000 |
| H | -3.02370400 | 2.62457200  | -3.37815000 |
| H | -4.45256300 | 1.62322700  | -2.78788700 |
| C | -4.95406900 | -0.68343500 | 0.17182300  |
| O | -4.65169100 | 0.50803400  | -0.58347200 |
| C | -3.62688100 | -1.01226000 | 0.89209400  |
| H | -3.58375600 | -0.71248200 | 1.95037600  |
| C | -3.30442300 | 0.62452500  | -0.56147900 |
| N | -2.64987400 | -0.18983800 | 0.16364700  |
| C | 1.73193300  | 4.63117500  | 1.54508700  |
| C | 2.49993600  | 3.91484300  | 2.45794800  |
| C | 2.80063400  | 2.57198300  | 2.23693800  |
| C | 2.33513500  | 1.92297100  | 1.09815700  |
| C | 1.55695800  | 2.63888900  | 0.19757200  |
| C | 1.25746800  | 3.98167300  | 0.41441200  |
| H | 1.49177300  | 5.67830000  | 1.72514200  |
| H | 2.86738000  | 4.40801200  | 3.35616800  |
| H | 3.40076400  | 2.02419100  | 2.96078100  |
| H | 2.56829000  | 0.87243500  | 0.92884800  |
| C | 0.35571700  | 4.52213700  | -0.65685200 |
| H | -0.66753300 | 4.63824500  | -0.26444700 |
| H | 0.66747500  | 5.49924800  | -1.04764600 |

|    |             |             |             |
|----|-------------|-------------|-------------|
| C  | -2.51635400 | -3.33049900 | 1.28726800  |
| C  | -3.44288200 | -2.48751400 | 0.68489200  |
| C  | -4.34397000 | -2.96472400 | -0.26623900 |
| C  | -4.31182000 | -4.29956200 | -0.65092100 |
| C  | -3.36961000 | -5.14436300 | -0.07013400 |
| C  | -2.48291600 | -4.66609400 | 0.89466900  |
| H  | -1.83249400 | -2.94872400 | 2.04747600  |
| H  | -5.01474400 | -4.68195900 | -1.39098200 |
| H  | -3.33370400 | -6.19265400 | -0.36252700 |
| H  | -1.76552400 | -5.34432800 | 1.35327200  |
| C  | -5.26205600 | -1.87531200 | -0.75008600 |
| H  | -5.04999200 | -1.59205200 | -1.79233300 |
| H  | -5.78137500 | -0.43355700 | 0.84160400  |
| H  | -6.32035400 | -2.16599600 | -0.71546000 |
| H  | 0.90026400  | 3.70986600  | -2.64227500 |
| C  | -1.18483900 | 1.81107900  | 1.79817000  |
| N  | -1.67692800 | 2.83552700  | 2.07893100  |
| Cu | -0.52334200 | 0.18606600  | 0.81491600  |
| C  | -0.24815900 | -0.84218600 | 2.36321500  |
| N  | -0.12062500 | -1.50495700 | 3.31750900  |
| C  | 4.52597800  | -1.13633000 | -0.34520200 |
| C  | 3.72336400  | -0.82087700 | -1.44462000 |
| C  | 2.34255300  | -0.94356900 | -1.38405400 |
| C  | 1.70426700  | -1.38105200 | -0.21232800 |
| C  | 2.51522600  | -1.70401200 | 0.88949000  |
| C  | 3.89384300  | -1.58563000 | 0.81896000  |
| H  | 4.19605000  | -0.47833400 | -2.36697800 |
| H  | 1.74777800  | -0.71146800 | -2.26749600 |
| H  | 2.03797700  | -2.02315000 | 1.81630300  |
| H  | 4.50172800  | -1.84434800 | 1.68711600  |
| C  | 6.01989200  | -1.03455500 | -0.43951800 |
| C  | 0.25016700  | -1.56763200 | -0.13945100 |
| C  | 6.66913600  | -2.18277500 | -1.22661100 |

|   |             |             |             |
|---|-------------|-------------|-------------|
| H | 6.21919800  | -2.19275600 | -2.23535800 |
| C | -0.51754400 | -1.72099500 | -1.42311700 |
| H | -0.47559700 | -0.83920600 | -2.07378500 |
| H | -0.08667400 | -2.56990900 | -1.98095700 |
| H | -1.56948800 | -1.95332100 | -1.23048400 |
| H | -0.02625700 | -2.33908900 | 0.58049600  |
| H | 6.29620100  | -0.08128700 | -0.91821700 |
| H | 6.45888400  | -1.01452200 | 0.57193200  |
| C | 6.40263600  | -3.52877100 | -0.56882100 |
| H | 5.32985200  | -3.75145100 | -0.50691500 |
| H | 6.88570200  | -4.34325600 | -1.12437200 |
| H | 6.80624700  | -3.54131600 | 0.45585500  |
| C | 8.16451500  | -1.93707200 | -1.36342400 |
| H | 8.64882500  | -2.73063700 | -1.94741000 |
| H | 8.37683800  | -0.97758600 | -1.85404700 |
| H | 8.64271400  | -1.91729400 | -0.37240500 |

**TS5b8**

|   |             |            |             |
|---|-------------|------------|-------------|
| C | 0.83581700  | 2.83511900 | -2.14788900 |
| O | -0.47839700 | 3.19555900 | -1.66814800 |
| C | 1.18069300  | 1.62394200 | -1.26588500 |
| H | 1.62994700  | 0.79158200 | -1.82047800 |
| C | -0.93247200 | 2.17784200 | -0.91739400 |
| N | -0.11772300 | 1.20469300 | -0.70715300 |
| C | -2.28438900 | 2.39958100 | -0.37472900 |
| C | -2.40739300 | 3.69295600 | 0.44226400  |
| C | -3.06571400 | 3.60902500 | -0.87269300 |
| H | -1.48594300 | 4.26116200 | 0.54295600  |
| H | -2.99326700 | 3.60378900 | 1.35245400  |
| H | -2.63319600 | 4.14578200 | -1.71167800 |
| H | -4.14418400 | 3.47924000 | -0.89885300 |
| C | -4.91075800 | 0.33398200 | 0.95693500  |
| O | -4.26989000 | 1.58219100 | 0.63236000  |



|   |             |             |             |
|---|-------------|-------------|-------------|
| C | -3.76383400 | -0.69393100 | 0.88440500  |
| H | -3.34641500 | -0.98124800 | 1.86082500  |
| C | -3.06387000 | 1.25340800  | 0.12219300  |
| N | -2.71146900 | 0.02724100  | 0.14328600  |
| C | 3.30543100  | 4.23056700  | 0.29123100  |
| C | 3.79087900  | 3.62323500  | 1.44499700  |
| C | 3.43755700  | 2.31146400  | 1.76011400  |
| C | 2.59300000  | 1.58800300  | 0.92598500  |
| C | 2.11136400  | 2.19617400  | -0.22611200 |
| C | 2.46132500  | 3.50784400  | -0.54326200 |
| H | 3.57770800  | 5.25788100  | 0.04994000  |
| H | 4.44643700  | 4.17998400  | 2.11248100  |
| H | 3.81267400  | 1.85338300  | 2.67317000  |
| H | 2.30411100  | 0.56901800  | 1.18256800  |
| C | 1.84038400  | 3.93962600  | -1.84293200 |
| H | 1.34289400  | 4.91752700  | -1.79606400 |
| H | 2.58665900  | 4.00347100  | -2.64879400 |
| C | -3.82876200 | -3.13150000 | -0.01594200 |
| C | -4.34974100 | -1.85230800 | 0.13334600  |
| C | -5.57312500 | -1.50121800 | -0.43673100 |
| C | -6.28702800 | -2.42873300 | -1.18493600 |
| C | -5.76057400 | -3.70701100 | -1.35413700 |
| C | -4.54329800 | -4.05802100 | -0.77139900 |
| H | -2.89453500 | -3.40145600 | 0.47876500  |
| H | -7.24820000 | -2.16522300 | -1.62643100 |
| H | -6.31245800 | -4.44436200 | -1.93512400 |
| H | -4.15744700 | -5.06859800 | -0.89456600 |
| C | -5.94013000 | -0.07904000 | -0.10866300 |
| H | -5.84071900 | 0.58030000  | -0.98455900 |
| H | -5.34806900 | 0.44916500  | 1.95238400  |
| H | -6.97439100 | 0.02400000  | 0.24503200  |
| H | 0.73004200  | 2.61159700  | -3.21670300 |
| C | -0.62464200 | 1.04139300  | 2.19812100  |

|    |             |             |             |
|----|-------------|-------------|-------------|
| N  | -0.85998600 | 1.93124200  | 2.92039600  |
| Cu | -0.45916900 | -0.26805800 | 0.71897600  |
| C  | -0.79957700 | -1.85491100 | 1.63660000  |
| N  | -1.18859700 | -2.65932600 | 2.39286300  |
| C  | 4.36865400  | -1.55793100 | -0.07481000 |
| C  | 3.68812200  | -1.36105500 | -1.27744800 |
| C  | 2.31064800  | -1.52155900 | -1.36009900 |
| C  | 1.56056500  | -1.88287100 | -0.23396500 |
| C  | 2.24898600  | -2.11193400 | 0.96735000  |
| C  | 3.62367500  | -1.95051300 | 1.04067100  |
| H  | 4.25104000  | -1.07320500 | -2.16715400 |
| H  | 1.81326800  | -1.38594600 | -2.32031900 |
| H  | 1.68455700  | -2.39616200 | 1.85578700  |
| H  | 4.13532300  | -2.12275300 | 1.98847700  |
| C  | 5.85744000  | -1.38323000 | -0.00437600 |
| C  | 0.09475200  | -2.10242400 | -0.31377300 |
| C  | 6.64738600  | -2.53271000 | -0.64640200 |
| H  | 6.31827400  | -2.61984900 | -1.69726500 |
| C  | -0.64656600 | -1.87249400 | -1.60294100 |
| H  | -0.44895300 | -0.89476000 | -2.05566100 |
| H  | -0.35823700 | -2.66087000 | -2.31838500 |
| H  | -1.72801600 | -1.95117600 | -1.44401900 |
| H  | -0.15789100 | -3.08871300 | 0.07579700  |
| H  | 6.17276500  | -1.28896200 | 1.04811700  |
| H  | 6.14007800  | -0.43965100 | -0.49825800 |
| C  | 6.37099000  | -3.85496600 | 0.05425500  |
| H  | 5.30969000  | -4.13082700 | 0.00940100  |
| H  | 6.95138200  | -4.67080300 | -0.39606300 |
| H  | 6.65545300  | -3.79264700 | 1.11638900  |
| C  | 8.13503200  | -2.21391100 | -0.62822900 |
| H  | 8.72081400  | -3.00974500 | -1.10651300 |
| H  | 8.35627900  | -1.27151600 | -1.14715300 |
| H  | 8.49419500  | -2.11601300 | 0.40739900  |

**6c**

|   |             |             |             |
|---|-------------|-------------|-------------|
| C | -2.31240100 | -3.15312800 | -2.16039800 |
| O | -1.23233800 | -3.74991000 | -1.39671800 |
| C | -2.64907100 | -1.87351500 | -1.35814300 |
| H | -2.59685000 | -0.93790400 | -1.93076500 |
| C | -0.92625100 | -2.89606700 | -0.40283400 |
| N | -1.61868300 | -1.82644400 | -0.30459500 |
| C | 0.21687100  | -3.31920000 | 0.43389500  |
| C | 0.43428400  | -4.82306700 | 0.59263700  |
| C | 1.34379300  | -4.06566600 | -0.28373800 |
| H | -0.32152600 | -5.45553800 | 0.13565900  |
| H | 0.79855800  | -5.14168600 | 1.56551800  |
| H | 1.22750900  | -4.16394500 | -1.36002500 |
| H | 2.35026100  | -3.85401100 | 0.06824500  |
| C | 1.82570700  | -2.03299400 | 3.42144000  |
| O | 1.68869500  | -2.89820100 | 2.26067400  |
| C | 0.82364200  | -0.89765200 | 3.11505700  |
| H | 0.14128300  | -0.66226100 | 3.94236500  |
| C | 0.60584200  | -2.47380800 | 1.57932300  |
| N | 0.03373600  | -1.40767500 | 1.98633700  |
| C | -5.74825300 | -3.81627700 | -0.77898800 |
| C | -6.49292900 | -3.00381300 | 0.07098100  |
| C | -6.00652900 | -1.75995000 | 0.47445300  |
| C | -4.76493900 | -1.30829700 | 0.03833000  |
| C | -4.02105200 | -2.13151300 | -0.79990400 |
| C | -4.50477400 | -3.37138600 | -1.21286500 |
| H | -6.13505100 | -4.78391100 | -1.09889000 |
| H | -7.46736800 | -3.34106200 | 0.42123900  |
| H | -6.60180900 | -1.13428000 | 1.13683900  |
| H | -4.37902400 | -0.33842800 | 0.35357700  |
| C | -3.55062300 | -4.05168300 | -2.15669300 |
| H | -3.28263800 | -5.07294700 | -1.85278500 |

|    |             |             |             |
|----|-------------|-------------|-------------|
| H  | -3.97171400 | -4.12832100 | -3.16955900 |
| C  | 1.30044300  | 1.48262800  | 2.18637000  |
| C  | 1.69681400  | 0.26372500  | 2.72318000  |
| C  | 3.04276900  | -0.03425900 | 2.92694200  |
| C  | 4.01895300  | 0.90328100  | 2.61284000  |
| C  | 3.62972200  | 2.12308900  | 2.06739900  |
| C  | 2.28203700  | 2.40992000  | 1.84823900  |
| H  | 0.24586200  | 1.70998900  | 2.02362300  |
| H  | 5.07516800  | 0.67893600  | 2.76959600  |
| H  | 4.38871800  | 2.85555300  | 1.79449700  |
| H  | 1.97812000  | 3.35694700  | 1.40787400  |
| C  | 3.22257500  | -1.41916600 | 3.48738200  |
| H  | 3.94015000  | -2.03120900 | 2.92147900  |
| H  | 1.57197300  | -2.64617100 | 4.29374200  |
| H  | 3.58002800  | -1.40071300 | 4.52738800  |
| H  | -1.91218100 | -2.97009700 | -3.16425900 |
| C  | -2.65973000 | 1.04589500  | 1.80699400  |
| N  | -3.30477500 | 1.98805100  | 2.07264000  |
| Cu | -1.62415800 | -0.41477200 | 1.22119100  |
| C  | 5.22471200  | 0.74822900  | -1.02231600 |
| C  | 4.46577400  | 1.54411100  | -1.87975500 |
| C  | 3.10619900  | 1.31593300  | -2.06201700 |
| C  | 2.46667900  | 0.28713500  | -1.37171900 |
| C  | 3.22215700  | -0.51816700 | -0.51896100 |
| C  | 4.58097700  | -0.29509200 | -0.35437400 |
| H  | 4.95112000  | 2.36298500  | -2.41313300 |
| H  | 2.53319800  | 1.94910600  | -2.73894200 |
| H  | 2.73002200  | -1.31399500 | 0.04660400  |
| H  | 5.15312200  | -0.92150100 | 0.33391600  |
| C  | 6.69277200  | 0.98763400  | -0.81493300 |
| C  | 1.00200100  | -0.03525600 | -1.57626700 |
| H  | 0.63264100  | -0.54996400 | -0.67820000 |
| C  | 0.16489200  | 1.20581900  | -1.75713800 |

|   |             |             |             |
|---|-------------|-------------|-------------|
| C | 7.59838400  | -0.02880900 | -1.52264100 |
| H | 7.31295100  | -1.03546900 | -1.16833400 |
| O | -0.49667400 | 1.48001500  | -0.57508200 |
| N | -1.38184400 | 2.51659000  | -0.67599600 |
| O | 0.04324500  | 1.86086600  | -2.75106700 |
| C | -2.69918300 | 2.27598500  | -1.10352300 |
| C | -1.23523600 | 3.67930000  | 0.10388500  |
| O | -0.24234500 | 4.01537100  | 0.69659200  |
| O | -3.08027100 | 1.27360300  | -1.65664600 |
| C | -2.55217700 | 4.34620800  | -0.02878900 |
| C | -3.41533800 | 3.52037200  | -0.74559500 |
| C | -4.72126100 | 3.88628100  | -0.99918600 |
| C | -5.14689100 | 5.12166200  | -0.50680200 |
| C | -4.28305600 | 5.94800900  | 0.21102000  |
| C | -2.96279500 | 5.56836600  | 0.46151700  |
| H | -5.38720400 | 3.22599600  | -1.55075400 |
| H | -6.17217000 | 5.44363900  | -0.67865400 |
| H | -4.64837500 | 6.90121500  | 0.58829800  |
| H | -2.28065500 | 6.19651900  | 1.03043300  |
| C | 0.81065200  | -0.93232200 | -2.79960800 |
| H | -0.24719200 | -1.19566400 | -2.94078700 |
| H | 1.15493800  | -0.41836900 | -3.70502800 |
| H | 1.39471400  | -1.85416000 | -2.68073400 |
| H | 6.91773100  | 0.96865600  | 0.26508400  |
| H | 6.96111600  | 1.99757700  | -1.16828800 |
| C | 7.40859900  | 0.01992500  | -3.03168900 |
| H | 6.37391400  | -0.20260600 | -3.32170800 |
| H | 7.65458200  | 1.02244900  | -3.41581700 |
| H | 8.06592900  | -0.69900200 | -3.53834000 |
| C | 9.05331200  | 0.22145500  | -1.15433300 |
| H | 9.21347800  | 0.16931200  | -0.06884900 |
| H | 9.71971200  | -0.50986000 | -1.63043800 |
| H | 9.36757700  | 1.22174300  | -1.48899600 |

**TS5c**

|   |            |             |             |
|---|------------|-------------|-------------|
| C | 3.27483400 | -0.08588000 | 2.95060400  |
| O | 2.89950300 | -1.46059500 | 2.66511300  |
| C | 3.19508700 | 0.57592400  | 1.56298500  |
| H | 2.66563400 | 1.53456100  | 1.55313300  |
| C | 2.41510200 | -1.48006800 | 1.40406600  |
| N | 2.45815000 | -0.39356600 | 0.73507300  |
| C | 1.91223400 | -2.80121100 | 0.97257000  |
| C | 2.59599400 | -4.01729300 | 1.59392900  |
| C | 1.23317800 | -3.67075600 | 2.03298800  |
| H | 3.42574900 | -3.79619400 | 2.25877500  |
| H | 2.72771500 | -4.86832400 | 0.93224100  |
| H | 1.10293000 | -3.20912800 | 3.00884300  |
| H | 0.40233600 | -4.27705000 | 1.68103200  |
| C | 0.75293200 | -4.21365700 | -2.15919900 |
| O | 1.11646100 | -4.22741600 | -0.75547500 |
| C | 0.67502000 | -2.70252700 | -2.47680400 |
| H | 1.24873400 | -2.38910900 | -3.35937800 |
| C | 1.42053400 | -2.95954100 | -0.41045300 |
| N | 1.24567800 | -2.05394200 | -1.29111300 |
| C | 6.86613700 | 0.30241000  | 1.96374900  |
| C | 7.36369700 | 0.64833500  | 0.71067200  |
| C | 6.49921800 | 0.99987100  | -0.32644600 |
| C | 5.12192400 | 1.01786900  | -0.12801500 |
| C | 4.63282400 | 0.67724500  | 1.12779000  |
| C | 5.49109800 | 0.31510400  | 2.16519400  |
| H | 7.54362200 | 0.01970900  | 2.76969300  |
| H | 8.43859700 | 0.63736700  | 0.53603800  |
| H | 6.90262500 | 1.25599600  | -1.30435100 |
| H | 4.44125300 | 1.27510000  | -0.93918300 |
| C | 4.72448100 | -0.00942300 | 3.41933700  |
| H | 5.03346000 | -0.94740700 | 3.90021600  |

|    |             |             |             |
|----|-------------|-------------|-------------|
| H  | 4.83113300  | 0.78209700  | 4.17608100  |
| C  | -1.42598000 | -1.20186300 | -2.75744900 |
| C  | -0.80055000 | -2.43125000 | -2.59883700 |
| C  | -1.53892300 | -3.60894900 | -2.49084400 |
| C  | -2.92733100 | -3.56937700 | -2.54907000 |
| C  | -3.55903600 | -2.33909100 | -2.71441700 |
| C  | -2.81583500 | -1.16206500 | -2.81271700 |
| H  | -0.84456200 | -0.28205800 | -2.82237000 |
| H  | -3.51288200 | -4.48533500 | -2.47006100 |
| H  | -4.64657800 | -2.29560600 | -2.76387000 |
| H  | -3.31569900 | -0.20040800 | -2.90915900 |
| C  | -0.63906700 | -4.80838500 | -2.36424100 |
| H  | -0.90240200 | -5.47690800 | -1.53354600 |
| H  | 1.54470300  | -4.75282100 | -2.69093400 |
| H  | -0.65799200 | -5.42110100 | -3.27744100 |
| H  | 2.54695900  | 0.29507300  | 3.67829600  |
| C  | 2.53220200  | 0.42525500  | -2.82605300 |
| N  | 3.14124700  | 0.58945400  | -3.81136900 |
| Cu | 1.53087700  | 0.07357200  | -1.23283200 |
| C  | -5.25671700 | 0.52585100  | 1.29541000  |
| C  | -4.54761800 | 1.07787300  | 2.36211200  |
| C  | -3.20753800 | 0.77096700  | 2.56970900  |
| C  | -2.54690400 | -0.11397000 | 1.71859500  |
| C  | -3.24686900 | -0.65950100 | 0.64088000  |
| C  | -4.58143000 | -0.34543200 | 0.43658600  |
| H  | -5.05643300 | 1.76531800  | 3.03977200  |
| H  | -2.67266800 | 1.23245400  | 3.39923700  |
| H  | -2.73092800 | -1.32769600 | -0.05169700 |
| H  | -5.11159900 | -0.77744500 | -0.41454600 |
| C  | -6.71247900 | 0.82552100  | 1.08098500  |
| C  | -1.07801200 | -0.42686000 | 1.88290500  |
| H  | -0.86958400 | -1.36767400 | 1.35120300  |
| C  | -0.32146100 | 0.69604800  | 1.14361300  |

|   |             |             |             |
|---|-------------|-------------|-------------|
| C | -7.64956000 | -0.31199800 | 1.51020700  |
| H | -7.35219700 | -1.21776100 | 0.95238600  |
| O | -0.23836800 | 0.35854500  | -0.12425800 |
| N | 0.22531700  | 1.84101100  | -1.15030500 |
| O | 0.05783200  | 1.71864600  | 1.66669300  |
| C | 1.12039100  | 2.85012100  | -0.73571300 |
| C | -1.06655700 | 2.36830300  | -1.40624600 |
| O | -2.07452200 | 1.74629300  | -1.62808000 |
| O | 2.26071800  | 2.68651600  | -0.37578500 |
| C | -0.89298700 | 3.84293100  | -1.37684800 |
| C | 0.40332100  | 4.12862700  | -0.96648700 |
| C | 0.86659100  | 5.42708500  | -0.86752500 |
| C | -0.03653200 | 6.44595600  | -1.17360600 |
| C | -1.34233600 | 6.15976100  | -1.58007400 |
| C | -1.79075000 | 4.84360900  | -1.69745900 |
| H | 1.88881900  | 5.63349700  | -0.55813300 |
| H | 0.27972900  | 7.48433800  | -1.09504500 |
| H | -2.01876400 | 6.98060900  | -1.81050900 |
| H | -2.80082000 | 4.60288600  | -2.02221900 |
| C | -0.58044600 | -0.51897800 | 3.31642600  |
| H | 0.46192500  | -0.86697600 | 3.34368100  |
| H | -0.61223700 | 0.45852400  | 3.81006900  |
| H | -1.19553300 | -1.22602100 | 3.88678200  |
| H | -6.89089000 | 1.04362700  | 0.01563500  |
| H | -6.99451600 | 1.73604900  | 1.63645500  |
| C | -7.52469800 | -0.60333200 | 2.99849400  |
| H | -6.50468500 | -0.90011000 | 3.27353000  |
| H | -7.78234700 | 0.29173100  | 3.58662300  |
| H | -8.20689900 | -1.40763400 | 3.30415900  |
| C | -9.08696200 | 0.03194800  | 1.14847300  |
| H | -9.20095100 | 0.22599100  | 0.07338400  |
| H | -9.77487500 | -0.77930800 | 1.42104400  |
| H | -9.41239800 | 0.93571000  | 1.68591600  |



**7c**

|   |            |             |             |
|---|------------|-------------|-------------|
| C | 3.34045900 | 2.10147300  | 2.27656400  |
| O | 3.94598100 | 0.77696800  | 2.19820100  |
| C | 2.64572100 | 2.23121900  | 0.90833900  |
| H | 1.62260200 | 2.61695400  | 0.94898700  |
| C | 3.39330700 | 0.17518600  | 1.13084000  |
| N | 2.62234400 | 0.85731000  | 0.38218900  |
| C | 3.80364800 | -1.22832900 | 0.92890600  |
| C | 5.23891900 | -1.57215400 | 1.30887200  |
| C | 4.14403100 | -2.06026700 | 2.16636200  |
| H | 5.83399300 | -0.73338000 | 1.65886200  |
| H | 5.74759000 | -2.27863600 | 0.65940900  |
| H | 3.96088400 | -1.56700800 | 3.11709800  |
| H | 3.87320100 | -3.11213800 | 2.11759800  |
| C | 3.16306200 | -3.64806200 | -1.69978200 |
| O | 3.83190600 | -3.10655800 | -0.52495200 |
| C | 1.83108100 | -2.87444000 | -1.70631400 |
| H | 1.52637300 | -2.50235500 | -2.69334300 |
| C | 3.20044300 | -1.97954200 | -0.18273200 |
| N | 2.12227400 | -1.72616000 | -0.83060600 |
| C | 5.58693200 | 4.41808900  | 0.37250800  |
| C | 5.53951000 | 4.70979900  | -0.98781900 |
| C | 4.51831500 | 4.19921300  | -1.78993400 |
| C | 3.52637100 | 3.38966100  | -1.24462300 |
| C | 3.57990700 | 3.10224900  | 0.11349400  |
| C | 4.59936600 | 3.60709600  | 0.91909100  |
| H | 6.38787700 | 4.81619700  | 0.99596700  |
| H | 6.30908200 | 5.34022900  | -1.43112400 |
| H | 4.49869300 | 4.43323000  | -2.85296100 |
| H | 2.72881000 | 2.97855300  | -1.86287300 |
| C | 4.42291800 | 3.17308700  | 2.34998000  |
| H | 5.33828500 | 2.78124200  | 2.81394800  |

|    |             |             |             |
|----|-------------|-------------|-------------|
| H  | 4.08082800  | 4.00532600  | 2.98308200  |
| C  | -0.46104900 | -3.62419600 | -0.69880900 |
| C  | 0.85410500  | -3.84990100 | -1.09165900 |
| C  | 1.44818700  | -5.10219000 | -0.93269400 |
| C  | 0.73924200  | -6.15196000 | -0.36161300 |
| C  | -0.57287100 | -5.93078400 | 0.04275800  |
| C  | -1.16644400 | -4.68016700 | -0.12972600 |
| H  | -0.92845900 | -2.64904700 | -0.83536500 |
| H  | 1.20232500  | -7.13027300 | -0.23462400 |
| H  | -1.14324700 | -6.74184500 | 0.49274200  |
| H  | -2.20063700 | -4.53068400 | 0.17821400  |
| C  | 2.84699200  | -5.11927000 | -1.48284200 |
| H  | 3.58676300  | -5.58703600 | -0.81981300 |
| H  | 3.82045700  | -3.44216400 | -2.55188300 |
| H  | 2.89629700  | -5.65680600 | -2.44128800 |
| H  | 2.65631400  | 2.08075000  | 3.13157100  |
| C  | 1.44629300  | 0.39670300  | -2.38357300 |
| N  | 1.82761300  | 0.69642700  | -3.44501200 |
| Cu | 0.91315100  | -0.16960400 | -0.68053200 |
| C  | -5.08682900 | 0.20081400  | 0.57616400  |
| C  | -4.38048900 | 1.15960600  | 1.30521200  |
| C  | -3.19342600 | 0.83947000  | 1.95249400  |
| C  | -2.68217900 | -0.46052000 | 1.90254300  |
| C  | -3.35974000 | -1.40622800 | 1.13209700  |
| C  | -4.54439100 | -1.08275100 | 0.48301600  |
| H  | -4.77017400 | 2.17800000  | 1.35936100  |
| H  | -2.65121100 | 1.60925000  | 2.50113700  |
| H  | -2.94466800 | -2.41174500 | 1.04440800  |
| H  | -5.06192000 | -1.83932200 | -0.10999500 |
| C  | -6.41151500 | 0.51563000  | -0.05770900 |
| C  | -1.40163600 | -0.82590900 | 2.61926600  |
| H  | -1.26829300 | -1.91406400 | 2.53870400  |
| C  | -0.26979600 | -0.16032400 | 1.81796800  |

|   |             |             |             |
|---|-------------|-------------|-------------|
| C | -7.61719800 | -0.01840300 | 0.72806500  |
| H | -7.48717400 | -1.10980700 | 0.83653300  |
| O | 0.11940600  | -0.92751500 | 0.84559000  |
| N | -0.59258500 | 0.90260500  | -0.99157800 |
| O | 0.11983100  | 0.96587700  | 2.08251500  |
| C | -0.71515100 | 2.28695900  | -0.94233200 |
| C | -1.68087400 | 0.29535600  | -1.60310700 |
| O | -1.76786200 | -0.87706000 | -1.90687600 |
| O | 0.13033800  | 3.08904200  | -0.61593900 |
| C | -2.68259600 | 1.37646600  | -1.81401900 |
| C | -2.10926500 | 2.57279500  | -1.39928500 |
| C | -2.80256300 | 3.76582900  | -1.45348500 |
| C | -4.10742200 | 3.72189000  | -1.95114400 |
| C | -4.67862500 | 2.52168500  | -2.37790100 |
| C | -3.96913400 | 1.32049300  | -2.31063500 |
| H | -2.34071300 | 4.69529300  | -1.12625900 |
| H | -4.68821500 | 4.64030400  | -2.01718600 |
| H | -5.69644100 | 2.52329700  | -2.76545500 |
| H | -4.40146800 | 0.37327300  | -2.62988200 |
| C | -1.37354600 | -0.39845000 | 4.07817500  |
| H | -0.45358300 | -0.74384000 | 4.56642200  |
| H | -1.39807200 | 0.69287600  | 4.16763900  |
| H | -2.23098100 | -0.81611300 | 4.62023200  |
| H | -6.44806000 | 0.09473500  | -1.07696400 |
| H | -6.52383200 | 1.60823000  | -0.16824300 |
| C | -7.69301000 | 0.59635500  | 2.11789800  |
| H | -6.79649500 | 0.37855500  | 2.71171800  |
| H | -7.78871800 | 1.69147600  | 2.04713500  |
| H | -8.56584100 | 0.22274600  | 2.66959700  |
| C | -8.90080000 | 0.24413200  | -0.04591100 |
| H | -8.87426100 | -0.21124700 | -1.04528900 |
| H | -9.77738300 | -0.15239400 | 0.48323900  |
| H | -9.05578700 | 1.32612900  | -0.17670100 |

**6d**

|   |             |             |             |
|---|-------------|-------------|-------------|
| C | 3.56771700  | -3.00932700 | 1.70849200  |
| O | 2.21774800  | -3.45817000 | 2.00060000  |
| C | 3.33402200  | -1.89635000 | 0.66018500  |
| H | 3.87920500  | -0.96307500 | 0.85572600  |
| C | 1.38839600  | -2.53970000 | 1.46597700  |
| N | 1.88834400  | -1.61854800 | 0.73581900  |
| C | -0.04465600 | -2.73504200 | 1.78518800  |
| C | -0.61790300 | -4.11779500 | 1.48647900  |
| C | -0.39986900 | -3.71999600 | 2.89132100  |
| H | 0.07728000  | -4.82168900 | 1.03455400  |
| H | -1.63435100 | -4.14301400 | 1.10133700  |
| H | 0.44158700  | -4.14533100 | 3.42993800  |
| H | -1.26828700 | -3.46069200 | 3.49148900  |
| C | -2.92582500 | -0.56573100 | 1.91467200  |
| O | -2.25625600 | -1.84537800 | 1.81990200  |
| C | -1.86176800 | 0.43961000  | 1.42918700  |
| H | -2.01455700 | 0.81530500  | 0.40720200  |
| C | -0.94771900 | -1.57642300 | 1.64619100  |
| N | -0.62209400 | -0.35785000 | 1.43369500  |
| C | 4.65051800  | -4.61250200 | -1.49930000 |
| C | 4.50950500  | -4.11345800 | -2.79042300 |
| C | 3.99057900  | -2.83591400 | -3.00229500 |
| C | 3.59583700  | -2.04360300 | -1.92823100 |
| C | 3.72299800  | -2.55235700 | -0.64095500 |
| C | 4.25611700  | -3.82257700 | -0.42523500 |
| H | 5.06629100  | -5.60638000 | -1.33285300 |
| H | 4.81336800  | -4.72162800 | -3.64114000 |
| H | 3.89766500  | -2.45275500 | -4.01768100 |
| H | 3.20091600  | -1.03880900 | -2.07609100 |
| C | 4.36332900  | -4.12636300 | 1.04342500  |
| H | 3.96995000  | -5.11195000 | 1.32668200  |

|    |             |             |             |
|----|-------------|-------------|-------------|
| H  | 5.41008200  | -4.09634200 | 1.37995900  |
| C  | -1.14857600 | 2.71207500  | 2.45318100  |
| C  | -1.85091000 | 1.51404400  | 2.47333700  |
| C  | -2.63659900 | 1.15242100  | 3.56546700  |
| C  | -2.74665400 | 2.00510100  | 4.65692700  |
| C  | -2.04793300 | 3.20950800  | 4.64168700  |
| C  | -1.25148400 | 3.55990800  | 3.55156400  |
| H  | -0.52321400 | 2.97272700  | 1.59870300  |
| H  | -3.36469300 | 1.73619400  | 5.51349500  |
| H  | -2.12203000 | 3.88506500  | 5.49237200  |
| H  | -0.70458400 | 4.50052100  | 3.56096700  |
| C  | -3.26179900 | -0.20281700 | 3.36978900  |
| H  | -2.82549600 | -0.95395500 | 4.04653900  |
| H  | -3.80612100 | -0.62440800 | 1.26766600  |
| H  | -4.34401200 | -0.20619500 | 3.55716700  |
| H  | 3.99268500  | -2.66077800 | 2.65647500  |
| C  | 2.64779700  | 1.48785200  | 2.02004300  |
| N  | 3.60302100  | 2.06494900  | 2.37638800  |
| Cu | 1.19767300  | 0.44623700  | 1.43976800  |
| C  | -4.76776400 | -0.38619200 | -1.41081600 |
| C  | -4.00098200 | -1.52060400 | -1.14622700 |
| C  | -2.66154100 | -1.59019100 | -1.51770000 |
| C  | -2.05311000 | -0.52850100 | -2.18294600 |
| C  | -2.81947900 | 0.60874300  | -2.45491500 |
| C  | -4.15036700 | 0.68076500  | -2.06947500 |
| H  | -4.45592100 | -2.36270000 | -0.61943000 |
| H  | -2.09182600 | -2.48723600 | -1.27833500 |
| H  | -2.35678200 | 1.45588600  | -2.96540700 |
| H  | -4.72907200 | 1.57960800  | -2.28660100 |
| C  | -6.21631000 | -0.33706400 | -1.01600100 |
| C  | -0.61594300 | -0.56909400 | -2.65152100 |
| H  | -0.60533200 | -0.42897400 | -3.74421000 |
| C  | -7.14029500 | -1.14164200 | -1.94089000 |

|   |             |             |             |
|---|-------------|-------------|-------------|
| H | -6.77426900 | -2.18370000 | -1.95369900 |
| C | 0.14282500  | -1.85690100 | -2.33398400 |
| H | 1.13047000  | -1.84800400 | -2.80629500 |
| H | 0.30075500  | -1.97097000 | -1.25207700 |
| H | -0.40409000 | -2.72643900 | -2.71665100 |
| H | -6.33264000 | -0.71960300 | 0.01221600  |
| H | -6.56536100 | 0.70906300  | -0.99886800 |
| C | -7.10686100 | -0.60329600 | -3.36369800 |
| H | -6.09969200 | -0.64812500 | -3.79699700 |
| H | -7.78181800 | -1.17090600 | -4.01753600 |
| H | -7.43319100 | 0.44845100  | -3.38316300 |
| C | -8.56046000 | -1.13098200 | -1.39471500 |
| H | -9.23679900 | -1.72211300 | -2.02585400 |
| H | -8.60832800 | -1.53653500 | -0.37501200 |
| H | -8.95230000 | -0.10300900 | -1.36300400 |
| C | 0.15451600  | 0.59539300  | -2.07703800 |
| O | 1.18493100  | 0.92768300  | -2.94054400 |
| N | 1.85378800  | 2.05215800  | -2.53309200 |
| O | -0.03821300 | 1.18562000  | -1.05115000 |
| C | 2.77582400  | 1.98869000  | -1.45510500 |
| C | 1.20568000  | 3.30694000  | -2.62777400 |
| O | 0.21557800  | 3.52905900  | -3.27696800 |
| O | 3.28124100  | 0.97642500  | -1.04524600 |
| C | 2.01402700  | 4.18184200  | -1.75169400 |
| C | 2.92828300  | 3.40072100  | -1.04173000 |
| C | 3.77617000  | 3.95118700  | -0.09823400 |
| C | 3.68806800  | 5.33048100  | 0.10187200  |
| C | 2.78529200  | 6.11492400  | -0.61715500 |
| C | 1.92412100  | 5.54701100  | -1.55761100 |
| H | 4.42866300  | 3.31989500  | 0.50140300  |
| H | 4.32630400  | 5.79995300  | 0.84750800  |
| H | 2.74289000  | 7.18628800  | -0.42933100 |
| H | 1.20158500  | 6.14185100  | -2.11276800 |

**TS5d**

|   |             |             |             |
|---|-------------|-------------|-------------|
| C | 3.97980300  | -2.70369600 | -0.09825500 |
| O | 2.98150200  | -3.74148400 | -0.08837800 |
| C | 3.17072500  | -1.42381600 | -0.42448000 |
| H | 3.19377500  | -0.67991700 | 0.38351800  |
| C | 1.79060800  | -3.14538400 | -0.31306300 |
| N | 1.77659700  | -1.89458900 | -0.55355300 |
| C | 0.64755300  | -4.08048800 | -0.20472900 |
| C | 0.81996300  | -5.45408600 | -0.85356700 |
| C | 0.92248000  | -5.34982900 | 0.61127700  |
| H | 1.73188700  | -5.58153700 | -1.43149200 |
| H | -0.07677300 | -5.89113300 | -1.28543000 |
| H | 1.90205500  | -5.39291900 | 1.07496400  |
| H | 0.09440000  | -5.70832100 | 1.21427100  |
| C | -2.79136600 | -3.90666400 | 0.71478400  |
| O | -1.64553200 | -4.54696700 | 0.12313200  |
| C | -2.59000800 | -2.41848300 | 0.37532800  |
| H | -3.20723500 | -2.04973600 | -0.45424000 |
| C | -0.73098300 | -3.57290700 | -0.06747000 |
| N | -1.16387900 | -2.36634500 | -0.02611000 |
| C | 5.46872100  | -1.50631100 | -3.33759600 |
| C | 5.16107100  | -0.35541600 | -4.05504700 |
| C | 4.18224000  | 0.52163600  | -3.59047000 |
| C | 3.49089200  | 0.25404800  | -2.41252500 |
| C | 3.78060400  | -0.91208400 | -1.70711200 |
| C | 4.77691400  | -1.77651100 | -2.16251700 |
| H | 6.24787300  | -2.18405800 | -3.68706900 |
| H | 5.69561100  | -0.13193400 | -4.97702600 |
| H | 3.95971600  | 1.42948700  | -4.14863100 |
| H | 2.74050700  | 0.95460100  | -2.04765700 |
| C | 4.99850900  | -2.92506500 | -1.21904800 |
| H | 4.83649300  | -3.90565300 | -1.68839500 |

|    |             |             |             |
|----|-------------|-------------|-------------|
| H  | 6.02592000  | -2.93285700 | -0.82883000 |
| C  | -2.93539400 | -0.33004200 | 1.89025900  |
| C  | -2.84896400 | -1.69857400 | 1.66828400  |
| C  | -2.93971600 | -2.60470300 | 2.72192200  |
| C  | -3.11933500 | -2.15174500 | 4.02155700  |
| C  | -3.19305200 | -0.78119700 | 4.25111100  |
| C  | -3.10169900 | 0.12315000  | 3.19480100  |
| H  | -2.86027000 | 0.38004700  | 1.06744300  |
| H  | -3.18305500 | -2.85561700 | 4.85074200  |
| H  | -3.31844100 | -0.41183000 | 5.26751800  |
| H  | -3.15369100 | 1.19272800  | 3.38838700  |
| C  | -2.75804200 | -4.01808700 | 2.24818500  |
| H  | -1.77432900 | -4.40411800 | 2.56064100  |
| H  | -3.67990800 | -4.35767900 | 0.26420900  |
| H  | -3.51372100 | -4.71331800 | 2.63675000  |
| H  | 4.42936200  | -2.69513400 | 0.89971800  |
| C  | 0.52605600  | -1.23149000 | 2.08008900  |
| N  | 0.84877000  | -1.89018000 | 2.99182100  |
| Cu | -0.06654900 | -0.66037700 | 0.28480100  |
| C  | -4.72152700 | 1.61354800  | -1.17154100 |
| C  | -4.28534500 | 0.41078500  | -1.73265800 |
| C  | -2.93495800 | 0.09817500  | -1.80173300 |
| C  | -1.96100900 | 0.97388300  | -1.30339900 |
| C  | -2.39881400 | 2.19704200  | -0.77555300 |
| C  | -3.75151300 | 2.50199200  | -0.70440100 |
| H  | -5.02290400 | -0.29219700 | -2.12562700 |
| H  | -2.62872500 | -0.84215000 | -2.25933400 |
| H  | -1.66268200 | 2.91071300  | -0.41027400 |
| H  | -4.06600900 | 3.45898500  | -0.28504300 |
| C  | -6.18409100 | 1.94960400  | -1.13116900 |
| C  | -0.51005300 | 0.67596800  | -1.39695900 |
| H  | 0.03670200  | 1.61413100  | -1.55100300 |
| C  | -6.76124500 | 2.37491900  | -2.48887800 |



|   |             |             |             |
|---|-------------|-------------|-------------|
| H | -6.57172700 | 1.55511600  | -3.20447700 |
| C | -0.07912600 | -0.28988600 | -2.48414500 |
| H | 1.00761100  | -0.39935600 | -2.51804800 |
| H | -0.50071400 | -1.29553300 | -2.37827100 |
| H | -0.40914300 | 0.12002400  | -3.45299200 |
| H | -6.75315700 | 1.07965100  | -0.76536900 |
| H | -6.36144600 | 2.76307600  | -0.40768600 |
| C | -6.08400800 | 3.63328800  | -3.01155200 |
| H | -5.00460400 | 3.49175500  | -3.14937500 |
| H | -6.51112800 | 3.94236600  | -3.97468800 |
| H | -6.22436000 | 4.46558400  | -2.30385800 |
| C | -8.26442100 | 2.58123400  | -2.37351000 |
| H | -8.70640600 | 2.85976400  | -3.33924900 |
| H | -8.77368000 | 1.67594600  | -2.01622400 |
| H | -8.48738200 | 3.39094400  | -1.66213700 |
| C | 0.44387900  | 1.14998500  | 0.45507900  |
| O | 1.79032400  | 1.20958000  | 0.04200700  |
| N | 2.40942000  | 2.36098100  | 0.44620400  |
| O | -0.05869600 | 2.01264000  | 1.10805900  |
| C | 2.90870200  | 2.48469300  | 1.76469200  |
| C | 2.06477800  | 3.58814100  | -0.14218100 |
| O | 1.45460200  | 3.72229000  | -1.17544700 |
| O | 3.10751000  | 1.57651400  | 2.52419800  |
| C | 2.63044700  | 4.59818900  | 0.78529600  |
| C | 3.12554200  | 3.94648700  | 1.91447800  |
| C | 3.70570000  | 4.64539100  | 2.95542500  |
| C | 3.77356600  | 6.03459700  | 2.83573300  |
| C | 3.27827700  | 6.68693700  | 1.70565500  |
| C | 2.69718600  | 5.97248900  | 0.65665600  |
| H | 4.08317100  | 4.12245000  | 3.83179900  |
| H | 4.21681300  | 6.62168700  | 3.63771300  |
| H | 3.34437700  | 7.77151000  | 1.64512100  |
| H | 2.30380500  | 6.46740100  | -0.22900700 |

**7d**

|   |             |             |             |
|---|-------------|-------------|-------------|
| C | 4.50992500  | -2.10642800 | -0.56320800 |
| O | 3.73093400  | -3.27930000 | -0.26496200 |
| C | 3.46874100  | -0.96089200 | -0.55965400 |
| H | 3.53294400  | -0.29615500 | 0.31343400  |
| C | 2.43388200  | -2.89322000 | -0.27418800 |
| N | 2.17576000  | -1.66264400 | -0.47426400 |
| C | 1.49248300  | -3.99202400 | 0.02187700  |
| C | 1.90438000  | -5.39978600 | -0.40329600 |
| C | 2.02665700  | -5.03250900 | 1.01667700  |
| H | 2.80782300  | -5.45680400 | -1.00421600 |
| H | 1.09335700  | -6.05838800 | -0.70203000 |
| H | 3.00879800  | -4.81266700 | 1.42324000  |
| H | 1.29885000  | -5.41808300 | 1.72427600  |
| C | -1.93639800 | -4.35642600 | 0.95975100  |
| O | -0.67339100 | -4.82735000 | 0.44860100  |
| C | -1.99532200 | -2.89021200 | 0.48949900  |
| H | -2.65670700 | -2.70889200 | -0.36788000 |
| C | 0.04702200  | -3.72995200 | 0.14741700  |
| N | -0.59627900 | -2.62233200 | 0.07544200  |
| C | 4.98714700  | -0.43263100 | -3.89845600 |
| C | 4.42170100  | 0.75876200  | -4.34312600 |
| C | 3.51322400  | 1.45233200  | -3.54414700 |
| C | 3.15548000  | 0.96180400  | -2.29234200 |
| C | 3.71007000  | -0.23672500 | -1.85679500 |
| C | 4.62523300  | -0.92707500 | -2.65046300 |
| H | 5.70728300  | -0.96738700 | -4.51798900 |
| H | 4.69780700  | 1.15620600  | -5.31865400 |
| H | 3.08222000  | 2.38900200  | -3.89378400 |
| H | 2.45106900  | 1.50797400  | -1.66771200 |
| C | 5.11982400  | -2.17357000 | -1.97079400 |
| H | 4.77507400  | -3.08756400 | -2.47654800 |

|    |             |             |             |
|----|-------------|-------------|-------------|
| H  | 6.21652700  | -2.22796500 | -1.94233800 |
| C  | -2.70235900 | -0.76755700 | 1.81587000  |
| C  | -2.39332300 | -2.11795300 | 1.71493600  |
| C  | -2.35160300 | -2.93235000 | 2.84355300  |
| C  | -2.62016900 | -2.40333800 | 4.09820600  |
| C  | -2.91406300 | -1.04718900 | 4.20705200  |
| C  | -2.95448300 | -0.23486200 | 3.07577700  |
| H  | -2.73161500 | -0.12875500 | 0.93455200  |
| H  | -2.58036900 | -3.03346500 | 4.98609100  |
| H  | -3.10868700 | -0.61608100 | 5.18764600  |
| H  | -3.17392000 | 0.82663100  | 3.17300200  |
| C  | -1.93944100 | -4.33394400 | 2.49687900  |
| H  | -0.92199500 | -4.53942400 | 2.86543700  |
| H  | -2.71142900 | -4.99854000 | 0.53199600  |
| H  | -2.59690900 | -5.10220800 | 2.92492700  |
| H  | 5.26533800  | -2.02064100 | 0.22361600  |
| C  | 0.77051200  | -1.26389500 | 2.14676300  |
| N  | 1.11236300  | -1.87201300 | 3.08613700  |
| Cu | 0.17858500  | -0.74142000 | 0.31479200  |
| C  | -4.69172400 | 0.80110800  | -1.36383700 |
| C  | -4.15520800 | -0.40079300 | -1.83418900 |
| C  | -2.78445300 | -0.60657000 | -1.87780400 |
| C  | -1.88301800 | 0.37728200  | -1.43927100 |
| C  | -2.42643200 | 1.59434000  | -0.99840000 |
| C  | -3.79934600 | 1.79508200  | -0.95790900 |
| H  | -4.83103100 | -1.18705600 | -2.17712400 |
| H  | -2.39965500 | -1.54887100 | -2.26734200 |
| H  | -1.75575700 | 2.38909800  | -0.67861000 |
| H  | -4.19310100 | 2.75114600  | -0.60896000 |
| C  | -6.17644200 | 1.02177500  | -1.35425600 |
| C  | -0.42261900 | 0.17508200  | -1.48836900 |
| H  | 0.09791500  | 1.13648900  | -1.56166400 |
| C  | -6.77222600 | 1.30069600  | -2.74160500 |

|   |             |             |             |
|---|-------------|-------------|-------------|
| H | -6.51323300 | 0.44809700  | -3.39430800 |
| C | 0.08587700  | -0.78209100 | -2.54335400 |
| H | 1.17707300  | -0.77251300 | -2.60110900 |
| H | -0.22542100 | -1.82078500 | -2.37742900 |
| H | -0.30661300 | -0.46598500 | -3.52471000 |
| H | -6.67940300 | 0.13835400  | -0.92846200 |
| H | -6.42476900 | 1.86911100  | -0.69305700 |
| C | -6.18902700 | 2.56612700  | -3.35310700 |
| H | -5.10065400 | 2.49841600  | -3.47531200 |
| H | -6.62937100 | 2.76991700  | -4.33816600 |
| H | -6.39970100 | 3.43471500  | -2.70922800 |
| C | -8.28782100 | 1.39788700  | -2.64732800 |
| H | -8.74111900 | 1.57066000  | -3.63240400 |
| H | -8.72926300 | 0.48424400  | -2.22664600 |
| H | -8.57883000 | 2.23739700  | -1.99771500 |
| C | 0.35318000  | 1.08738200  | 0.79342300  |
| O | 1.69530100  | 1.44240500  | 0.56511500  |
| N | 1.94143300  | 2.76171200  | 0.86362200  |
| O | -0.42445100 | 1.85066700  | 1.27459100  |
| C | 2.09143200  | 3.19420700  | 2.20608900  |
| C | 1.45288600  | 3.76615200  | 0.01161500  |
| O | 1.05202500  | 3.59795800  | -1.11560300 |
| O | 2.30644700  | 2.49212500  | 3.15472600  |
| C | 1.56576900  | 5.00750300  | 0.81360200  |
| C | 1.93966200  | 4.66912400  | 2.11246500  |
| C | 2.11071000  | 5.63160800  | 3.08876300  |
| C | 1.89031000  | 6.96076200  | 2.72341300  |
| C | 1.51551200  | 7.29963200  | 1.42215300  |
| C | 1.34753400  | 6.32060800  | 0.44170100  |
| H | 2.39882900  | 5.35086100  | 4.09979600  |
| H | 2.00879400  | 7.74834800  | 3.46507900  |
| H | 1.34891400  | 8.34541500  | 1.17131300  |
| H | 1.05204200  | 6.56866600  | -0.57577300 |

**7a**

|   |             |             |             |
|---|-------------|-------------|-------------|
| C | -0.49405600 | -3.68574700 | 0.20803300  |
| O | 0.05644600  | -2.89568400 | 1.28007700  |
| C | -0.96181100 | -2.62113700 | -0.80841600 |
| H | -0.53647200 | -2.76802300 | -1.81113000 |
| C | 0.04677800  | -1.60720000 | 0.89933600  |
| N | -0.45044000 | -1.35359100 | -0.25625800 |
| C | 0.63421600  | -0.69765800 | 1.89625100  |
| C | 0.52148600  | -1.13921700 | 3.34565900  |
| C | 1.83528300  | -1.23369200 | 2.68188800  |
| H | -0.03868700 | -2.05292200 | 3.51709000  |
| H | 0.34135700  | -0.33579600 | 4.05293400  |
| H | 2.20905900  | -2.20886000 | 2.37651000  |
| H | 2.59751600  | -0.49296300 | 2.91843500  |
| C | 1.08718700  | 2.84200400  | 2.27429900  |
| O | 0.86980200  | 1.50250200  | 2.74580400  |
| C | 0.62675100  | 2.79674900  | 0.79899600  |
| H | -0.36973200 | 3.22581100  | 0.61123500  |
| C | 0.64848700  | 0.75617800  | 1.64633800  |
| N | 0.55996400  | 1.35260900  | 0.52363400  |
| C | -4.24654300 | -3.96559600 | 0.23881100  |
| C | -5.15959200 | -3.19171400 | -0.47187000 |
| C | -4.72263500 | -2.20739000 | -1.35909800 |
| C | -3.36309200 | -1.97714600 | -1.54085700 |
| C | -2.45938000 | -2.73044100 | -0.80507800 |
| C | -2.88741700 | -3.72865600 | 0.06648000  |
| H | -4.59283200 | -4.74287400 | 0.91974700  |
| H | -6.22678700 | -3.36017800 | -0.33717100 |
| H | -5.44169200 | -1.60221300 | -1.90899700 |
| H | -3.02997500 | -1.19294600 | -2.22097700 |
| C | -1.72580500 | -4.46267700 | 0.67847400  |
| H | -1.75506200 | -4.49844100 | 1.77585800  |

|    |             |             |             |
|----|-------------|-------------|-------------|
| H  | -1.68118400 | -5.50524100 | 0.33192500  |
| C  | 1.74496800  | 3.90151300  | -1.28229100 |
| C  | 1.72886000  | 3.49303400  | 0.04685500  |
| C  | 2.84571500  | 3.66890700  | 0.86408300  |
| C  | 4.01080900  | 4.22718400  | 0.35218900  |
| C  | 4.04085600  | 4.61539800  | -0.98487300 |
| C  | 2.91450600  | 4.46133200  | -1.79239800 |
| H  | 0.86410100  | 3.77626500  | -1.91306000 |
| H  | 4.88515300  | 4.36706500  | 0.98829100  |
| H  | 4.94682700  | 5.05550300  | -1.39890100 |
| H  | 2.94464500  | 4.78641900  | -2.83086800 |
| C  | 2.58675300  | 3.18255100  | 2.26185700  |
| H  | 3.16233800  | 2.27146000  | 2.49259000  |
| H  | 0.49814100  | 3.50731100  | 2.91139500  |
| H  | 2.85648700  | 3.92322100  | 3.02657200  |
| H  | 0.31806700  | -4.32752400 | -0.15459400 |
| C  | -0.86066900 | 1.87231500  | -2.37017600 |
| N  | -0.95513800 | 2.81343000  | -3.05623500 |
| Cu | -0.65886500 | 0.45587300  | -1.14689500 |
| N  | -2.44834100 | 0.83145500  | -0.25235900 |
| C  | -3.60135800 | 1.06415800  | -0.98645000 |
| C  | -2.73801400 | 0.86954300  | 1.09352100  |
| O  | -1.97480000 | 0.67024900  | 2.03152100  |
| O  | -3.72080300 | 1.00181000  | -2.19732800 |
| C  | -4.19140400 | 1.19724900  | 1.24898800  |
| C  | -4.71641500 | 1.33205200  | -0.02510100 |
| C  | -6.05016100 | 1.62403700  | -0.23553000 |
| C  | -6.85250900 | 1.79276100  | 0.89560200  |
| C  | -6.32263400 | 1.66082000  | 2.18088500  |
| C  | -4.97349900 | 1.35593800  | 2.37683100  |
| H  | -6.44676600 | 1.72154700  | -1.24506500 |
| H  | -7.90859400 | 2.03117400  | 0.77746800  |
| H  | -6.97556100 | 1.79736300  | 3.04183100  |

|   |             |             |             |
|---|-------------|-------------|-------------|
| H | -4.54665400 | 1.24500900  | 3.37243000  |
| C | 4.08455000  | -1.57528300 | -0.02585800 |
| C | 3.21961400  | -2.39967900 | -0.75360200 |
| C | 2.23076900  | -1.86211800 | -1.56343500 |
| C | 2.06200400  | -0.47211900 | -1.67369400 |
| C | 2.95869400  | 0.35142600  | -0.96946200 |
| C | 3.94366000  | -0.18997200 | -0.16146800 |
| H | 3.33721600  | -3.48286100 | -0.68498400 |
| H | 1.58244500  | -2.53098300 | -2.12971500 |
| H | 2.86345400  | 1.43302600  | -1.06203000 |
| H | 4.62320900  | 0.47338300  | 0.37806900  |
| C | 5.16909000  | -2.14752500 | 0.83869900  |
| C | 1.03245700  | 0.14445100  | -2.50247200 |
| H | 1.28440000  | 1.17592900  | -2.74927500 |
| C | 6.56774300  | -2.08159800 | 0.20674100  |
| H | 6.77710100  | -1.02334600 | -0.02888600 |
| C | 0.41753400  | -0.60452800 | -3.64913100 |
| H | -0.26484200 | 0.04250500  | -4.20823700 |
| H | 1.21321800  | -0.94914200 | -4.33042700 |
| H | -0.14723100 | -1.49483400 | -3.34352200 |
| H | 5.19556100  | -1.60874400 | 1.80036200  |
| H | 4.94417800  | -3.20132300 | 1.07691800  |
| C | 7.60894000  | -2.57500900 | 1.20048100  |
| H | 7.42431600  | -3.62850400 | 1.46003700  |
| H | 8.62198500  | -2.51122600 | 0.78256300  |
| H | 7.59047900  | -1.99447800 | 2.13265600  |
| C | 6.63296800  | -2.88331000 | -1.08480300 |
| H | 6.39156900  | -3.94075000 | -0.89266400 |
| H | 5.92687900  | -2.51003200 | -1.83734200 |
| H | 7.63989300  | -2.84854800 | -1.52059300 |

**10c-R**

|   |             |            |             |
|---|-------------|------------|-------------|
| C | -3.34923100 | 1.56654800 | -0.02390800 |
|---|-------------|------------|-------------|

|   |             |             |             |
|---|-------------|-------------|-------------|
| O | -2.48075600 | 1.73535000  | -1.17858700 |
| C | -2.78797600 | 0.28547300  | 0.62941200  |
| H | -2.66664700 | 0.34545300  | 1.71800700  |
| C | -1.44680300 | 0.88793300  | -1.00450300 |
| N | -1.47276900 | 0.10733500  | -0.00025900 |
| C | -0.41753100 | 0.93439900  | -2.06210000 |
| C | -0.93724300 | 1.22219500  | -3.47449100 |
| C | -0.17356100 | 2.26373000  | -2.76956000 |
| H | -2.01552700 | 1.32894900  | -3.55051500 |
| H | -0.45564400 | 0.67219800  | -4.27740600 |
| H | -0.70325000 | 3.11501400  | -2.34942800 |
| H | 0.85421800  | 2.45052200  | -3.07369100 |
| C | 2.61162600  | -0.88898400 | -2.77025900 |
| O | 1.47238300  | -0.06325800 | -3.08821800 |
| C | 2.19181500  | -1.60411200 | -1.47889100 |
| H | 1.77443700  | -2.61313200 | -1.60363300 |
| C | 0.72663500  | 0.01038900  | -1.96975700 |
| N | 1.09756200  | -0.73398400 | -0.99241600 |
| C | -5.85621700 | -1.05595500 | -0.95363600 |
| C | -5.73132800 | -2.43386700 | -0.79927200 |
| C | -4.62561400 | -2.98129800 | -0.14800800 |
| C | -3.62540000 | -2.15960600 | 0.36194900  |
| C | -3.75544200 | -0.78594800 | 0.20134000  |
| C | -4.85664100 | -0.23243500 | -0.44967900 |
| H | -6.72084600 | -0.63245900 | -1.46496700 |
| H | -6.50370200 | -3.09194500 | -1.19466200 |
| H | -4.53692600 | -4.06082700 | -0.04349100 |
| H | -2.75128900 | -2.58220100 | 0.85628800  |
| C | -4.77689800 | 1.27059900  | -0.47097000 |
| H | -4.98270400 | 1.71594600  | -1.45369700 |
| H | -5.49014900 | 1.72214800  | 0.23478800  |
| C | 3.62668300  | -2.21954500 | 0.59050600  |
| C | 3.40430800  | -1.54691700 | -0.60435400 |



|    |             |             |             |
|----|-------------|-------------|-------------|
| C  | 4.32588400  | -0.63030800 | -1.11081200 |
| C  | 5.48680100  | -0.35117700 | -0.39959700 |
| C  | 5.70656700  | -1.00441800 | 0.81190100  |
| C  | 4.79070900  | -1.93623800 | 1.30101800  |
| H  | 2.89598000  | -2.93878600 | 0.96376600  |
| H  | 6.21676700  | 0.36272600  | -0.78033200 |
| H  | 6.61167200  | -0.79308300 | 1.37855000  |
| H  | 4.98779300  | -2.44573700 | 2.24219600  |
| C  | 3.85518300  | -0.05119700 | -2.42015500 |
| H  | 3.56173300  | 1.00765900  | -2.32449700 |
| H  | 2.76791500  | -1.55381600 | -3.62355400 |
| H  | 4.62082500  | -0.09166600 | -3.20547200 |
| H  | -3.24554800 | 2.47525000  | 0.58244800  |
| C  | -0.31857100 | -1.34900100 | 2.53480700  |
| N  | -0.86239300 | -1.56385100 | 3.54539300  |
| Cu | 0.29414900  | -1.07477500 | 0.81349300  |
| C  | -0.21674400 | -2.89329900 | 0.19519900  |
| N  | -0.36659400 | -3.95186600 | -0.27944400 |
| C  | 0.81981900  | 4.18968600  | -0.00247200 |
| C  | -0.04086400 | 3.75750600  | 0.99854200  |
| C  | 0.15870300  | 2.52279300  | 1.60820500  |
| C  | 1.19610500  | 1.66030300  | 1.21674200  |
| C  | 2.04590900  | 2.13444600  | 0.19903600  |
| C  | 1.87900500  | 3.37585400  | -0.39394600 |
| H  | -0.86542400 | 4.38301400  | 1.33467900  |
| H  | 2.88742400  | 1.50341200  | -0.09160000 |
| H  | 2.57866100  | 3.71046000  | -1.15909800 |
| C  | 1.51349800  | 0.35005000  | 1.81065900  |
| H  | 2.35188200  | -0.10090700 | 1.26541900  |
| C  | 1.79794300  | 0.27931600  | 3.29038400  |
| H  | 2.61716800  | 0.98577900  | 3.50618700  |
| H  | 0.94973000  | 0.53472600  | 3.92801900  |
| H  | 2.13333300  | -0.72609600 | 3.56775500  |

|    |             |            |             |
|----|-------------|------------|-------------|
| H  | 0.66780300  | 5.16447800 | -0.46219700 |
| Cl | -0.94708500 | 2.08351200 | 2.88531900  |

**TS5c-R**

|   |             |             |             |
|---|-------------|-------------|-------------|
| C | -3.37146200 | 1.56261200  | -0.11680300 |
| O | -2.49722900 | 1.69325400  | -1.27244300 |
| C | -2.79665900 | 0.32094300  | 0.59698700  |
| H | -2.67656100 | 0.43300600  | 1.68179200  |
| C | -1.45460800 | 0.86606800  | -1.05960900 |
| N | -1.47941800 | 0.12805000  | -0.02280300 |
| C | -0.41659700 | 0.88667000  | -2.10965400 |
| C | -0.91894900 | 1.16021200  | -3.53030300 |
| C | -0.15528000 | 2.20562600  | -2.83086500 |
| H | -1.99522400 | 1.27471500  | -3.62106400 |
| H | -0.43165500 | 0.59671600  | -4.32032600 |
| H | -0.68349300 | 3.06635800  | -2.42813200 |
| H | 0.87708300  | 2.38172400  | -3.12555400 |
| C | 2.59539700  | -0.99113100 | -2.75562200 |
| O | 1.47226800  | -0.15379200 | -3.10266100 |
| C | 2.15602500  | -1.66399900 | -1.44684500 |
| H | 1.73546100  | -2.67468700 | -1.54298300 |
| C | 0.71768500  | -0.04791700 | -1.99145100 |
| N | 1.06505500  | -0.77444400 | -0.99420700 |
| C | -5.83928600 | -1.13600700 | -0.93059900 |
| C | -5.69695600 | -2.50301500 | -0.70915300 |
| C | -4.58689600 | -3.00375600 | -0.02833400 |
| C | -3.59956700 | -2.14517800 | 0.44507600  |
| C | -3.74838000 | -0.78248900 | 0.21910300  |
| C | -4.85313800 | -0.27568400 | -0.46278600 |
| H | -6.70690100 | -0.74954500 | -1.46561600 |
| H | -6.45884300 | -3.18972400 | -1.07504900 |
| H | -4.48471600 | -4.07574400 | 0.12852000  |
| H | -2.72126500 | -2.53148400 | 0.96197200  |

|    |             |             |             |
|----|-------------|-------------|-------------|
| C  | -4.79206100 | 1.22538900  | -0.55845900 |
| H  | -4.99572400 | 1.61788900  | -1.56388700 |
| H  | -5.51658000 | 1.70253500  | 0.11832500  |
| C  | 3.55740200  | -2.22148800 | 0.66122400  |
| C  | 3.35968300  | -1.59048500 | -0.56068800 |
| C  | 4.30309100  | -0.71084800 | -1.09148300 |
| C  | 5.46316100  | -0.42752800 | -0.38018000 |
| C  | 5.65822100  | -1.03704600 | 0.85801900  |
| C  | 4.71937700  | -1.93155900 | 1.37299100  |
| H  | 2.81006600  | -2.91594600 | 1.04851900  |
| H  | 6.21034300  | 0.25741000  | -0.78041500 |
| H  | 6.56203400  | -0.82161800 | 1.42529100  |
| H  | 4.89812300  | -2.40896200 | 2.33453800  |
| C  | 3.85206200  | -0.16607700 | -2.42205000 |
| H  | 3.57708800  | 0.89984300  | -2.35841000 |
| H  | 2.74450800  | -1.68084100 | -3.59032500 |
| H  | 4.62210700  | -0.24352600 | -3.20031200 |
| H  | -3.28600600 | 2.49914300  | 0.44851300  |
| C  | -0.34417300 | -1.04915500 | 2.58890300  |
| N  | -0.94813600 | -1.17849000 | 3.58073600  |
| Cu | 0.22543200  | -1.04828200 | 0.83346300  |
| C  | -0.14504200 | -2.94990500 | 0.40109600  |
| N  | -0.18019600 | -4.06024200 | 0.03341700  |
| C  | 1.04486300  | 4.09548200  | -0.20571300 |
| C  | 0.11431000  | 3.79622200  | 0.78071200  |
| C  | 0.20610900  | 2.60242400  | 1.49025900  |
| C  | 1.20055400  | 1.65097500  | 1.21317800  |
| C  | 2.12286500  | 1.98832400  | 0.20484900  |
| C  | 2.06359400  | 3.18905800  | -0.48458400 |
| H  | -0.68212200 | 4.49491900  | 1.02873100  |
| H  | 2.93013600  | 1.28379600  | -0.00336200 |
| H  | 2.81687400  | 3.42040400  | -1.23683500 |
| C  | 1.42603500  | 0.38333900  | 1.93539000  |

|    |             |             |             |
|----|-------------|-------------|-------------|
| H  | 2.23232300  | -0.18342200 | 1.45124900  |
| C  | 1.70849500  | 0.46620600  | 3.41537800  |
| H  | 2.57745800  | 1.13306800  | 3.54195300  |
| H  | 0.88081000  | 0.86378600  | 4.00656400  |
| H  | 1.96907500  | -0.51835300 | 3.81678100  |
| H  | 0.97780700  | 5.03947800  | -0.74348000 |
| Cl | -0.97767200 | 2.33598500  | 2.74502900  |

***c-R-pro***

|    |             |             |             |
|----|-------------|-------------|-------------|
| C  | -2.12283500 | -0.57363500 | -0.81102800 |
| N  | -2.87987400 | -0.15992300 | -1.58728500 |
| C  | 2.91914800  | 0.13951500  | -0.21089700 |
| C  | 1.92378200  | 1.09623700  | -0.06338400 |
| C  | 0.59536300  | 0.70131200  | 0.04882400  |
| C  | 0.22654700  | -0.64690000 | 0.00985100  |
| C  | 1.24990800  | -1.58540400 | -0.13950100 |
| C  | 2.58180100  | -1.20794900 | -0.24720100 |
| H  | 2.16431300  | 2.15644200  | -0.03351000 |
| H  | 0.98500000  | -2.64247500 | -0.17344700 |
| H  | 3.35272700  | -1.96655000 | -0.36396400 |
| C  | -1.19596300 | -1.14666600 | 0.17088500  |
| H  | -1.17472200 | -2.22621200 | -0.04679100 |
| C  | -1.72722500 | -0.97570000 | 1.60028000  |
| H  | -1.05285700 | -1.48292200 | 2.29985600  |
| H  | -1.78579900 | 0.08168200  | 1.87773200  |
| H  | -2.72738100 | -1.41327600 | 1.69443400  |
| H  | 3.95761700  | 0.45214400  | -0.29824800 |
| Cl | -0.60370200 | 1.96210400  | 0.23576200  |

**10c-S**

|   |             |             |             |
|---|-------------|-------------|-------------|
| C | -3.91552400 | 0.35751600  | -1.86191800 |
| O | -3.14339400 | -0.84548000 | -2.13994200 |
| C | -3.25586600 | 0.89667400  | -0.56991600 |

|   |             |             |             |
|---|-------------|-------------|-------------|
| H | -2.99078500 | 1.96325200  | -0.59624100 |
| C | -2.09975100 | -0.83213800 | -1.28595900 |
| N | -2.03391300 | 0.10166000  | -0.42654100 |
| C | -1.12854700 | -1.93688900 | -1.44225600 |
| C | -1.63904800 | -3.20705100 | -2.10031200 |
| C | -0.72408900 | -2.33737000 | -2.86351500 |
| H | -2.69268100 | -3.19777600 | -2.36311000 |
| H | -1.25728600 | -4.14106900 | -1.70035200 |
| H | -1.12402600 | -1.71857900 | -3.66363700 |
| H | 0.30966800  | -2.65723700 | -2.98896200 |
| C | 1.39746600  | -3.26866000 | 0.78086700  |
| O | 0.33387200  | -3.33641800 | -0.19434400 |
| C | 1.30012000  | -1.83713300 | 1.33200100  |
| H | 0.76849600  | -1.74262200 | 2.28869500  |
| C | -0.08523300 | -2.07761000 | -0.39941100 |
| N | 0.46133800  | -1.16147500 | 0.31487000  |
| C | -6.44358600 | -0.37354600 | 0.81697100  |
| C | -6.27542700 | -0.24319500 | 2.19265700  |
| C | -5.09676800 | 0.28408800  | 2.72222600  |
| C | -4.06564200 | 0.69504600  | 1.88337700  |
| C | -4.24540300 | 0.56610100  | 0.51186300  |
| C | -5.41499500 | 0.03356500  | -0.02483700 |
| H | -7.36433900 | -0.79121200 | 0.40955100  |
| H | -7.07159000 | -0.56118000 | 2.86411100  |
| H | -4.97823200 | 0.36947600  | 3.80060200  |
| H | -3.13194900 | 1.08858000  | 2.28702300  |
| C | -5.36529400 | 0.00887400  | -1.52953000 |
| H | -5.64363500 | -0.95950400 | -1.96686500 |
| H | -6.04163800 | 0.75709700  | -1.96861200 |
| C | 3.22063200  | -0.25509900 | 2.06986100  |
| C | 2.72390800  | -1.37943500 | 1.42358600  |
| C | 3.57441000  | -2.30059500 | 0.81142300  |
| C | 4.95002700  | -2.11876900 | 0.85814000  |

|    |             |             |             |
|----|-------------|-------------|-------------|
| C  | 5.45545600  | -0.99391200 | 1.50622300  |
| C  | 4.59998000  | -0.06503400 | 2.09787100  |
| H  | 2.54183600  | 0.44525200  | 2.55847200  |
| H  | 5.62389000  | -2.84341700 | 0.40070900  |
| H  | 6.53254200  | -0.84024600 | 1.55571400  |
| H  | 5.01330400  | 0.80704100  | 2.60115500  |
| C  | 2.79140800  | -3.40551000 | 0.15431400  |
| H  | 2.71643800  | -3.24809500 | -0.93548800 |
| H  | 1.19097600  | -4.04409300 | 1.52364700  |
| H  | 3.22570700  | -4.40266400 | 0.29917500  |
| H  | -3.80680000 | 1.00435700  | -2.74063100 |
| C  | -0.51036200 | 2.58452500  | 0.62167400  |
| N  | -1.03985000 | 3.61957600  | 0.73049200  |
| Cu | -0.03334700 | 0.79093000  | 0.51118400  |
| C  | -0.38873600 | 0.51262000  | 2.43274500  |
| N  | -0.53775800 | 0.23656400  | 3.55948400  |
| C  | 4.93004000  | 1.03561500  | -1.33847100 |
| C  | 4.33580400  | 2.20561900  | -0.89002400 |
| C  | 2.94989300  | 2.32844500  | -0.86977200 |
| C  | 2.10978700  | 1.28384000  | -1.29805400 |
| C  | 2.75511800  | 0.10743900  | -1.72777100 |
| C  | 4.13158500  | -0.02233600 | -1.76240600 |
| H  | 4.93941700  | 3.04209800  | -0.54499600 |
| H  | 2.12862700  | -0.72019200 | -2.06393600 |
| H  | 4.58258900  | -0.94988800 | -2.11108700 |
| C  | 0.63896200  | 1.31603700  | -1.39581600 |
| C  | -0.02899900 | 2.42612300  | -2.16466500 |
| H  | 0.16044500  | 3.42510900  | -1.76882400 |
| H  | 0.33904800  | 2.39034800  | -3.20380800 |
| H  | -1.11503700 | 2.27496300  | -2.18924800 |
| H  | 0.29174700  | 0.35243500  | -1.78442200 |
| H  | 6.01488700  | 0.94874700  | -1.34716400 |
| Cl | 2.30852500  | 3.82152200  | -0.24686300 |

**TS5c-S**

|   |             |             |             |
|---|-------------|-------------|-------------|
| C | -3.93277000 | 0.43722000  | -1.81957300 |
| O | -3.18994900 | -0.76794700 | -2.15608200 |
| C | -3.22435100 | 0.92831500  | -0.53481600 |
| H | -2.93900100 | 1.98988800  | -0.54107700 |
| C | -2.12309200 | -0.80263300 | -1.33194500 |
| N | -2.01447500 | 0.10567900  | -0.44837100 |
| C | -1.18036500 | -1.92074700 | -1.55550400 |
| C | -1.70985200 | -3.13026800 | -2.30333900 |
| C | -0.77305900 | -2.22732100 | -2.99947200 |
| H | -2.76065100 | -3.08428900 | -2.57315600 |
| H | -1.34770100 | -4.09650200 | -1.96658200 |
| H | -1.15717600 | -1.54903400 | -3.75811600 |
| H | 0.25643200  | -2.55460500 | -3.14060700 |
| C | 1.32216600  | -3.43747600 | 0.56797300  |
| O | 0.24194900  | -3.43382100 | -0.39058500 |
| C | 1.25017800  | -2.04153600 | 1.20830100  |
| H | 0.72940800  | -1.99343500 | 2.17456100  |
| C | -0.14464900 | -2.15257600 | -0.52176700 |
| N | 0.41976800  | -1.28990100 | 0.23992700  |
| C | -6.38885100 | -0.32243400 | 0.91907600  |
| C | -6.17446500 | -0.23160300 | 2.29156800  |
| C | -4.97026200 | 0.26093100  | 2.79681400  |
| C | -3.95933000 | 0.67639500  | 1.93595700  |
| C | -4.18566400 | 0.58757500  | 0.56822400  |
| C | -5.38052500 | 0.08925300  | 0.05521500  |
| H | -7.32934400 | -0.71380100 | 0.53116300  |
| H | -6.95437400 | -0.55388700 | 2.97981000  |
| H | -4.81597200 | 0.31505500  | 3.87267000  |
| H | -3.00610600 | 1.04375700  | 2.31855700  |
| C | -5.37739600 | 0.10233500  | -1.45066600 |
| H | -5.68395300 | -0.85057200 | -1.90283000 |

|    |             |             |             |
|----|-------------|-------------|-------------|
| H  | -6.05524800 | 0.87123300  | -1.84984500 |
| C  | 3.20196400  | -0.54190400 | 2.03179800  |
| C  | 2.68136000  | -1.60923600 | 1.31146300  |
| C  | 3.50987800  | -2.49116700 | 0.61697300  |
| C  | 4.88816400  | -2.32373900 | 0.64633900  |
| C  | 5.41760200  | -1.25281000 | 1.36341700  |
| C  | 4.58321400  | -0.36544600 | 2.04303200  |
| H  | 2.53750000  | 0.11937000  | 2.58888200  |
| H  | 5.54569500  | -3.01958400 | 0.12466500  |
| H  | 6.49698100  | -1.11136500 | 1.40021400  |
| H  | 5.01569800  | 0.46194800  | 2.60259500  |
| C  | 2.70220900  | -3.54231100 | -0.09662900 |
| H  | 2.60416900  | -3.31056400 | -1.17148300 |
| H  | 1.12420600  | -4.25799100 | 1.26308600  |
| H  | 3.13088000  | -4.55021500 | -0.03054600 |
| H  | -3.84166000 | 1.10805400  | -2.68224000 |
| C  | -0.40617100 | 2.51224700  | 0.51421000  |
| N  | -0.93948400 | 3.54053500  | 0.67062400  |
| Cu | -0.04338800 | 0.69614400  | 0.59684700  |
| C  | -0.22623300 | 0.39457500  | 2.52934300  |
| N  | -0.25034400 | 0.08650900  | 3.65778200  |
| C  | 4.90775600  | 1.25645400  | -1.14834000 |
| C  | 4.31260300  | 2.43976800  | -0.73722900 |
| C  | 2.92654300  | 2.56695300  | -0.73399700 |
| C  | 2.09181400  | 1.50715000  | -1.13045200 |
| C  | 2.73529200  | 0.31636900  | -1.51684900 |
| C  | 4.11210600  | 0.18751000  | -1.54661100 |
| H  | 4.91502700  | 3.28673400  | -0.41693600 |
| H  | 2.10975800  | -0.52602200 | -1.81547000 |
| H  | 4.56327300  | -0.75117600 | -1.86191100 |
| C  | 0.62054600  | 1.54258800  | -1.27142800 |
| C  | -0.00915100 | 2.60817200  | -2.13293700 |
| H  | 0.18263400  | 3.62757900  | -1.79457800 |



|    |             |            |             |
|----|-------------|------------|-------------|
| H  | 0.40020800  | 2.49167200 | -3.14962800 |
| H  | -1.09491500 | 2.46623600 | -2.18693300 |
| H  | 0.27271900  | 0.56686800 | -1.62754900 |
| H  | 5.99263600  | 1.16859100 | -1.14895400 |
| Cl | 2.28586000  | 4.09462600 | -0.20127200 |

***c-S-pro***

|    |             |             |             |
|----|-------------|-------------|-------------|
| C  | 2.12211800  | -0.57440500 | -0.81148100 |
| N  | 2.87813200  | -0.16125800 | -1.58904500 |
| C  | -2.91903700 | 0.13921000  | -0.21093900 |
| C  | -1.92373400 | 1.09603800  | -0.06349000 |
| C  | -0.59534000 | 0.70124500  | 0.04900200  |
| C  | -0.22644200 | -0.64701100 | 0.01062100  |
| C  | -1.24969000 | -1.58556100 | -0.13873600 |
| C  | -2.58160500 | -1.20820300 | -0.24687400 |
| H  | -2.16439700 | 2.15621900  | -0.03399200 |
| H  | -0.98473100 | -2.64263800 | -0.17223100 |
| H  | -3.35240800 | -1.96691400 | -0.36364300 |
| C  | 1.19619300  | -1.14645000 | 0.17197800  |
| C  | 1.72834500  | -0.97378700 | 1.60077400  |
| H  | 1.78691400  | 0.08388700  | 1.87710900  |
| H  | 1.05454100  | -1.48044100 | 2.30130400  |
| H  | 2.72861600  | -1.41114500 | 1.69470600  |
| H  | 1.17493000  | -2.22628400 | -0.04436400 |
| H  | -3.95748800 | 0.45181600  | -0.29854700 |
| Cl | 0.60366200  | 1.96222700  | 0.23516700  |

**10d-R**

|   |             |            |             |
|---|-------------|------------|-------------|
| C | -3.31160300 | 1.82892200 | 0.05845500  |
| O | -2.34303800 | 2.06852900 | -0.99263700 |
| C | -2.90765300 | 0.42950700 | 0.57563500  |
| H | -2.83203300 | 0.36250200 | 1.66932900  |
| C | -1.40970000 | 1.09947200 | -0.89021800 |

|   |             |             |             |
|---|-------------|-------------|-------------|
| N | -1.58644300 | 0.18886700  | -0.01863600 |
| C | -0.30429700 | 1.20987700  | -1.86207500 |
| C | -0.66614200 | 1.84105800  | -3.20849700 |
| C | 0.15052700  | 2.61402200  | -2.25979900 |
| H | -1.71407000 | 2.10176600  | -3.32358700 |
| H | -0.18667700 | 1.40402800  | -4.07897100 |
| H | -0.31314800 | 3.42332500  | -1.70063500 |
| H | 1.21652300  | 2.72507200  | -2.44686000 |
| C | 2.48743700  | -0.86654700 | -2.83308200 |
| O | 1.49915600  | 0.17179100  | -2.99117300 |
| C | 1.98443100  | -1.66570400 | -1.61805500 |
| H | 1.48163800  | -2.61284100 | -1.86109500 |
| C | 0.72165900  | 0.15278700  | -1.89469000 |
| N | 0.96189500  | -0.76987500 | -1.03716500 |
| C | -6.00121100 | -0.41808800 | -1.27621400 |
| C | -6.03241700 | -1.80936000 | -1.24735100 |
| C | -5.03496600 | -2.53166400 | -0.59220900 |
| C | -3.98802400 | -1.87440200 | 0.04525300  |
| C | -3.95841900 | -0.48594500 | 0.00537500  |
| C | -4.95285000 | 0.24162400  | -0.64597800 |
| H | -6.78315200 | 0.14272500  | -1.78845600 |
| H | -6.84323700 | -2.34002900 | -1.74412700 |
| H | -5.06663000 | -3.61921900 | -0.58647600 |
| H | -3.20146600 | -2.43544100 | 0.54851400  |
| C | -4.72004400 | 1.72295800  | -0.51983400 |
| H | -4.79334200 | 2.26786100  | -1.47072300 |
| H | -5.44494700 | 2.18822700  | 0.16481900  |
| C | 3.31157100  | -2.59077100 | 0.40780200  |
| C | 3.19089000  | -1.82513200 | -0.74488000 |
| C | 4.24339400  | -1.03444500 | -1.20494500 |
| C | 5.43850400  | -0.98785300 | -0.49633600 |
| C | 5.55732600  | -1.73387600 | 0.67469300  |
| C | 4.50486200  | -2.53204400 | 1.12393700  |

|    |             |             |             |
|----|-------------|-------------|-------------|
| H  | 2.48295400  | -3.21747700 | 0.74399100  |
| H  | 6.27060500  | -0.37741600 | -0.84773300 |
| H  | 6.48673600  | -1.70183400 | 1.24054800  |
| H  | 4.61987700  | -3.11830800 | 2.03383900  |
| C  | 3.86741000  | -0.29960900 | -2.46326600 |
| H  | 3.77640500  | 0.78423700  | -2.28967800 |
| H  | 2.49438300  | -1.43497800 | -3.76691400 |
| H  | 4.60070100  | -0.43289500 | -3.26927700 |
| H  | -3.18679800 | 2.63870800  | 0.78820300  |
| C  | -0.81493900 | -2.30458000 | 2.03401200  |
| N  | -1.37034800 | -2.87514100 | 2.88920300  |
| Cu | -0.12233200 | -1.45612300 | 0.53335900  |
| C  | -0.81786900 | -2.86712600 | -0.70034900 |
| N  | -1.08349800 | -3.65374200 | -1.52463200 |
| C  | -0.16293500 | 3.63608300  | 1.70469100  |
| C  | -0.82433700 | 2.77654500  | 2.53894200  |
| C  | -0.41287800 | 1.43703900  | 2.72590700  |
| C  | 0.68241400  | 0.94541700  | 2.00396100  |
| C  | 1.45464500  | 1.86935100  | 1.20066500  |
| C  | 1.01641100  | 3.21922000  | 1.04952400  |
| H  | -1.70406300 | 3.12242900  | 3.08341100  |
| C  | 1.08468200  | -0.46596300 | 2.03923900  |
| H  | 1.90068200  | -0.68356800 | 1.34902600  |
| C  | 1.37207800  | -1.14523000 | 3.35263400  |
| H  | 2.19733500  | -0.59308300 | 3.83449700  |
| H  | 0.53579600  | -1.18136200 | 4.05251400  |
| H  | 1.70550100  | -2.17638800 | 3.19130000  |
| H  | -0.50754100 | 4.66207200  | 1.57234900  |
| C  | -1.21799000 | 0.61690800  | 3.68891300  |
| H  | -1.42067000 | -0.40102400 | 3.33515300  |
| H  | -0.70159700 | 0.51979600  | 4.65445800  |
| H  | -2.17922000 | 1.10426400  | 3.89654800  |
| C  | 1.77891500  | 4.13938600  | 0.28992300  |

|   |            |            |             |
|---|------------|------------|-------------|
| C | 2.96835300 | 3.77105000 | -0.28299700 |
| H | 1.40729300 | 5.16051000 | 0.19552900  |
| C | 2.69906000 | 1.53374000 | 0.60601600  |
| C | 3.43342200 | 2.45299000 | -0.10630700 |
| H | 3.55958900 | 4.49131500 | -0.84546400 |
| H | 3.12839500 | 0.54403800 | 0.74546300  |
| H | 4.40329100 | 2.15955000 | -0.50877800 |

**TS5d-R**

|   |             |             |             |
|---|-------------|-------------|-------------|
| C | -3.29246200 | 1.77918700  | -0.04542700 |
| O | -2.34112600 | 1.98826200  | -1.11986600 |
| C | -2.86650600 | 0.40426300  | 0.51539700  |
| H | -2.78043100 | 0.37385400  | 1.61063800  |
| C | -1.39250400 | 1.03788300  | -0.99257600 |
| N | -1.54806900 | 0.16108900  | -0.08149200 |
| C | -0.29527100 | 1.12790200  | -1.97591600 |
| C | -0.67172000 | 1.70075300  | -3.34353100 |
| C | 0.13705000  | 2.52165600  | -2.42839000 |
| H | -1.72346200 | 1.94283600  | -3.46537900 |
| H | -0.18835000 | 1.23718200  | -4.19814900 |
| H | -0.33550900 | 3.34671400  | -1.90049300 |
| H | 1.20098500  | 2.63862400  | -2.62330700 |
| C | 2.53881000  | -0.94144900 | -2.84276600 |
| O | 1.53893100  | 0.07780800  | -3.05613400 |
| C | 2.02866200  | -1.69787000 | -1.60201100 |
| H | 1.55602500  | -2.66932300 | -1.80676000 |
| C | 0.74576400  | 0.08443700  | -1.96843300 |
| N | 0.97865400  | -0.80411700 | -1.07745700 |
| C | -5.95950900 | -0.54391500 | -1.28730700 |
| C | -5.96434700 | -1.93450300 | -1.22629300 |
| C | -4.94675600 | -2.62296800 | -0.56564300 |
| C | -3.90678800 | -1.93184100 | 0.04741400  |
| C | -3.90625700 | -0.54400400 | -0.02067400 |

|    |             |             |             |
|----|-------------|-------------|-------------|
| C  | -4.91871100 | 0.14963300  | -0.68131800 |
| H  | -6.75524400 | -0.00984100 | -1.80681900 |
| H  | -6.76914300 | -2.49144400 | -1.70369100 |
| H  | -4.95628800 | -3.71059400 | -0.53691900 |
| H  | -3.10222900 | -2.46782600 | 0.54964500  |
| C  | -4.70760600 | 1.63729100  | -0.59829500 |
| H  | -4.80452300 | 2.15504600  | -1.56211500 |
| H  | -5.42816500 | 2.11014900  | 0.08579100  |
| C  | 3.31983200  | -2.47711800 | 0.50651000  |
| C  | 3.21615300  | -1.78318800 | -0.69283800 |
| C  | 4.26363400  | -0.99660500 | -1.16993100 |
| C  | 5.43854900  | -0.88452100 | -0.43503200 |
| C  | 5.54148900  | -1.55969000 | 0.77968900  |
| C  | 4.49278800  | -2.35197900 | 1.24797400  |
| H  | 2.49565300  | -3.10321700 | 0.85475000  |
| H  | 6.26734900  | -0.27719000 | -0.79964300 |
| H  | 6.45513500  | -1.47605500 | 1.36566400  |
| H  | 4.59571300  | -2.88331900 | 2.19250600  |
| C  | 3.90604500  | -0.34059500 | -2.47684400 |
| H  | 3.80299100  | 0.75081900  | -2.37071900 |
| H  | 2.56693200  | -1.54537800 | -3.75366800 |
| H  | 4.65746200  | -0.51406700 | -3.25827900 |
| H  | -3.16427200 | 2.61661600  | 0.65201600  |
| C  | -0.66605500 | -2.03666100 | 2.20820800  |
| N  | -1.22092300 | -2.56667300 | 3.09105900  |
| Cu | -0.13209200 | -1.44263900 | 0.53350000  |
| C  | -0.66701200 | -3.05186400 | -0.50080100 |
| N  | -0.84103600 | -3.96253100 | -1.21468400 |
| C  | -0.28860700 | 3.68017500  | 1.58967400  |
| C  | -0.93946100 | 2.87107200  | 2.47910000  |
| C  | -0.52122400 | 1.54506400  | 2.74430200  |
| C  | 0.56206100  | 1.01437400  | 2.03699000  |
| C  | 1.32889000  | 1.88950600  | 1.17671500  |

|   |             |             |             |
|---|-------------|-------------|-------------|
| C | 0.88828500  | 3.22856800  | 0.95316300  |
| H | -1.81408300 | 3.24669100  | 3.01181000  |
| C | 0.99101900  | -0.39052000 | 2.16391200  |
| H | 1.76527700  | -0.65905600 | 1.44247800  |
| C | 1.39776600  | -0.91727900 | 3.51469700  |
| H | 2.26620500  | -0.31841500 | 3.83853600  |
| H | 0.62633300  | -0.84332100 | 4.28390700  |
| H | 1.70885300  | -1.96554600 | 3.45455900  |
| H | -0.63629200 | 4.69610200  | 1.40015500  |
| C | -1.30297700 | 0.80077200  | 3.78649900  |
| H | -1.45874200 | -0.25789500 | 3.55540200  |
| H | -0.79216600 | 0.84454400  | 4.75953700  |
| H | -2.28633500 | 1.26642200  | 3.93069800  |
| C | 1.64809900  | 4.10818600  | 0.14514000  |
| C | 2.83973900  | 3.71305900  | -0.40461800 |
| H | 1.27427000  | 5.12205500  | -0.00324400 |
| C | 2.57360800  | 1.52440500  | 0.59974200  |
| C | 3.30702200  | 2.40742500  | -0.15787600 |
| H | 3.43088800  | 4.40404300  | -1.00283000 |
| H | 3.00562900  | 0.54413600  | 0.78909300  |
| H | 4.27841700  | 2.09600800  | -0.54230200 |

***d-R-pro***

|   |             |             |             |
|---|-------------|-------------|-------------|
| C | 1.86108000  | -1.80619500 | -0.75530600 |
| N | 1.86714600  | -2.71141000 | -1.48253900 |
| C | -1.28832200 | 2.22602100  | -0.19325500 |
| C | -1.63379400 | 0.86264400  | -0.06991600 |
| C | -0.59688700 | -0.11366800 | 0.03298400  |
| C | 0.76680700  | 0.31732000  | 0.00520600  |
| C | 1.07177700  | 1.66574300  | -0.10370100 |
| C | 0.02288700  | 2.61069400  | -0.20599300 |
| C | 1.90643500  | -0.67569000 | 0.17767600  |
| H | 2.84324800  | -0.15946600 | -0.07258600 |

|   |             |             |             |
|---|-------------|-------------|-------------|
| C | 2.03770300  | -1.16111800 | 1.62934300  |
| H | 2.19376500  | -0.29471600 | 2.28362100  |
| H | 1.12938500  | -1.67394500 | 1.96373200  |
| H | 2.88646600  | -1.84543700 | 1.74204700  |
| H | -2.08575300 | 2.96500300  | -0.27252100 |
| C | 2.48490800  | 2.18318700  | -0.10972400 |
| H | 3.04181300  | 1.89535100  | 0.79331500  |
| H | 3.05945900  | 1.82227600  | -0.97435900 |
| H | 2.49384400  | 3.27796600  | -0.15480600 |
| C | -0.99080000 | -1.47198000 | 0.16471900  |
| C | -2.98970400 | 0.45842600  | -0.04140500 |
| C | -2.31455700 | -1.83312100 | 0.19163600  |
| H | -0.24047000 | -2.25587000 | 0.22736500  |
| C | -3.33043300 | -0.86183000 | 0.08842900  |
| H | -3.75833600 | 1.22725800  | -0.12433400 |
| H | -2.58030200 | -2.88415600 | 0.28875500  |
| H | -4.37608500 | -1.16279000 | 0.10962600  |
| H | 0.28033700  | 3.66579500  | -0.29623200 |

**10d-S**

|   |             |             |             |
|---|-------------|-------------|-------------|
| C | -3.99455900 | 1.56745300  | 1.35068500  |
| O | -3.11514000 | 2.35674600  | 0.50217800  |
| C | -3.49693200 | 0.12374400  | 1.10475900  |
| H | -3.32819400 | -0.46757900 | 2.01548000  |
| C | -2.14592500 | 1.52051900  | 0.07351400  |
| N | -2.22703400 | 0.29286600  | 0.39443600  |
| C | -1.09430600 | 2.14121800  | -0.75979700 |
| C | -1.53473300 | 3.34978500  | -1.58470900 |
| C | -0.65657700 | 3.56744800  | -0.42390700 |
| H | -2.58604200 | 3.60611400  | -1.49292900 |
| H | -1.11017100 | 3.42562900  | -2.58065600 |
| H | -1.07893900 | 3.98973800  | 0.48563300  |
| H | 0.39618700  | 3.77992700  | -0.60211400 |

|   |             |             |             |
|---|-------------|-------------|-------------|
| C | 1.51495600  | 0.81925100  | -2.87653500 |
| O | 0.53246900  | 1.78589000  | -2.44773600 |
| C | 1.08848300  | -0.46888000 | -2.16505900 |
| H | 0.42576700  | -1.12803700 | -2.74308700 |
| C | -0.07740900 | 1.25703200  | -1.37361600 |
| N | 0.26866400  | 0.06330800  | -1.04750100 |
| C | -6.67693800 | 0.04895300  | -0.78903500 |
| C | -6.63742600 | -1.17725900 | -1.44664500 |
| C | -5.55517100 | -2.04248600 | -1.28079900 |
| C | -4.49398400 | -1.69764600 | -0.44959200 |
| C | -4.54431600 | -0.47377100 | 0.20597300  |
| C | -5.61729900 | 0.39873400  | 0.03980300  |
| H | -7.52220400 | 0.72334300  | -0.92654000 |
| H | -7.45857300 | -1.46256700 | -2.10248400 |
| H | -5.53502900 | -2.99274100 | -1.81070700 |
| H | -3.63462700 | -2.35820400 | -0.33005800 |
| C | -5.43838400 | 1.64812400  | 0.86040800  |
| H | -5.60995600 | 2.57679900  | 0.29961500  |
| H | -6.12534400 | 1.66901800  | 1.71945400  |
| C | 2.60548200  | -2.46624200 | -1.49769300 |
| C | 2.38558400  | -1.13447800 | -1.82349800 |
| C | 3.44609100  | -0.24618200 | -2.01503000 |
| C | 4.75561000  | -0.68881300 | -1.88810200 |
| C | 4.98437300  | -2.02529700 | -1.56598900 |
| C | 3.92136400  | -2.90469600 | -1.36452100 |
| H | 1.76150900  | -3.14839800 | -1.38523800 |
| H | 5.59049600  | -0.00504800 | -2.04621300 |
| H | 6.00736300  | -2.38825000 | -1.47451100 |
| H | 4.12028800  | -3.94754400 | -1.12292200 |
| C | 2.93594300  | 1.12212000  | -2.38366200 |
| H | 2.88841600  | 1.77912400  | -1.49776800 |
| H | 1.45032200  | 0.76610500  | -3.96705300 |
| H | 3.54874800  | 1.63617800  | -3.13419100 |



|    |             |             |             |
|----|-------------|-------------|-------------|
| H  | -3.85310700 | 1.93655900  | 2.37345200  |
| C  | -1.04536100 | -2.20841400 | 1.78978100  |
| N  | -1.60405600 | -2.84007600 | 2.59764300  |
| Cu | -0.42696600 | -1.15962400 | 0.38772400  |
| C  | -0.94067800 | -2.50436900 | -0.97470500 |
| N  | -1.12733400 | -3.25295000 | -1.85415300 |
| C  | 4.72258200  | -0.22008200 | 1.38148500  |
| C  | 4.03180900  | -1.33993500 | 1.74451300  |
| C  | 2.62896600  | -1.33550900 | 1.92762600  |
| C  | 1.91562900  | -0.14892600 | 1.74384500  |
| C  | 2.63646300  | 1.05821000  | 1.41112700  |
| C  | 4.04801700  | 1.00654000  | 1.20702500  |
| H  | 4.56241500  | -2.28275700 | 1.87508900  |
| C  | 0.44973300  | -0.05272000 | 1.93978200  |
| C  | -0.04420900 | -0.12070100 | 3.36241300  |
| H  | 0.23663500  | -1.03524600 | 3.89173700  |
| H  | 0.40637800  | 0.73012000  | 3.90346700  |
| H  | -1.13391300 | -0.02419000 | 3.41881800  |
| H  | 0.03843100  | 0.83953700  | 1.46639700  |
| H  | 5.80037100  | -0.25721200 | 1.21992200  |
| C  | 1.98977900  | -2.65299700 | 2.24863000  |
| H  | 1.35788300  | -2.62794000 | 3.14269800  |
| H  | 1.34020100  | -3.00064700 | 1.43248700  |
| H  | 2.75773400  | -3.41967600 | 2.40400500  |
| C  | 4.76158300  | 2.17363500  | 0.84605500  |
| C  | 2.02908700  | 2.33845600  | 1.31816300  |
| C  | 2.74832900  | 3.46340800  | 0.98569300  |
| C  | 4.13022200  | 3.38484800  | 0.72586800  |
| H  | 5.83620600  | 2.08657600  | 0.68040300  |
| H  | 0.97245300  | 2.45874700  | 1.54818800  |
| H  | 2.24509800  | 4.42934700  | 0.94462500  |
| H  | 4.68963400  | 4.27871700  | 0.45695800  |

**TS5d-S**

|   |             |             |             |
|---|-------------|-------------|-------------|
| C | -4.01695500 | 1.49469200  | 1.35806500  |
| O | -3.13816600 | 2.34259500  | 0.56877900  |
| C | -3.47046600 | 0.07604200  | 1.07142500  |
| H | -3.28817200 | -0.53738800 | 1.96506700  |
| C | -2.14376400 | 1.55051800  | 0.11460000  |
| N | -2.20080000 | 0.30725800  | 0.37819000  |
| C | -1.09413200 | 2.23556000  | -0.66740900 |
| C | -1.53738000 | 3.49319000  | -1.41173900 |
| C | -0.67311200 | 3.63834000  | -0.22881200 |
| H | -2.59140700 | 3.73577900  | -1.31380900 |
| H | -1.10292500 | 3.64008200  | -2.39542700 |
| H | -1.10862000 | 3.99552700  | 0.70223400  |
| H | 0.37980700  | 3.86966700  | -0.38019500 |
| C | 1.54789600  | 1.08813300  | -2.83728900 |
| O | 0.54530700  | 2.00975200  | -2.36398300 |
| C | 1.13911200  | -0.24797000 | -2.20642200 |
| H | 0.49318200  | -0.88356000 | -2.82860100 |
| C | -0.06015000 | 1.40432000  | -1.32583100 |
| N | 0.29979800  | 0.20021700  | -1.06562800 |
| C | -6.61997500 | -0.04307300 | -0.86894400 |
| C | -6.53660200 | -1.25207000 | -1.55359200 |
| C | -5.43189500 | -2.08976300 | -1.39318800 |
| C | -4.39226500 | -1.73456200 | -0.53945500 |
| C | -4.48777000 | -0.52909000 | 0.14465900  |
| C | -5.58210200 | 0.31704800  | -0.01730000 |
| H | -7.48217200 | 0.61020700  | -1.00313800 |
| H | -7.34046500 | -1.54539800 | -2.22706300 |
| H | -5.37724800 | -3.02607900 | -1.94500600 |
| H | -3.51516700 | -2.37229000 | -0.42342400 |
| C | -5.45029900 | 1.55272400  | 0.83247200  |
| H | -5.62718900 | 2.48827300  | 0.28480900  |
| H | -6.15969000 | 1.54300500  | 1.67320300  |

|    |             |             |             |
|----|-------------|-------------|-------------|
| C  | 2.69664200  | -2.25896400 | -1.67922800 |
| C  | 2.44924700  | -0.91121500 | -1.90616200 |
| C  | 3.49335500  | 0.00812800  | -2.03325500 |
| C  | 4.81170600  | -0.41671700 | -1.93981900 |
| C  | 5.06724900  | -1.76854100 | -1.71692300 |
| C  | 4.02135900  | -2.68023000 | -1.58131000 |
| H  | 1.86644900  | -2.96400100 | -1.62028100 |
| H  | 5.63269400  | 0.29255500  | -2.05191000 |
| H  | 6.09728700  | -2.11790900 | -1.65561900 |
| H  | 4.24046600  | -3.73452600 | -1.41982800 |
| C  | 2.95668500  | 1.38771500  | -2.30896900 |
| H  | 2.88536400  | 1.97871700  | -1.37860200 |
| H  | 1.49844500  | 1.09770500  | -3.93000600 |
| H  | 3.56506500  | 1.96732100  | -3.01408900 |
| H  | -3.91634700 | 1.82654600  | 2.39805600  |
| C  | -0.99448800 | -2.15159700 | 1.73960200  |
| N  | -1.60193600 | -2.82905300 | 2.47339900  |
| Cu | -0.43184100 | -1.16438500 | 0.27769900  |
| C  | -0.79394200 | -2.49900600 | -1.12979100 |
| N  | -0.88770700 | -3.23612700 | -2.03372400 |
| C  | 4.60456300  | -0.36871100 | 1.36529200  |
| C  | 3.93737100  | -1.52494900 | 1.64771200  |
| C  | 2.54095900  | -1.55327900 | 1.87502900  |
| C  | 1.81470300  | -0.36445100 | 1.81035000  |
| C  | 2.50609300  | 0.87644900  | 1.55387900  |
| C  | 3.91233000  | 0.85955800  | 1.31312400  |
| H  | 4.48147200  | -2.46845300 | 1.68111300  |
| C  | 0.35678500  | -0.29561000 | 2.08315300  |
| C  | -0.03754400 | -0.41745200 | 3.53451000  |
| H  | 0.29987200  | -1.34453800 | 4.00676200  |
| H  | 0.44628600  | 0.42330000  | 4.06107200  |
| H  | -1.12022700 | -0.34035700 | 3.67548000  |
| H  | -0.10273700 | 0.60233100  | 1.66858800  |

|   |            |             |            |
|---|------------|-------------|------------|
| H | 5.67764600 | -0.37706300 | 1.17283000 |
| C | 1.92312000 | -2.89872100 | 2.11537000 |
| H | 1.29273400 | -2.93727400 | 3.01002200 |
| H | 1.27937800 | -3.20650400 | 1.27882600 |
| H | 2.70455000 | -3.65964100 | 2.22462600 |
| C | 4.60406500 | 2.06182600  | 1.03498100 |
| C | 1.87845000 | 2.15033000  | 1.57012400 |
| C | 2.57784500 | 3.30782400  | 1.31733500 |
| C | 3.95597300 | 3.27000100  | 1.02879800 |
| H | 5.67520900 | 2.00258600  | 0.83745800 |
| H | 0.82148000 | 2.23797600  | 1.81560400 |
| H | 2.06113300 | 4.26646700  | 1.35998700 |
| H | 4.49863800 | 4.19070900  | 0.82373800 |

***d-S-pro***

|   |             |             |             |
|---|-------------|-------------|-------------|
| C | 2.74413600  | -0.94977600 | -0.74140500 |
| N | 3.71107300  | -0.84169400 | -1.37497600 |
| C | -1.28142600 | 2.14799600  | -0.00504600 |
| C | 0.05819900  | 2.38600800  | 0.10783600  |
| C | 1.00620800  | 1.33259600  | 0.13529500  |
| C | 0.56433700  | 0.02247200  | 0.02756000  |
| C | -0.83934800 | -0.26010700 | -0.04444300 |
| C | -1.76793800 | 0.82397400  | -0.07071800 |
| H | 0.42515800  | 3.40984200  | 0.17918600  |
| C | 1.52976600  | -1.15339800 | 0.05242400  |
| C | 1.87228800  | -1.58857700 | 1.48428600  |
| H | 2.36244800  | -0.77841200 | 2.03645700  |
| H | 0.94747000  | -1.84514100 | 2.01457900  |
| H | 2.53639200  | -2.46072700 | 1.48724600  |
| H | 1.04456700  | -2.00419400 | -0.44532700 |
| H | -1.99420100 | 2.97236900  | -0.02821000 |
| C | 2.45090800  | 1.72522200  | 0.27479000  |
| H | 2.96469200  | 1.75394000  | -0.69524000 |

|   |             |             |             |
|---|-------------|-------------|-------------|
| H | 2.52592300  | 2.72565300  | 0.71719900  |
| H | 3.02816200  | 1.04375200  | 0.91015300  |
| C | -3.15654400 | 0.56621800  | -0.15016100 |
| C | -1.38063800 | -1.57310600 | -0.07104000 |
| C | -2.73403000 | -1.79431500 | -0.13880700 |
| C | -3.63862200 | -0.71576500 | -0.18616100 |
| H | -3.83674100 | 1.41791500  | -0.17642000 |
| H | -0.72622400 | -2.44087000 | -0.02106800 |
| H | -3.11000800 | -2.81581800 | -0.15460600 |
| H | -4.70892300 | -0.90310500 | -0.24557400 |

### 10e-R

|   |             |             |             |
|---|-------------|-------------|-------------|
| C | -4.04229300 | -0.16790900 | -1.24349200 |
| O | -3.48008900 | -1.48827700 | -1.42913500 |
| C | -3.01434400 | 0.49771900  | -0.30676800 |
| H | -2.75154800 | 1.51845100  | -0.60253000 |
| C | -2.21663200 | -1.44042800 | -0.94851400 |
| N | -1.82975000 | -0.36387200 | -0.38477700 |
| C | -1.42639600 | -2.66866800 | -1.15492300 |
| C | -2.15176600 | -3.90626000 | -1.66966000 |
| C | -1.28775000 | -3.15922800 | -2.59795700 |
| H | -3.22898700 | -3.80675400 | -1.76367200 |
| H | -1.79564600 | -4.85538200 | -1.28006400 |
| H | -1.74226800 | -2.51514200 | -3.34709100 |
| H | -0.30853600 | -3.55078000 | -2.86287400 |
| C | 1.49486100  | -4.05465200 | 0.38735700  |
| O | 0.23930000  | -4.13938000 | -0.31303500 |
| C | 1.34101000  | -2.79326200 | 1.25001200  |
| H | 0.95997200  | -2.96904500 | 2.26677100  |
| C | -0.26801500 | -2.89039300 | -0.27429200 |
| N | 0.30350800  | -2.04802800 | 0.50665500  |
| C | -5.77632300 | -0.12728300 | 2.08054500  |
| C | -5.22037600 | 0.18355900  | 3.31832200  |

|    |             |             |             |
|----|-------------|-------------|-------------|
| C  | -3.89805100 | 0.61822200  | 3.41619200  |
| C  | -3.10990100 | 0.75392600  | 2.27714200  |
| C  | -3.67403600 | 0.44635600  | 1.04518500  |
| C  | -4.99214200 | 0.00537100  | 0.94059000  |
| H  | -6.80734200 | -0.47409200 | 2.00880600  |
| H  | -5.82212500 | 0.08034300  | 4.22017700  |
| H  | -3.47453300 | 0.84723100  | 4.39249100  |
| H  | -2.06736000 | 1.06814900  | 2.35026800  |
| C  | -5.36989600 | -0.24832000 | -0.49454000 |
| H  | -5.85552100 | -1.21942300 | -0.66008900 |
| H  | -6.06292600 | 0.51870200  | -0.87149300 |
| C  | 3.26003700  | -1.28033900 | 2.13806500  |
| C  | 2.71512600  | -2.19604100 | 1.24751000  |
| C  | 3.48290800  | -2.76514000 | 0.22902100  |
| C  | 4.81388300  | -2.40199100 | 0.07508900  |
| C  | 5.36763600  | -1.48580200 | 0.96725500  |
| C  | 4.60173200  | -0.93474600 | 1.99414400  |
| H  | 2.64657900  | -0.83773400 | 2.92256600  |
| H  | 5.42157100  | -2.84050500 | -0.71579500 |
| H  | 6.41549100  | -1.20471300 | 0.86811500  |
| H  | 5.05445300  | -0.22636400 | 2.68623800  |
| C  | 2.67419700  | -3.76266400 | -0.55445300 |
| H  | 2.29241900  | -3.30852400 | -1.48456600 |
| H  | 1.61438700  | -4.98267100 | 0.95378500  |
| H  | 3.23496900  | -4.66327000 | -0.83311900 |
| H  | -4.11811400 | 0.29194700  | -2.23764200 |
| C  | 1.00534100  | -0.60146100 | -1.86457800 |
| N  | 1.28515300  | -1.10223300 | -2.88444800 |
| Cu | 0.50573200  | 0.02602000  | -0.12233200 |
| C  | 0.49318600  | 0.78383000  | 1.64386100  |
| N  | 0.49384700  | 1.21576600  | 2.73118300  |
| C  | -2.63192400 | 4.08908300  | -1.25334300 |
| C  | -1.96396700 | 4.06237000  | -0.02834000 |

|   |             |            |             |
|---|-------------|------------|-------------|
| C | -0.79111400 | 3.33669500 | 0.11420400  |
| C | -0.25941000 | 2.62977600 | -0.97779600 |
| C | -0.95937200 | 2.63821900 | -2.19575700 |
| C | -2.13152300 | 3.36888300 | -2.33592700 |
| H | -2.36632700 | 4.60763800 | 0.82317200  |
| H | -0.56054800 | 2.06502000 | -3.03386800 |
| H | -2.65417900 | 3.38011300 | -3.29088200 |
| C | 1.04174200  | 1.96676400 | -0.93806000 |
| H | 1.36115800  | 1.65729000 | -1.93576600 |
| H | -3.55033200 | 4.66412100 | -1.35886400 |
| H | -0.28778100 | 3.29140900 | 1.07903100  |
| C | 4.98763400  | 3.51497700 | -0.11030500 |
| C | 4.60045400  | 2.18307200 | 0.52024100  |
| C | 3.39465700  | 1.56869900 | -0.17478800 |
| C | 2.19949600  | 2.51872500 | -0.16351200 |
| C | 2.59659700  | 3.85767300 | -0.82401200 |
| C | 3.80244800  | 4.47129100 | -0.12052900 |
| H | 5.83863600  | 3.96411600 | 0.42077000  |
| H | 5.44507700  | 1.47998400 | 0.49380200  |
| H | 3.64680800  | 1.32454700 | -1.22295200 |
| H | 2.84045200  | 3.67569400 | -1.88569300 |
| H | 3.52401700  | 4.71755700 | 0.91774300  |
| H | 4.35619000  | 2.33826000 | 1.58590500  |
| H | 3.11510000  | 0.61964900 | 0.30604800  |
| H | 1.91523100  | 2.72165300 | 0.87986700  |
| H | 1.74496800  | 4.55296200 | -0.80852600 |
| H | 4.07055400  | 5.42013500 | -0.60663900 |
| H | 5.32053400  | 3.34093400 | -1.14784800 |

**TS5e-R**

|   |            |             |            |
|---|------------|-------------|------------|
| C | 4.06278300 | 0.14123800  | 1.76417800 |
| O | 3.36536000 | -1.12919500 | 1.85751800 |
| C | 3.49335400 | 0.73908400  | 0.45751400 |

|   |             |             |             |
|---|-------------|-------------|-------------|
| H | 3.13093000  | 1.77055800  | 0.56986000  |
| C | 2.40298300  | -1.11012700 | 0.92038300  |
| N | 2.36079300  | -0.12490200 | 0.10723400  |
| C | 1.46005500  | -2.24592800 | 0.96469800  |
| C | 1.92652100  | -3.53417200 | 1.60310100  |
| C | 0.96249800  | -2.68563100 | 2.33808300  |
| H | 2.95874000  | -3.55041700 | 1.94124700  |
| H | 1.56864000  | -4.44947500 | 1.13946200  |
| H | 1.30249100  | -2.08647500 | 3.17997300  |
| H | -0.08046800 | -3.00040600 | 2.37865100  |
| C | -0.72208200 | -3.32508600 | -1.70114400 |
| O | 0.36609200  | -3.49822800 | -0.77527800 |
| C | -0.88962800 | -1.79585300 | -1.79502900 |
| H | -0.37647200 | -1.31271100 | -2.63905200 |
| C | 0.48363100  | -2.30682300 | -0.14559000 |
| N | -0.23003600 | -1.33320400 | -0.55850900 |
| C | 6.91664400  | -0.10565200 | -0.67192500 |
| C | 6.88834700  | 0.16208000  | -2.03755300 |
| C | 5.72936400  | 0.64733900  | -2.64509400 |
| C | 4.58130400  | 0.87351200  | -1.89268800 |
| C | 4.61858700  | 0.60915600  | -0.52963800 |
| C | 5.77028600  | 0.11951800  | 0.08210800  |
| H | 7.82310700  | -0.48960700 | -0.20365900 |
| H | 7.77903700  | -0.01257000 | -2.63934700 |
| H | 5.72335700  | 0.84581000  | -3.71550900 |
| H | 3.66325500  | 1.23698200  | -2.35538000 |
| C | 5.56197500  | -0.07596400 | 1.56065300  |
| H | 5.86443100  | -1.06914800 | 1.91925300  |
| H | 6.13484900  | 0.65682500  | 2.14771300  |
| C | -3.07792500 | -0.46547000 | -2.23616900 |
| C | -2.37506400 | -1.59871500 | -1.84392700 |
| C | -3.03610000 | -2.77252900 | -1.47928500 |
| C | -4.42537000 | -2.81857400 | -1.47134200 |



|    |             |             |             |
|----|-------------|-------------|-------------|
| C  | -5.13787200 | -1.68013300 | -1.84450500 |
| C  | -4.47093400 | -0.51526500 | -2.22752800 |
| H  | -2.53098000 | 0.42288000  | -2.56135000 |
| H  | -4.95084000 | -3.73236400 | -1.19374200 |
| H  | -6.22676600 | -1.70543500 | -1.85243900 |
| H  | -5.04502300 | 0.35629400  | -2.54046500 |
| C  | -2.05176900 | -3.86025200 | -1.14240100 |
| H  | -1.95455500 | -3.98960500 | -0.05098000 |
| H  | -0.43064500 | -3.80869000 | -2.63787600 |
| H  | -2.32624100 | -4.83987900 | -1.55367500 |
| H  | 3.80219800  | 0.70271400  | 2.66713500  |
| C  | 0.50480400  | 1.18475100  | 1.82537600  |
| N  | 0.97352400  | 1.28093500  | 2.89680700  |
| Cu | 0.32107700  | 0.86143100  | -0.07623400 |
| C  | -0.12075000 | 1.50709000  | -1.85940100 |
| N  | -0.53763700 | 1.77387800  | -2.92254600 |
| C  | -1.85323700 | 5.42365100  | -0.96053700 |
| C  | -2.50280000 | 4.27991900  | -1.41940100 |
| C  | -2.46980600 | 3.11868900  | -0.66942000 |
| C  | -1.80270900 | 3.09812500  | 0.57078900  |
| C  | -1.15509700 | 4.26648600  | 1.02290500  |
| C  | -1.17673300 | 5.41794200  | 0.26130800  |
| H  | -3.00184600 | 4.28428300  | -2.38515200 |
| H  | -0.61207100 | 4.23115300  | 1.96762100  |
| H  | -0.66594800 | 6.31351100  | 0.60792200  |
| C  | -1.77824300 | 1.94577200  | 1.41426600  |
| H  | -1.45513500 | 2.13912600  | 2.43771200  |
| H  | -1.86435000 | 6.32813100  | -1.56609100 |
| H  | -2.94791200 | 2.21492000  | -1.04309400 |
| C  | -4.54724300 | -1.19955800 | 2.42447200  |
| C  | -3.12861300 | -1.60286700 | 2.04471400  |
| C  | -2.16673700 | -0.42954500 | 2.14170700  |
| C  | -2.61637800 | 0.73520000  | 1.25863600  |

|   |             |             |            |
|---|-------------|-------------|------------|
| C | -4.05454100 | 1.16063900  | 1.67003600 |
| C | -5.01317100 | -0.02165500 | 1.58068400 |
| H | -5.23606700 | -2.04764900 | 2.30323200 |
| H | -2.77896600 | -2.42794800 | 2.68296900 |
| H | -2.09695100 | -0.07767700 | 3.18644500 |
| H | -4.02827400 | 1.54515400  | 2.70454900 |
| H | -5.08944500 | -0.33758700 | 0.52727500 |
| H | -3.12547900 | -1.97723600 | 1.00641900 |
| H | -1.15501000 | -0.73204400 | 1.84471500 |
| H | -2.65167300 | 0.40602100  | 0.20695600 |
| H | -4.40092900 | 1.98571900  | 1.03252400 |
| H | -6.01668800 | 0.30512300  | 1.88843200 |
| H | -4.57366000 | -0.91968300 | 3.49152300 |

***e-R-pro***

|   |             |             |             |
|---|-------------|-------------|-------------|
| C | -0.15200900 | 2.30668200  | 0.28601100  |
| N | -0.16785800 | 3.43153900  | -0.00174500 |
| C | -3.84925100 | -1.04365700 | -0.37491200 |
| C | -3.22854100 | -0.21058400 | -1.30109500 |
| C | -2.03415700 | 0.42264900  | -0.98006200 |
| C | -1.44755700 | 0.22993000  | 0.27117500  |
| C | -2.07637700 | -0.60212700 | 1.19506700  |
| C | -3.27106100 | -1.23810200 | 0.87462300  |
| H | -3.67982000 | -0.04840400 | -2.27832100 |
| H | -1.62197400 | -0.75524800 | 2.17499200  |
| H | -3.75284300 | -1.88436600 | 1.60621800  |
| C | -0.11886700 | 0.87712800  | 0.60599000  |
| H | 0.05115000  | 0.79037100  | 1.69360800  |
| H | -4.78632200 | -1.53710800 | -0.62629600 |
| H | -1.55733100 | 1.08797300  | -1.70116300 |
| C | 3.65377500  | -1.26171200 | -0.05781100 |
| C | 3.59229100  | 0.22157300  | -0.39937100 |
| C | 2.39774500  | 0.89272200  | 0.26799300  |

|   |            |             |             |
|---|------------|-------------|-------------|
| C | 1.08394500 | 0.20486100  | -0.10115200 |
| C | 1.15147900 | -1.28370600 | 0.23258500  |
| C | 2.34908800 | -1.95344200 | -0.43195400 |
| H | 4.50358100 | -1.74069700 | -0.56366700 |
| H | 4.52143100 | 0.72838300  | -0.10462300 |
| H | 2.51944700 | 0.84483700  | 1.36583100  |
| H | 1.23207400 | -1.39338000 | 1.33047500  |
| H | 2.21972700 | -1.91374800 | -1.52687900 |
| H | 3.50722100 | 0.33903000  | -1.49296600 |
| H | 2.35937000 | 1.95899000  | 0.00366900  |
| H | 0.92728000 | 0.31088100  | -1.19118400 |
| H | 0.22019400 | -1.78610700 | -0.06342900 |
| H | 2.38092600 | -3.01814900 | -0.16226100 |
| H | 3.82787800 | -1.37731700 | 1.02569200  |

**10e-S**

|   |             |             |             |
|---|-------------|-------------|-------------|
| C | 4.26974600  | 0.26002700  | 1.58134900  |
| O | 3.65276300  | -1.05484800 | 1.49731200  |
| C | 3.48348800  | 1.06342100  | 0.52076900  |
| H | 3.10659100  | 2.02708000  | 0.89194400  |
| C | 2.55610900  | -0.92010800 | 0.74189800  |
| N | 2.34332000  | 0.20861800  | 0.17244200  |
| C | 1.65001400  | -2.08607300 | 0.70132400  |
| C | 2.10874700  | -3.40570200 | 1.26406900  |
| C | 1.14275300  | -2.59703200 | 2.04470000  |
| H | 3.13840000  | -3.45174500 | 1.60778500  |
| H | 1.75034000  | -4.28966900 | 0.74212200  |
| H | 1.48096000  | -2.04328500 | 2.91933200  |
| H | 0.09227900  | -2.88887500 | 2.06007600  |
| C | -0.30932800 | -2.84488000 | -2.23207700 |
| O | 0.75545600  | -3.09714300 | -1.29790400 |
| C | -0.62601600 | -1.35199200 | -2.03732300 |
| H | -0.08938800 | -0.66091200 | -2.70332100 |

|    |             |             |             |
|----|-------------|-------------|-------------|
| C  | 0.69221000  | -2.06296700 | -0.42587400 |
| N  | -0.12058200 | -1.11222300 | -0.66747800 |
| C  | 6.72412400  | 0.70094700  | -1.23085700 |
| C  | 6.47361500  | 1.22075800  | -2.49751000 |
| C  | 5.21364100  | 1.72315800  | -2.82615400 |
| C  | 4.18559900  | 1.71645100  | -1.88893900 |
| C  | 4.44602200  | 1.20402200  | -0.62437600 |
| C  | 5.69843700  | 0.69293500  | -0.29222100 |
| H  | 7.70803100  | 0.30308000  | -0.98223100 |
| H  | 7.26804100  | 1.23085600  | -3.24225600 |
| H  | 5.03350200  | 2.11862100  | -3.82428800 |
| H  | 3.19064000  | 2.08753400  | -2.13693800 |
| C  | 5.72841400  | 0.20272700  | 1.13116900  |
| H  | 6.13002000  | -0.81395700 | 1.23772500  |
| H  | 6.34627000  | 0.85245900  | 1.76819500  |
| C  | -2.89822000 | -0.16076800 | -2.47275500 |
| C  | -2.11224300 | -1.27681400 | -2.20933400 |
| C  | -2.67410900 | -2.55060300 | -2.09966400 |
| C  | -4.04946700 | -2.71777900 | -2.20627600 |
| C  | -4.84885400 | -1.59743500 | -2.43082600 |
| C  | -4.27820300 | -0.33240300 | -2.57446900 |
| H  | -2.42872300 | 0.81751300  | -2.59751200 |
| H  | -4.49811500 | -3.70858200 | -2.12796400 |
| H  | -5.92775100 | -1.71529400 | -2.51935100 |
| H  | -4.91549100 | 0.52508600  | -2.78660600 |
| C  | -1.60724600 | -3.58678500 | -1.86509200 |
| H  | -1.56375500 | -3.87893200 | -0.80212200 |
| H  | 0.06075900  | -3.10677300 | -3.22746900 |
| H  | -1.75558700 | -4.50722000 | -2.44371000 |
| H  | 4.12258900  | 0.60177100  | 2.61089300  |
| C  | 0.81168700  | 0.90939300  | 2.37011600  |
| N  | 1.29341200  | 0.81964800  | 3.43360700  |
| Cu | 0.26571800  | 1.00222000  | 0.53152100  |

|   |             |             |             |
|---|-------------|-------------|-------------|
| C | -0.15659400 | 1.77276600  | -1.19112100 |
| N | -0.40987400 | 2.13242700  | -2.27642000 |
| C | -2.84957600 | -2.64651300 | 2.67503900  |
| C | -3.17441700 | -2.18015600 | 1.40281900  |
| C | -2.82385400 | -0.89333800 | 1.02428100  |
| C | -2.13169000 | -0.05019100 | 1.91223100  |
| C | -1.79664500 | -0.54475200 | 3.19031300  |
| C | -2.16305600 | -1.82345200 | 3.56991900  |
| H | -3.71316900 | -2.81447800 | 0.70010600  |
| H | -1.22355700 | 0.08578700  | 3.86786400  |
| H | -1.90765200 | -2.18710700 | 4.56312500  |
| C | -1.83363400 | 1.32502100  | 1.58537600  |
| H | -1.42703800 | 1.90731300  | 2.41634200  |
| H | -3.13274900 | -3.65488200 | 2.97315800  |
| H | -3.08790000 | -0.53238800 | 0.03281300  |
| C | -4.42612400 | 4.36493300  | -0.11395500 |
| C | -4.95076300 | 2.94995900  | 0.09007500  |
| C | -4.10478800 | 2.16252000  | 1.08533400  |
| C | -2.62816500 | 2.12584400  | 0.60947300  |
| C | -2.12249000 | 3.56146400  | 0.47710600  |
| C | -2.95832100 | 4.34703600  | -0.52176600 |
| H | -5.03355400 | 4.89237500  | -0.86255100 |
| H | -5.99606800 | 2.96574600  | 0.43020000  |
| H | -4.15289800 | 2.63431000  | 2.08197400  |
| H | -2.17739800 | 4.04154500  | 1.47135800  |
| H | -2.84546600 | 3.88101600  | -1.51536800 |
| H | -4.94088500 | 2.41409700  | -0.87490600 |
| H | -4.49668000 | 1.14236400  | 1.19543800  |
| H | -2.62281400 | 1.63894400  | -0.37875700 |
| H | -1.06788800 | 3.55956500  | 0.17521600  |
| H | -2.57051400 | 5.37031900  | -0.61490200 |
| H | -4.53369200 | 4.92715300  | 0.82955400  |

**TS5e-S**

|   |             |             |             |
|---|-------------|-------------|-------------|
| C | 4.15487900  | 0.19409000  | 1.67816900  |
| O | 3.47778900  | -1.08759000 | 1.57592300  |
| C | 3.53940200  | 0.99304500  | 0.50548400  |
| H | 3.15650400  | 1.97996400  | 0.80192100  |
| C | 2.49478300  | -0.93162000 | 0.67662300  |
| N | 2.41686600  | 0.17311500  | 0.03713600  |
| C | 1.54310800  | -2.05551600 | 0.57030400  |
| C | 1.94724800  | -3.41228200 | 1.08860800  |
| C | 0.99024000  | -2.60196800 | 1.87920600  |
| H | 2.96748600  | -3.50421500 | 1.45076300  |
| H | 1.57198700  | -4.26433400 | 0.52700500  |
| H | 1.32759300  | -2.09438800 | 2.78135100  |
| H | -0.06718600 | -2.86763800 | 1.86356200  |
| C | -0.44842300 | -2.68345800 | -2.37679300 |
| O | 0.62061400  | -2.97740200 | -1.45861500 |
| C | -0.74408600 | -1.19101900 | -2.13767200 |
| H | -0.23584700 | -0.48886100 | -2.81388300 |
| C | 0.60096700  | -1.96088200 | -0.56750300 |
| N | -0.18561200 | -0.98035300 | -0.78534400 |
| C | 6.95180400  | 0.44959900  | -0.82348200 |
| C | 6.88626600  | 0.95792800  | -2.11756200 |
| C | 5.70300100  | 1.51393000  | -2.60606000 |
| C | 4.56795600  | 1.57121700  | -1.80387400 |
| C | 4.64261700  | 1.06763700  | -0.51147500 |
| C | 5.81848800  | 0.50571100  | -0.01992400 |
| H | 7.87728100  | 0.01193700  | -0.44893300 |
| H | 7.76672200  | 0.91839900  | -2.75722600 |
| H | 5.66810400  | 1.90203600  | -3.62260900 |
| H | 3.63162000  | 1.98859700  | -2.17552900 |
| C | 5.65083700  | 0.04314000  | 1.40311400  |
| H | 5.97421600  | -0.99354700 | 1.56815100  |
| H | 6.23026500  | 0.66671800  | 2.09955200  |

|    |             |             |             |
|----|-------------|-------------|-------------|
| C  | -3.02378700 | 0.03745400  | -2.38528200 |
| C  | -2.23752100 | -1.09843100 | -2.22640300 |
| C  | -2.80786400 | -2.37023800 | -2.14192300 |
| C  | -4.18932600 | -2.51946700 | -2.17372300 |
| C  | -4.98690000 | -1.38233100 | -2.29617000 |
| C  | -4.40960600 | -0.11746700 | -2.41174100 |
| H  | -2.54900900 | 1.01564800  | -2.49651100 |
| H  | -4.64428100 | -3.50898400 | -2.11627000 |
| H  | -6.07051800 | -1.48540300 | -2.32635400 |
| H  | -5.04822400 | 0.75494100  | -2.54556300 |
| C  | -1.74552900 | -3.42869800 | -2.01416800 |
| H  | -1.66709500 | -3.79476100 | -0.97637200 |
| H  | -0.08840400 | -2.92134600 | -3.38163800 |
| H  | -1.92675100 | -4.30671500 | -2.64712700 |
| H  | 3.91264500  | 0.59003800  | 2.66961100  |
| C  | 0.58926000  | 1.02966300  | 2.06028500  |
| N  | 1.05174200  | 0.93475000  | 3.13438600  |
| Cu | 0.32023000  | 1.07501200  | 0.15607800  |
| C  | -0.15766500 | 1.99665500  | -1.49997800 |
| N  | -0.59735100 | 2.43404100  | -2.49486800 |
| C  | -2.83841100 | -2.85499500 | 2.64937900  |
| C  | -3.16146600 | -2.32122400 | 1.40262300  |
| C  | -2.83135800 | -1.00879500 | 1.10226400  |
| C  | -2.17118300 | -0.21012800 | 2.05500300  |
| C  | -1.82423800 | -0.77526700 | 3.30057300  |
| C  | -2.16605000 | -2.08133200 | 3.59825300  |
| H  | -3.68273600 | -2.92313700 | 0.65954200  |
| H  | -1.25733500 | -0.17259400 | 4.00932800  |
| H  | -1.90306500 | -2.50678000 | 4.56430800  |
| C  | -1.91623000 | 1.18269600  | 1.84187800  |
| H  | -1.55299700 | 1.72185900  | 2.71912600  |
| H  | -3.10690400 | -3.88403200 | 2.88333800  |
| H  | -3.09086000 | -0.59317800 | 0.13067100  |

|   |             |            |             |
|---|-------------|------------|-------------|
| C | -4.19887700 | 4.38811300 | 0.07491000  |
| C | -4.79882400 | 2.99170800 | 0.16137300  |
| C | -4.07441100 | 2.11794700 | 1.18019200  |
| C | -2.56219100 | 2.03462800 | 0.81864700  |
| C | -1.98007500 | 3.44770500 | 0.77799100  |
| C | -2.70885600 | 4.31815000 | -0.23300300 |
| H | -4.72660200 | 4.98067800 | -0.68494500 |
| H | -5.86644800 | 3.03715100 | 0.41987900  |
| H | -4.18368100 | 2.54521700 | 2.19177800  |
| H | -2.06412600 | 3.88758700 | 1.78866400  |
| H | -2.54077300 | 3.89852500 | -1.23882400 |
| H | -4.73066200 | 2.50410400 | -0.82612500 |
| H | -4.51414900 | 1.11120600 | 1.20554800  |
| H | -2.49777700 | 1.57251800 | -0.17956800 |
| H | -0.91037400 | 3.39201800 | 0.53413400  |
| H | -2.26852400 | 5.32410600 | -0.24170100 |
| H | -4.35134700 | 4.90501400 | 1.03819700  |

*e-S-pro*

|   |             |             |             |
|---|-------------|-------------|-------------|
| C | 0.15224700  | 2.30665900  | 0.28601600  |
| N | 0.16859000  | 3.43163800  | -0.00124600 |
| C | 3.84932800  | -1.04370200 | -0.37474400 |
| C | 3.22890900  | -0.21032000 | -1.30082600 |
| C | 2.03443000  | 0.42290900  | -0.97993000 |
| C | 1.44748100  | 0.22976100  | 0.27106000  |
| C | 2.07599100  | -0.60274500 | 1.19483000  |
| C | 3.27075600  | -1.23858700 | 0.87455500  |
| H | 3.68030900  | -0.04787300 | -2.27794000 |
| H | 1.62127200  | -0.75620600 | 2.17454700  |
| H | 3.75224100  | -1.88526400 | 1.60598800  |
| C | 0.11877400  | 0.87704700  | 0.60585300  |
| H | -0.05113500 | 0.79052800  | 1.69348700  |
| H | 4.78638800  | -1.53723500 | -0.62602100 |



|   |             |             |             |
|---|-------------|-------------|-------------|
| H | 1.55791400  | 1.08858400  | -1.70096400 |
| C | -3.65384900 | -1.26153800 | -0.05782200 |
| C | -2.34924200 | -1.95330900 | -0.43213400 |
| C | -1.15157700 | -1.28364900 | 0.23236500  |
| C | -1.08410600 | 0.20493300  | -0.10127200 |
| C | -2.39786100 | 0.89280500  | 0.26801800  |
| C | -3.59242000 | 0.22173400  | -0.39934400 |
| H | -4.50375200 | -1.74050300 | -0.56352100 |
| H | -2.38107500 | -3.01803600 | -0.16249100 |
| H | -1.23198300 | -1.39344500 | 1.33027200  |
| H | -2.51935900 | 0.84488800  | 1.36588300  |
| H | -3.50747600 | 0.33915100  | -1.49295700 |
| H | -2.22011900 | -1.91351500 | -1.52707800 |
| H | -0.22028900 | -1.78600200 | -0.06384900 |
| H | -0.92761100 | 0.31099600  | -1.19132900 |
| H | -2.35940300 | 1.95907100  | 0.00368300  |
| H | -4.52151000 | 0.72856400  | -0.10446000 |
| H | -3.82771500 | -1.37715500 | 1.02572500  |

**TS-L2-R**

|   |             |             |             |
|---|-------------|-------------|-------------|
| C | 1.38384400  | 2.74216700  | -0.88530300 |
| O | 0.62207100  | 2.03163300  | -1.90098200 |
| C | 0.74920000  | 2.26851600  | 0.44865200  |
| H | 1.43518700  | 1.72378600  | 1.11094600  |
| C | -0.30610100 | 1.30867500  | -1.24567000 |
| N | -0.31124600 | 1.35416700  | 0.02374300  |
| C | -1.21310100 | 0.52606400  | -2.10956800 |
| C | -1.46716600 | 1.07769800  | -3.50632100 |
| C | -0.59817700 | -0.10440900 | -3.36241300 |
| H | -0.99992700 | 2.03571300  | -3.71496800 |
| H | -2.47134500 | 0.94091200  | -3.89568700 |
| H | 0.47677400  | 0.02063200  | -3.46912200 |
| H | -0.99412500 | -1.07764700 | -3.64442500 |

|    |             |             |             |
|----|-------------|-------------|-------------|
| C  | -4.23378800 | -1.40442100 | -1.57518700 |
| O  | -3.24564700 | -0.66858400 | -2.34038000 |
| C  | -3.76368000 | -1.23503400 | -0.11146900 |
| H  | -4.41426400 | -0.61282100 | 0.51642200  |
| C  | -2.31342200 | -0.23222200 | -1.47983100 |
| N  | -2.47779500 | -0.53487800 | -0.24633900 |
| C  | 1.11460600  | 4.23782800  | -0.97217900 |
| H  | 0.99150600  | 4.56823700  | -2.01063300 |
| H  | 1.98219300  | 4.77126600  | -0.55552000 |
| C  | -4.15299100 | -2.89587200 | -1.88242900 |
| H  | -3.85049900 | -3.07688500 | -2.92048300 |
| H  | -5.20148700 | -0.95186700 | -1.81014000 |
| H  | -5.15144400 | -3.33684100 | -1.74863800 |
| H  | 2.43256300  | 2.46048200  | -1.03283800 |
| C  | -0.57105700 | 0.34881000  | 3.02110200  |
| N  | 0.00614500  | 0.69083800  | 3.97886100  |
| Cu | -1.55227400 | 0.19601500  | 1.45152300  |
| C  | -3.07540400 | 1.40775300  | 1.77964700  |
| N  | -4.05410100 | 2.04734800  | 1.82155500  |
| C  | 3.70510500  | -0.56496300 | 0.07932300  |
| C  | 3.48802200  | -0.50540300 | 1.45889200  |
| C  | 2.24608400  | -0.79048300 | 2.00864500  |
| C  | 1.16991600  | -1.15132900 | 1.18711100  |
| C  | 1.39154900  | -1.22127800 | -0.19606200 |
| C  | 2.63336100  | -0.93355300 | -0.73995100 |
| H  | 4.31288200  | -0.21910900 | 2.11283600  |
| H  | 2.08936800  | -0.68401900 | 3.08080900  |
| H  | 0.56313300  | -1.50647500 | -0.84921700 |
| H  | 2.78266500  | -0.99056000 | -1.82022900 |
| C  | 5.05147700  | -0.27668700 | -0.51820500 |
| C  | -0.16104500 | -1.47840100 | 1.71417800  |
| H  | -0.80275000 | -1.85816500 | 0.91008600  |
| C  | 5.82505000  | -1.53477000 | -0.93974700 |

|   |             |             |             |
|---|-------------|-------------|-------------|
| H | 5.19319500  | -2.09189400 | -1.65418100 |
| C | -0.28246100 | -2.34577100 | 2.93796200  |
| H | 0.03257100  | -3.36729900 | 2.67001500  |
| H | 0.33430000  | -2.00055600 | 3.77202400  |
| H | -1.31941800 | -2.39196900 | 3.29214900  |
| H | 5.66897700  | 0.28617700  | 0.20158700  |
| H | 4.93234000  | 0.37223600  | -1.40161800 |
| C | 6.11146800  | -2.43585000 | 0.25244200  |
| H | 6.71258500  | -1.89889500 | 1.00293500  |
| H | 5.19028200  | -2.77437600 | 0.74342500  |
| H | 6.67941200  | -3.32492500 | -0.05123000 |
| C | 7.11735100  | -1.13932800 | -1.63882700 |
| H | 7.67721400  | -2.02207700 | -1.97421800 |
| H | 6.92925100  | -0.50454900 | -2.51528500 |
| H | 7.76834800  | -0.57619400 | -0.95313400 |
| C | -0.10564500 | 4.45561200  | -0.07592600 |
| H | -1.02639200 | 4.14856800  | -0.59446000 |
| H | -0.23760400 | 5.50204600  | 0.22082100  |
| C | 0.16795700  | 3.52501400  | 1.10325300  |
| H | -0.71654500 | 3.28763900  | 1.70575600  |
| H | 0.92110300  | 3.96787700  | 1.77110700  |
| C | -3.58256000 | -2.65788000 | 0.41624900  |
| H | -4.54283000 | -3.01959100 | 0.81204200  |
| H | -2.85754100 | -2.70595400 | 1.23873500  |
| C | -3.19759200 | -3.45636400 | -0.82680100 |
| H | -3.28924700 | -4.54035200 | -0.69635100 |
| H | -2.15171200 | -3.24840400 | -1.10674400 |

### TS-L2-S

|    |             |             |            |
|----|-------------|-------------|------------|
| C  | 0.25212800  | -0.83726400 | 2.77447400 |
| N  | -0.32044400 | -0.70440000 | 3.78531400 |
| Cu | 1.26027100  | -0.64966600 | 1.22233000 |
| C  | 2.97168100  | 0.20460200  | 1.82187300 |

|   |             |             |             |
|---|-------------|-------------|-------------|
| N | 3.99972900  | 0.76251700  | 1.87757100  |
| C | -3.99295100 | -0.41952300 | -0.29643100 |
| C | -3.88127100 | -0.98233900 | 0.98024600  |
| C | -2.68910500 | -1.53233800 | 1.42334800  |
| C | -1.56022100 | -1.54524200 | 0.59179100  |
| C | -1.66998300 | -0.97734500 | -0.68514900 |
| C | -2.86710800 | -0.43088300 | -1.12238500 |
| H | -4.74749100 | -0.96922400 | 1.64353500  |
| H | -2.61719100 | -1.92386300 | 2.43630000  |
| H | -0.79003200 | -0.95865100 | -1.32996300 |
| H | -2.93493600 | 0.00436400  | -2.12074100 |
| C | -5.29744000 | 0.16133100  | -0.75728700 |
| C | -0.29211100 | -2.15757500 | 0.99384800  |
| H | 0.33565500  | -2.34385000 | 0.11634200  |
| C | -6.34891000 | -0.89293000 | -1.13220100 |
| H | -6.50413000 | -1.53867000 | -0.24991300 |
| C | -0.27597900 | -3.35499200 | 1.90338100  |
| H | -0.83928100 | -3.20754600 | 2.82819000  |
| H | -0.71260000 | -4.20740100 | 1.35834700  |
| H | 0.75142300  | -3.62048400 | 2.17974400  |
| H | -5.12887900 | 0.81288300  | -1.63157000 |
| H | -5.71271600 | 0.80483500  | 0.03520900  |
| C | -5.87458800 | -1.76348800 | -2.28665900 |
| H | -5.67520900 | -1.14503100 | -3.17612100 |
| H | -4.95097100 | -2.30329100 | -2.04157800 |
| H | -6.63627500 | -2.50428400 | -2.56301600 |
| C | -7.66641800 | -0.21370400 | -1.47537800 |
| H | -8.44393300 | -0.94897900 | -1.72045900 |
| H | -8.03445800 | 0.40407900  | -0.64525500 |
| H | -7.54412200 | 0.44239800  | -2.35055800 |
| C | 0.12585800  | 3.65286600  | 0.90102400  |
| O | 1.10480400  | 3.38973400  | -0.13550300 |
| C | -0.24633700 | 2.24241300  | 1.42161400  |

|   |             |             |             |
|---|-------------|-------------|-------------|
| H | 0.10680100  | 2.02247000  | 2.43818300  |
| C | 1.19240300  | 2.05077300  | -0.24846000 |
| N | 0.45227500  | 1.33513000  | 0.50223200  |
| C | 2.21158100  | 1.58832000  | -1.21022100 |
| C | 2.58875300  | 2.52713200  | -2.34976500 |
| C | 3.51825600  | 2.39561100  | -1.21602300 |
| H | 1.98580000  | 3.42837300  | -2.41913200 |
| H | 2.84440000  | 2.05302500  | -3.29309700 |
| H | 3.57130700  | 3.18240000  | -0.46938000 |
| H | 4.42461900  | 1.80685300  | -1.33448500 |
| C | 3.46089600  | -1.58637100 | -2.40012600 |
| O | 3.20404600  | -0.16201000 | -2.45312700 |
| C | 2.57044300  | -2.07334600 | -1.23185200 |
| H | 1.76860100  | -2.75992500 | -1.54100500 |
| C | 2.40918700  | 0.14552300  | -1.41948800 |
| N | 1.97661500  | -0.83475400 | -0.71160300 |
| C | -1.15408900 | 4.24081100  | 0.31221800  |
| H | -0.94650800 | 4.83854400  | -0.58337300 |
| H | -1.60624400 | 4.91120300  | 1.05791200  |
| C | 4.90055200  | -1.85328700 | -1.97865000 |
| H | 5.57659000  | -1.08007000 | -2.36292500 |
| H | 3.20011500  | -1.98312400 | -3.38645100 |
| H | 5.21801100  | -2.81416900 | -2.41064900 |
| H | 0.61807600  | 4.30495500  | 1.62895400  |
| C | 3.53255400  | -2.70083800 | -0.21848500 |
| H | 3.65028900  | -3.77105900 | -0.44651700 |
| C | 4.84370100  | -1.95505800 | -0.45391800 |
| H | 5.71059600  | -2.47338300 | -0.03008300 |
| C | -2.06901000 | 3.03430700  | 0.08384200  |
| H | -1.79109500 | 2.50895300  | -0.84309500 |
| H | -3.12783400 | 3.30840100  | -0.00112000 |
| C | -1.76277300 | 2.15211400  | 1.29032800  |
| H | -2.10001600 | 1.11419700  | 1.19733800  |

|   |             |             |            |
|---|-------------|-------------|------------|
| H | -2.22740800 | 2.57332100  | 2.19445400 |
| H | 3.15821700  | -2.61290800 | 0.81082000 |
| H | 4.79676800  | -0.96194500 | 0.01897800 |

**TS-L3-R**

|    |             |             |             |
|----|-------------|-------------|-------------|
| C  | 0.79841200  | 1.38055500  | 2.68388200  |
| O  | 0.09813800  | 2.29163700  | 1.80822800  |
| C  | 0.12887300  | 0.02295900  | 2.42368400  |
| H  | 0.84090100  | -0.75369800 | 2.11564100  |
| C  | -0.75966900 | 1.53697700  | 1.08993900  |
| N  | -0.80699000 | 0.29227000  | 1.33664100  |
| C  | -1.55339900 | 2.28033500  | 0.09198600  |
| C  | -1.91919100 | 3.71550500  | 0.45228500  |
| C  | -0.88179800 | 3.48702000  | -0.56932700 |
| H  | -1.60653900 | 4.03590400  | 1.44202800  |
| H  | -2.90175200 | 4.04909300  | 0.13225400  |
| H  | 0.16010100  | 3.64643400  | -0.30250800 |
| H  | -1.13726600 | 3.65709300  | -1.61248500 |
| C  | -4.15344600 | 1.42522200  | -2.26581700 |
| O  | -3.37363900 | 2.30453900  | -1.42767700 |
| C  | -3.76609400 | 0.02713500  | -1.78267200 |
| H  | -4.53623800 | -0.45263500 | -1.16300500 |
| C  | -2.50773300 | 1.53332600  | -0.74982900 |
| N  | -2.59483400 | 0.26903000  | -0.93393400 |
| H  | -5.20767000 | 1.67490600  | -2.12077500 |
| H  | 1.85949300  | 1.40101000  | 2.40600300  |
| C  | -1.02810700 | -2.82978400 | 0.81767400  |
| N  | -0.54493700 | -3.71098600 | 1.41542000  |
| Cu | -1.90718100 | -1.30438200 | 0.22683200  |
| C  | -3.65320900 | -1.38256800 | 1.14370900  |
| N  | -4.76025900 | -1.29017300 | 1.51077300  |
| C  | 3.42262800  | -0.12727000 | 0.05182500  |
| C  | 3.16249000  | -1.47606600 | 0.31219600  |

|   |             |             |             |
|---|-------------|-------------|-------------|
| C | 1.96310300  | -2.06642700 | -0.06041300 |
| C | 0.97435700  | -1.31950200 | -0.71506500 |
| C | 1.23992400  | 0.03134400  | -0.98364000 |
| C | 2.43900200  | 0.61641400  | -0.60798400 |
| H | 3.91830100  | -2.07143500 | 0.82625900  |
| H | 1.76536500  | -3.10457100 | 0.20133500  |
| H | 0.48269400  | 0.62617400  | -1.49803000 |
| H | 2.62131700  | 1.67118300  | -0.82414000 |
| C | 4.72715300  | 0.51012600  | 0.43250600  |
| C | -0.30657700 | -1.89917400 | -1.13927400 |
| H | -0.86713900 | -1.18680700 | -1.75763200 |
| C | 5.68473800  | 0.71491600  | -0.75080700 |
| H | 5.15872100  | 1.32821700  | -1.50388800 |
| C | -0.33376300 | -3.26696900 | -1.76531000 |
| H | 0.14206200  | -3.19960800 | -2.75692700 |
| H | 0.19574700  | -4.02122100 | -1.17750700 |
| H | -1.36301300 | -3.61631100 | -1.90667200 |
| H | 5.23846300  | -0.10535800 | 1.19138300  |
| H | 4.53722400  | 1.49009000  | 0.90142000  |
| C | 6.06597900  | -0.61119900 | -1.39224800 |
| H | 6.56138600  | -1.26442000 | -0.65690000 |
| H | 5.19089300  | -1.14850200 | -1.77925400 |
| H | 6.76560400  | -0.46079400 | -2.22474000 |
| C | 6.92472700  | 1.46715400  | -0.29073400 |
| H | 7.61371700  | 1.65077100  | -1.12540800 |
| H | 6.67061000  | 2.43696400  | 0.15799700  |
| H | 7.47035600  | 0.88274900  | 0.46547100  |
| H | 0.68595800  | 1.74955100  | 3.70818600  |
| H | -0.42767100 | -0.36605400 | 3.28584200  |
| H | -3.87306000 | 1.62463400  | -3.30719600 |
| H | -3.50758300 | -0.65686200 | -2.60098700 |

**TS-L3-S**

|    |             |             |             |
|----|-------------|-------------|-------------|
| C  | 3.92808800  | 1.92430200  | -2.10072900 |
| O  | 3.05125500  | 2.62924100  | -1.19621000 |
| C  | 3.70592000  | 0.45295300  | -1.74862300 |
| H  | 3.51763300  | -0.17721700 | -2.62714400 |
| C  | 2.28614400  | 1.70651900  | -0.59125200 |
| N  | 2.52213700  | 0.48144800  | -0.88243700 |
| C  | 1.24859300  | 2.26087100  | 0.29931300  |
| C  | 1.43783800  | 3.69689700  | 0.77808700  |
| C  | 0.43689800  | 3.42568700  | -0.26910800 |
| H  | 2.37307700  | 4.17225400  | 0.49787000  |
| H  | 1.08693600  | 3.89577600  | 1.78687500  |
| H  | 0.67063600  | 3.70979000  | -1.29251900 |
| H  | -0.61629400 | 3.43442800  | -0.00044400 |
| C  | -1.00856900 | 0.84419000  | 2.73506000  |
| O  | -0.42791300 | 1.91368000  | 1.95627000  |
| C  | -0.04672300 | -0.33134300 | 2.52267400  |
| H  | 0.56170300  | -0.56521000 | 3.40607400  |
| C  | 0.56577100  | 1.34948600  | 1.23852000  |
| N  | 0.83599300  | 0.12656700  | 1.45204800  |
| H  | -1.08678000 | 1.18792000  | 3.77062800  |
| H  | 3.62750600  | 2.18345300  | -3.12306800 |
| C  | 1.24660400  | -2.85655300 | 0.63608700  |
| N  | 0.80598900  | -3.78318300 | 1.19693200  |
| Cu | 2.01899400  | -1.24991800 | 0.11890900  |
| C  | 3.80739500  | -1.29944100 | 0.95767200  |
| N  | 4.92350100  | -1.17508700 | 1.28587700  |
| C  | -3.27157100 | -0.12391400 | -0.03220700 |
| C  | -2.97673200 | -1.46304700 | 0.25035900  |
| C  | -1.77825000 | -2.03791600 | -0.14337200 |
| C  | -0.82023500 | -1.28392000 | -0.83763700 |
| C  | -1.11781900 | 0.05535800  | -1.12344900 |
| C  | -2.32106100 | 0.62411700  | -0.73069700 |
| H  | -3.70374900 | -2.06079800 | 0.80271000  |



|   |             |             |             |
|---|-------------|-------------|-------------|
| H | -1.55147200 | -3.06697500 | 0.13224300  |
| H | -0.38252200 | 0.65573000  | -1.66287100 |
| H | -2.53623800 | 1.66692700  | -0.97137300 |
| C | -4.58473400 | 0.46976500  | 0.38780400  |
| C | 0.45835200  | -1.85205900 | -1.28269000 |
| H | 1.01663600  | -1.13329800 | -1.89648300 |
| C | -5.77059400 | 0.03492300  | -0.48582400 |
| H | -5.81921500 | -1.06784700 | -0.45756800 |
| C | 0.47432000  | -3.20978800 | -1.93131100 |
| H | -0.05902400 | -3.97015000 | -1.35515200 |
| H | -0.00708700 | -3.11939800 | -2.91852200 |
| H | 1.49940400  | -3.56457200 | -2.08548500 |
| H | -4.52229000 | 1.57109200  | 0.36749000  |
| H | -4.79887400 | 0.18903600  | 1.43236700  |
| C | -5.58372700 | 0.47074800  | -1.93169700 |
| H | -5.49395100 | 1.56689400  | -1.99329400 |
| H | -4.68133800 | 0.03545200  | -2.37963700 |
| H | -6.44266200 | 0.17470200  | -2.54779000 |
| C | -7.06627600 | 0.59429600  | 0.08269300  |
| H | -7.93358800 | 0.27382100  | -0.50891100 |
| H | -7.22798200 | 0.27379400  | 1.12061200  |
| H | -7.04747400 | 1.69470000  | 0.07234300  |
| H | 4.94630500  | 2.27974600  | -1.92236000 |
| H | 4.53087400  | 0.00669200  | -1.17662000 |
| H | -2.01383400 | 0.65205600  | 2.33497600  |
| H | -0.55502600 | -1.25554600 | 2.22123900  |
